# Supplementary material for: Plasticity in the cell division processes of obligate intracellular bacteria
Source: Front Cell Infect Microbiol. 2023 Oct 9;13:1205488. doi: 10.3389/fcimb.2023.1205488 (PMC10591338; doi:10.3389/fcimb.2023.1205488)
Supplement: Supplementary file 2 [file Table_1.xlsx]

## Sheet: Table S1
Table S1 Bacterial Species in this Review
Phylum	Class	Order	Family	Genus	Species
Pseudomonadota	Alphaproteobacteria	Caulobacterales	Caulobacteraceae	Caulobacter	vibrioides
Pseudomonadota	Gammaproteobacteria	Enterobacterales	Enterobacteriaceae	Escherichia	coli
Phylum	Class	Order	Family	Genus	Species	Number of strains or isolates
Pseudomonadota	Gammaproteobacteria	Legionellales	Coxiellaceae	Coxiella	burnetii	23
Pseudomonadota	Gammaproteobacteria	Enterobacterales	Erwiniaceae	Buchnera	aphidicola	53
Pseudomonadota	Alphaproteobacteria	Rickettsiales	Rickettsiaceae	Rickettsia	africae	1
Pseudomonadota	Alphaproteobacteria	Rickettsiales	Rickettsiaceae	Rickettsia	akari	1
Pseudomonadota	Alphaproteobacteria	Rickettsiales	Rickettsiaceae	Rickettsia	amblyommatis	1
Pseudomonadota	Alphaproteobacteria	Rickettsiales	Rickettsiaceae	Rickettsia	asembonensis	1
Pseudomonadota	Alphaproteobacteria	Rickettsiales	Rickettsiaceae	Rickettsia	australis	1
Pseudomonadota	Alphaproteobacteria	Rickettsiales	Rickettsiaceae	Rickettsia	belli	3
Pseudomonadota	Alphaproteobacteria	Rickettsiales	Rickettsiaceae	Rickettsia	canadensis	2
Pseudomonadota	Alphaproteobacteria	Rickettsiales	Rickettsiaceae	Rickettsia	conorii	7
Pseudomonadota	Alphaproteobacteria	Rickettsiales	Rickettsiaceae	Rickettsia	felis	1
Pseudomonadota	Alphaproteobacteria	Rickettsiales	Rickettsiaceae	Rickettsia	heilongjiangensis	1
Pseudomonadota	Alphaproteobacteria	Rickettsiales	Rickettsiaceae	Rickettsia	helvetica	1
Pseudomonadota	Alphaproteobacteria	Rickettsiales	Rickettsiaceae	Rickettsia	japonica	13
Pseudomonadota	Alphaproteobacteria	Rickettsiales	Rickettsiaceae	Rickettsia	massiliae	2
Pseudomonadota	Alphaproteobacteria	Rickettsiales	Rickettsiaceae	Rickettsia	montanensis	1
Pseudomonadota	Alphaproteobacteria	Rickettsiales	Rickettsiaceae	Rickettsia	parkeri	2
Pseudomonadota	Alphaproteobacteria	Rickettsiales	Rickettsiaceae	Rickettsia	peacockii	1
Pseudomonadota	Alphaproteobacteria	Rickettsiales	Rickettsiaceae	Rickettsia	philipii	1
Pseudomonadota	Alphaproteobacteria	Rickettsiales	Rickettsiaceae	Rickettsia	prowazekii	11
Pseudomonadota	Alphaproteobacteria	Rickettsiales	Rickettsiaceae	Rickettsia	rhipicephali	2
Pseudomonadota	Alphaproteobacteria	Rickettsiales	Rickettsiaceae	Rickettsia	rickettsia	12
Pseudomonadota	Alphaproteobacteria	Rickettsiales	Rickettsiaceae	Rickettsia	slovaca	2
Pseudomonadota	Alphaproteobacteria	Rickettsiales	Rickettsiaceae	Rickettsia	sp.	1
Pseudomonadota	Alphaproteobacteria	Rickettsiales	Rickettsiaceae	Rickettsia	typhi	4
Pseudomonadota	Alphaproteobacteria	Rickettsiales	Rickettsiaceae	Orientia	tsutsugamushi	8
Pseudomonadota	Alphaproteobacteria	Rickettsiales	Anaplasmataceae	Wolbachia	pipientis	25
Pseudomonadota	Alphaproteobacteria	Rickettsiales	Anaplasmataceae	Anaplasma	marginale	4
Pseudomonadota	Alphaproteobacteria	Rickettsiales	Anaplasmataceae	Anaplasma	phagocytophilum	5
Pseudomonadota	Alphaproteobacteria	Rickettsiales	Anaplasmataceae	Ehrlichia	canis	2
Pseudomonadota	Alphaproteobacteria	Rickettsiales	Anaplasmataceae	Ehrlichia	chaffeensis	8
Pseudomonadota	Alphaproteobacteria	Rickettsiales	Anaplasmataceae	Ehrlichia	muris	1
Pseudomonadota	Alphaproteobacteria	Rickettsiales	Anaplasmataceae	Ehrlichia	ruminantium	3
Pseudomonadota	Alphaproteobacteria	Rickettsiales	Anaplasmataceae	Ehrlichia	sp.	1
Chlamydiota	Chlamydiia	Chlamydiales	Chlamydiaceae	Chlamydia	abortus	7
Chlamydiota	Chlamydiia	Chlamydiales	Chlamydiaceae	Chlamydia	avium	1
Chlamydiota	Chlamydiia	Chlamydiales	Chlamydiaceae	Chlamydia	caviae	1
Chlamydiota	Chlamydiia	Chlamydiales	Chlamydiaceae	Chlamydia	crocodili	1
Chlamydiota	Chlamydiia	Chlamydiales	Chlamydiaceae	Chlamydia	felis	1
Chlamydiota	Chlamydiia	Chlamydiales	Chlamydiaceae	Chlamydia	gallinacea	1
Chlamydiota	Chlamydiia	Chlamydiales	Chlamydiaceae	Chlamydia	muridarum	21
Chlamydiota	Chlamydiia	Chlamydiales	Chlamydiaceae	Chlamydia	pecorum	5
Chlamydiota	Chlamydiia	Chlamydiales	Chlamydiaceae	Chlamydia	pneumoniae	12
Chlamydiota	Chlamydiia	Chlamydiales	Chlamydiaceae	Chlamydia	psittaci	23
Chlamydiota	Chlamydiia	Chlamydiales	Chlamydiaceae	Chlamydia	sp.	5
Chlamydiota	Chlamydiia	Chlamydiales	Chlamydiaceae	Chlamydia	suis	9
Chlamydiota	Chlamydiia	Chlamydiales	Chlamydiaceae	Chlamydia	trachomatis	107

## Sheet: Table S2
Table S2 Genomes Analyzed in this Review
Genome Name	IMG Genome ID	Genome Size	Gene Count
Coxiella burnetii 14160-001	2846931383	2004775	2128
Coxiella burnetii 14160-002	2851487262	1993104	2128
Coxiella burnetii 18430	2840586855	2005688	2146
Coxiella burnetii 2014-PE-15890	2848851271	2093382	2333
Coxiella burnetii 2574	2846909220	2007582	2126
Coxiella burnetii 3262	2684623103	2130797	2302
Coxiella burnetii 3345937	2687453490	2013572	2265
Coxiella burnetii 42785537	2843686443	2046808	2334
Coxiella burnetii 701CbB1	2846929251	2007705	2131
Coxiella burnetii CbCVIC1	2846911347	2037066	2242
Coxiella burnetii CbuG_Q212	643348531	2008870	1916
Coxiella burnetii CbuK_Q154	643348532	2102380	1991
Coxiella burnetii Dugway 5J108-111	640753021	2212937	2257
Coxiella burnetii Heizberg	2851480580	1999884	2130
Coxiella burnetii Henzerling	2848847091	2000126	2117
Coxiella burnetii MSU Goat Q177	2846913590	2102302	2265
Coxiella burnetii Namibia	2627853754	2101438	2047
Coxiella burnetii Nine Mile phase I / RSA 493	637000086	2032674	2175
Coxiella burnetii nine mile phase II	2851485070	2024349	2191
Coxiella burnetii RSA 331	641228487	2053744	2263
Coxiella burnetii RSA 439	2840592707	2006564	2140
Coxiella burnetii Schperling	2848849209	2048598	2061
Coxiella burnetii Scurry_Q217	2846927155	1973771	2095
Buchnera aphidicola (Aphis fabae) Afa-UT1	2884498010	634831	630
Buchnera aphidicola (Aphis glycines) BAg	2654587723	628164	622
Buchnera aphidicola (Aphis gossypii) Ago-UT1	2884499064	628224	628
Buchnera aphidicola (Cinara pseudotaxifoliae) BCipseudotaxifoliae/3056	2846861890	455403	426
Buchnera aphidicola (Diuraphis noxia)	2718218137	636266	627
Buchnera aphidicola 5A	643348520	642122	590
Buchnera aphidicola Aar	3002284729	641024	629
Buchnera aphidicola Acr	3002286658	641853	634
Buchnera aphidicola Ahe	3002285363	645010	645
Buchnera aphidicola Ak	2511231206	653223	606
Buchnera aphidicola Ala	3002287952	653487	632
Buchnera aphidicola Ana	3002305320	641028	638
Buchnera aphidicola Ane	3002261993	642180	645
Buchnera aphidicola APS	637000043	655725	615
Buchnera aphidicola Bbr	3002301387	656629	650
Buchnera aphidicola Bca	3002303751	654826	647
Buchnera aphidicola Bciconfinis 2801	2843639423	451961	429
Buchnera aphidicola Bcifornacula 2912	2841132449	456703	423
Buchnera aphidicola BTI	2834886455	642929	642
Buchnera aphidicola BTs Pazieg	2841132873	430464	422
Buchnera aphidicola BuCicuneomaculata/2628	2884500114	442546	420
Buchnera aphidicola BuCicurtihirsuta/3053	2884492481	442248	423
Buchnera aphidicola BuCicurvipes/3402	2884498641	445448	422
Buchnera aphidicola BuCikochiana/2762	2884499693	442301	420
Buchnera aphidicola BuCilaricifoliae/3058	2884500535	445591	424
Buchnera aphidicola BuCipiceae/3303	2884492905	443798	420
Buchnera aphidicola BuCisplendens/3004	2887836388	453957	422
Buchnera aphidicola BuCisplendens/pseudotsugae/3390	2884497005	453422	423
Buchnera aphidicola BuCistrobi/3249	2843639003	449035	419
Buchnera aphidicola Cc	643348521	422434	400
Buchnera aphidicola Ct	650716012	444925	393
Buchnera aphidicola F009	2558860197	651310	608
Buchnera aphidicola G002	2558860195	651316	607
Buchnera aphidicola Hla	3002300736	652809	646
Buchnera aphidicola Hta	3002302676	644774	636
Buchnera aphidicola JF99	650377916	641716	625
Buchnera aphidicola LL01	650377917	641799	612
Buchnera aphidicola LNK	2834887098	653353	657
Buchnera aphidicola Lps	3002284067	652461	657
Buchnera aphidicola LSR1	2872745489	642011	623
Buchnera aphidicola LSU	2846861257	637486	632
Buchnera aphidicola Meu	3002306571	645334	622
Buchnera aphidicola Mga	3002286013	654448	640
Buchnera aphidicola Msa	3002305963	632796	603
Buchnera aphidicola Mst	3002289087	630615	625
Buchnera aphidicola Rpa	3002287297	653824	650
Buchnera aphidicola Sav	3002302042	647564	629
Buchnera aphidicola Sg	637000045	641454	588
Buchnera aphidicola TLW03	650377918	641770	608
Buchnera aphidicola Tuc7	643348522	641895	588
Buchnera aphidicola Ua	2511231158	627953	575
Buchnera aphidicola USDA	2558860194	651306	610
Buchnera aphidicola W106	2558860196	651304	608
Rickettsia africae ESF-5	644736402	1290917	1077
Rickettsia akari Hartford	640753043	1231060	1295
Rickettsia amblyommatis GAT-30V	2512564072	1480884	1426
Rickettsia asembonensis NMRCii	2802429295	1393719	1551
Rickettsia australis Cutlack	2512564059	1323280	1297
Rickettsia bellii An04	2811995359	1579798	1590
Rickettsia bellii OSU 85-389	640753044	1528980	1513
Rickettsia bellii RML369-C	637000242	1522076	1470
Rickettsia canadensis CA410	2512564031	1150228	1052
Rickettsia canadensis McKiel	640753045	1159772	1129
Rickettsia conorii heilongjiangensis 054	650716082	1278471	1333
Rickettsia conorii heilongjiangensis CH8-1	2888049983	1279380	1545
Rickettsia conorii heilongjiangensis HCN-13	2888046903	1279369	1539
Rickettsia conorii heilongjiangensis Sendai-58	2888048443	1279369	1539
Rickettsia conorii Malish 7	637000243	1268755	1416
Rickettsia conorii raoultii IM16	2772190785	1344557	1564
Rickettsia conorii raoultii Khabarovsk	2718218392	1483284	1704
Rickettsia endosymbiont of Bemisia tabaci MEAM1	2802429316	1378618	1522
Rickettsia felis URRWXCal2	637000244	1587240	1552
Rickettsia heilongjiangensis Sendai-29	2888045363	1279369	1539
Rickettsia helvetica C9P9	2597489904	1417015	1660
Rickettsia japonica DT-1	2806310711	1284030	1477
Rickettsia japonica HH06154	2806310725	1284028	1478
Rickettsia japonica HH07124	2806310701	1284009	1476
Rickettsia japonica HH07167	2806310731	1284030	1476
Rickettsia japonica HH-1	2806310733	1283942	1474
Rickettsia japonica LA4/2015	2841527801	1283254	1528
Rickettsia japonica MZ08014	2806310707	1284037	1475
Rickettsia japonica Nakase	2806310709	1284030	1476
Rickettsia japonica OHH-1	2806310732	1283227	1473
Rickettsia japonica PO-1	2806310710	1283942	1474
Rickettsia japonica Tsuneishi	2806310736	1284030	1476
Rickettsia japonica YH	2511231062	1283087	1009
Rickettsia japonica YH_M	2806310729	1284030	1476
Rickettsia massiliae AZT80	2512564029	1278719	1243
Rickettsia massiliae MTU5	641228503	1376184	1435
Rickettsia montanensis OSU 85-930	2512564067	1279798	1253
Rickettsia parkeri Atlantic Rainforest	2843898319	1348030	1598
Rickettsia parkeri Portsmouth	2512564062	1300386	1354
Rickettsia peacockii Rustic	644736403	1314898	984
Rickettsia philipii 364D	2512564043	1287740	1380
Rickettsia prowazekii Breinl	2541047049	1109301	956
Rickettsia prowazekii BuV67-CWPP	2512564080	1111445	879
Rickettsia prowazekii Chernikova	2512564053	1109804	881
Rickettsia prowazekii Dachau	2512564070	1109051	875
Rickettsia prowazekii GvV257	2512564076	1111969	865
Rickettsia prowazekii Katsinyian	2512564054	1111454	880
Rickettsia prowazekii Madrid E	637000245	1111523	875
Rickettsia prowazekii Naples-1	2684623071	1111769	919
Rickettsia prowazekii NMRC Madrid E	2554235386	1111520	974
Rickettsia prowazekii Rp22	646862338	1111612	990
Rickettsia prowazekii RpGvF24	2512564077	1112101	870
Rickettsia rhipicephali 3-7-female6-CWPP	2512564064	1305467	1302
Rickettsia rhipicephali HJ#5	2671180980	1448632	1672
Rickettsia rickettsii Arizona	2512564030	1267197	1380
Rickettsia rickettsii Brazil	2512564034	1255681	1369
Rickettsia rickettsii Colombia	2512564049	1270083	1387
Rickettsia rickettsii Hauke	2512564040	1269774	1377
Rickettsia rickettsii Hino	2512564048	1286792	1388
Rickettsia rickettsii Hlp#2	2512564047	1270751	1345
Rickettsia rickettsii Iowa	641522647	1268175	1421
Rickettsia rickettsii Iowa Large Clone	2718218151	1268220	1471
Rickettsia rickettsii Iowa Small Clone	2718217968	1268242	1470
Rickettsia rickettsii Morgan	2627854257	1269809	1472
Rickettsia rickettsii R	2627853817	1257005	1453
Rickettsia rickettsii Sheila Smith	640753046	1257710	1382
Rickettsia slovaca 13-B	2511231061	1275089	1150
Rickettsia slovaca D-CWPP	2512564061	1275720	1383
Rickettsia typhi B9991CWPP	2512564075	1112957	875
Rickettsia typhi TH1527	2512564057	1112372	874
Rickettsia typhi TM2540	2848607864	1111939	918
Rickettsia typhi Wilmington	637000246	1111496	920
Orientia tsutsugamushi Boryong	640427127	2127051	2180
Orientia tsutsugamushi Gilliam	2843628538	2465012	2963
Orientia tsutsugamushi Karp	2841071530	2469803	2772
Orientia tsutsugamushi Kato	2834932383	2319449	2608
Orientia tsutsugamushi sv. Gilliam Ikeda	642555145	2008987	2004
Orientia tsutsugamushi TA686	2841074303	2254553	2758
Orientia tsutsugamushi UT176	2848330449	1932116	2254
Orientia tsutsugamushi UT76	2848270589	2078193	2454
Wolbachia endosymbiont Cameroon of Onchocerca volvulus	2597490173	960618	803
Wolbachia endosymbiont of Brugia pahangi FR3	2884832139	1072967	1268
Wolbachia endosymbiont of Carposina sasakii wCauA	2884841417	1449344	1586
Wolbachia endosymbiont of Chrysomya megacephala wMeg	2884845909	1376868	1388
Wolbachia endosymbiont of Cimex lectularius wCle	2791355066	1250060	1424
Wolbachia endosymbiont of Cruorifilaria tuberocauda 55YT	3002827153	863988	765
Wolbachia endosymbiont of Ctenocephalides felis wCfeJ	2884844624	1201647	1284
Wolbachia endosymbiont of Ctenocephalides felis wCfeT	2884843004	1495538	1619
Wolbachia endosymbiont of Culex quinquefasciatus Pel	642555168	1482455	1312
Wolbachia endosymbiont of Dipetalonema caudispina 362YU	3002825045	863427	713
Wolbachia endosymbiont of Dirofilaria (Dirofilaria) immitis FR3	2911807868	920122	825
Wolbachia endosymbiont of Drosophila incompta wInc_Cu	2721755752	1267840	1394
Wolbachia endosymbiont of Drosophila mauritiana wMau	2884857712	1273527	1315
Wolbachia endosymbiont of Drosophila melanogaster	637000339	1267782	1312
Wolbachia endosymbiont of Drosophila simulans wAu	2775506952	1268461	1339
Wolbachia endosymbiont of Drosophila simulans wHa	2540341171	1295804	1046
Wolbachia endosymbiont of Drosophila simulans wNo	2540341172	1301823	1077
Wolbachia endosymbiont of Folsomia candida Berlin	2848489269	1801626	1711
Wolbachia endosymbiont of Litomosoides sigmodontis wLsig	3002820018	1045802	1002
Wolbachia endosymbiont TRS of Brugia malayi	637000340	1080084	940
Wolbachia endosymbiont wPip_Mol of Culex molestus	2588253760	1340443	1227
Wolbachia pipientis wAlbB	2840666718	1484007	1561
Wolbachia pipientis wAu	2619619280	1268461	1323
Wolbachia sp. wOo	2524023201	957990	685
Wolbachia sp. wRi	643692055	1445873	1187
Anaplasma marginale Florida	643692003	1202435	980
Anaplasma marginale Jaboticabal	2840730522	1195321	1073
Anaplasma marginale Palmeira	2843749588	1195200	1076
Anaplasma marginale St. Maries	637000008	1197687	1006
Anaplasma phagocytophilum Dog2	2554235353	1473302	1298
Anaplasma phagocytophilum HZ	637000009	1471282	1335
Anaplasma phagocytophilum HZ2	2554235354	1477581	1287
Anaplasma phagocytophilum JM	2554235404	1481598	1296
Anaplasma phagocytophilum Norway variant2	2848558084	1545197	1385
Ehrlichia canis Jake	637000097	1315030	983
Ehrlichia canis YZ-1	2802429325	1314789	1032
Ehrlichia chaffeensis Arkansas	637000098	1176248	1158
Ehrlichia chaffeensis Heartland	2576861428	1172721	1010
Ehrlichia chaffeensis Jax	2576861426	1176890	1029
Ehrlichia chaffeensis Liberty	2576861429	1176202	1029
Ehrlichia chaffeensis Osceola	2576861431	1175197	1028
Ehrlichia chaffeensis Saint Vincent	2576861007	1173884	1013
Ehrlichia chaffeensis Wakulla	2576861427	1174357	1020
Ehrlichia chaffeensis West Paces	2576861430	1170935	1002
Ehrlichia muris AS145	2558309078	1196717	945
Ehrlichia ruminantium Gardel	637000099	1499920	992
Ehrlichia ruminantium Omatjenne	8002298062	1451240	1078
Ehrlichia ruminantium Welgevonden, ARC-OVI	639279308	1516355	931
Ehrlichia sp. HF	2576861437	1148904	985
Chlamydia abortus 1B_cevac	2808606940	1144467	1050
Chlamydia abortus 1H	2811995321	1144467	1050
Chlamydia abortus AB7	2639763020	1144467	1048
Chlamydia abortus GIMC 2006:CabB577	2814123253	1144224	1053
Chlamydia abortus GN6	2814123219	1144357	1056
Chlamydia abortus LLG	2814123411	1143694	1040
Chlamydia abortus S26/3	637000065	1144377	999
Chlamydia avium PV4360_2	2888566629	1048279	960
Chlamydia caviae GPIC	637000066	1181356	1050
Chlamydia crocodili No. 12	8004071746	1228996	1088
Chlamydia felis Fe/C-56	637000067	1173791	1057
Chlamydia gallinacea JX-1	2773857800	1067014	975
Chlamydia muridarum MoPn / Nigg	637000062	1080451	957
Chlamydia muridarum MopnTet14	648276628	1088736	989
Chlamydia muridarum Nigg 2 MCR	2585427637	1072952	932
Chlamydia muridarum Nigg CM001	2869642165	1072960	947
Chlamydia muridarum Nigg CM002	2850737149	1072951	939
Chlamydia muridarum Nigg CM003	2850734311	1072945	937
Chlamydia muridarum Nigg CM004	2859454378	1072947	942
Chlamydia muridarum Nigg CM005	2859448600	1072947	938
Chlamydia muridarum Nigg CM006	2859447658	1072952	941
Chlamydia muridarum Nigg CM007	2847966058	1072986	964
Chlamydia muridarum Nigg CM008	2847961209	1072952	938
Chlamydia muridarum Nigg CM009	2847969031	1072948	940
Chlamydia muridarum Nigg CM010	2850732425	1072952	937
Chlamydia muridarum Nigg CM012	2859451537	1072948	939
Chlamydia muridarum Nigg CM021	2871955486	1072968	950
Chlamydia muridarum Nigg2 CM972	2718218015	1072952	938
Chlamydia muridarum Nigg3	2808606535	1072951	936
Chlamydia muridarum Nigg3 CMUT3	2718218078	1072951	938
Chlamydia muridarum Nigg3 G0.1.1	2718217730	1072952	938
Chlamydia muridarum Nigg3 G28.38.1	2718217727	1072952	938
Chlamydia muridarum Nigg3-28	2850730537	1072952	938
Chlamydia pecorum E58	650716022	1106197	1029
Chlamydia pecorum NSW/Bov/SBE	8004074945	1106147	1001
Chlamydia pecorum P787	2554235368	1106409	966
Chlamydia pecorum PV3056/3	2554235369	1104552	962
Chlamydia pecorum W73	2554235370	1106534	966
Chlamydia pneumoniae AR39	637000068	1229853	1156
Chlamydia pneumoniae CM1	2684623179	1229887	1100
Chlamydia pneumoniae CV14	2687453230	1228123	1096
Chlamydia pneumoniae CWL011	2687453607	1228579	1099
Chlamydia pneumoniae CWL029	637000069	1230230	1096
Chlamydia pneumoniae J138	637000070	1226565	1113
Chlamydia pneumoniae K7	2687453608	1228523	1101
Chlamydia pneumoniae LPCoLN	646862319	1248550	1146
Chlamydia pneumoniae PB2	2684623178	1228126	1099
Chlamydia pneumoniae TW-183	637000071	1225935	1157
Chlamydia pneumoniae Wien1	2687453309	1228125	1096
Chlamydia pneumoniae Wien3	2687453457	1228576	1097
Chlamydia psittaci 01DC11	651053012	1172197	1016
Chlamydia psittaci 01DC12	2561511191	1178564	1001
Chlamydia psittaci 02DC15	651053013	1172182	1019
Chlamydia psittaci 08DC60	651053014	1172032	1014
Chlamydia psittaci 6BC	650716023	1179213	1016
Chlamydia psittaci 6BC	651053015	1179220	1050
Chlamydia psittaci 84/55	2519899546	1179551	1168
Chlamydia psittaci 8882_placenta	8004073895	1174195	1045
Chlamydia psittaci 9945_foetus	8004072839	1173638	1051
Chlamydia psittaci C19/98	651053016	1169374	1019
Chlamydia psittaci CP3	2522572169	1175702	1165
Chlamydia psittaci Ful127	2859450488	1178947	1048
Chlamydia psittaci GIMC 2003:Cps25SM	2874748837	1174410	1048
Chlamydia psittaci GIMC 2004:CpsAP23	2859456280	1179913	1050
Chlamydia psittaci GIMC 2005:CpsCP1	2869641112	1179934	1052
Chlamydia psittaci GR9	2519899534	1147152	1083
Chlamydia psittaci Horse_pl	2847967979	1177205	1051
Chlamydia psittaci M56	2518645539	1168938	1090
Chlamydia psittaci Mat116	2540341121	1163362	1058
Chlamydia psittaci MN	2518645540	1175981	1082
Chlamydia psittaci NJ1	2519899532	1168986	1093
Chlamydia psittaci WC	2519899545	1179818	1095
Chlamydia psittaci WS/RT/E30	2519899544	1148342	1093
Chlamydia sp. 08-1274/3	2806310688	1067202	965
Chlamydia sp. 10DC88	2576861440	1048269	994
Chlamydia sp. 2742-308	2721755525	1120737	1004
Chlamydia sp. H15-1957-10C	2869636221	1206142	1059
Chlamydia sp. S15-834K	2847963099	1162663	1054
Chlamydia suis 2-26b	2847964154	1083861	954
Chlamydia suis 3-25b	2871948815	1075010	955
Chlamydia suis 4-29b	2850729561	1094002	975
Chlamydia suis 5-22b	2874749886	1094277	973
Chlamydia suis 5-27b	2869640138	1101914	973
Chlamydia suis 9-1b	2869639178	1082175	959
Chlamydia suis SWA-14	2773857895	1094186	957
Chlamydia suis SWA-2	2773857910	1083283	954
Chlamydia suis SWA-86	2773857828	1092913	957
Chlamydia trachomatis 434Bu Hefty_Parental	2871951681	1038827	947
Chlamydia trachomatis A/363	2585427613	1051528	951
Chlamydia trachomatis A/7249	2522572200	1051879	949
Chlamydia trachomatis A2497	2511231082	1051827	924
Chlamydia trachomatis C/TW-3	2558309077	1051055	972
Chlamydia trachomatis chxRP1H1	2874747888	1042376	948
Chlamydia trachomatis chxRP4D10	2871950735	1042369	945
Chlamydia trachomatis chxRP4F1	2849094091	1042393	946
Chlamydia trachomatis D/13-96	2667527513	1042752	940
Chlamydia trachomatis D/14-96	2667527465	1041595	939
Chlamydia trachomatis D/CS637/11	2850735249	1050173	950
Chlamydia trachomatis D/SotonD1	2563366560	1050078	945
Chlamydia trachomatis D/SotonD5	2561511163	1049632	942
Chlamydia trachomatis D-EC	646862311	1050015	921
Chlamydia trachomatis D-LC	646862312	1050013	921
Chlamydia trachomatis Ds2923	645058724	1042757	975
Chlamydia trachomatis E/12-94	2660238138	1043010	945
Chlamydia trachomatis E/150	646862314	1042996	970
Chlamydia trachomatis E/Bour	2522572198	1050091	947
Chlamydia trachomatis E/C599	2554235349	1042626	912
Chlamydia trachomatis E/CS1025/11	2687453562	1050536	949
Chlamydia trachomatis E/SotonE4	2563366562	1050127	944
Chlamydia trachomatis E/SotonE8	2563366561	1056314	948
Chlamydia trachomatis E-103	2721755839	1050521	953
Chlamydia trachomatis E-32931	2721755464	1056419	958
Chlamydia trachomatis E-8873	2728369407	1050210	953
Chlamydia trachomatis E-DK-20	2718217779	1055535	958
Chlamydia trachomatis F/2-93	2667527480	1042619	939
Chlamydia trachomatis F/CS847/08	2684623114	1050553	949
Chlamydia trachomatis F/SotonF3	2563366564	1050282	943
Chlamydia trachomatis F/SW4	2561511164	1050229	928
Chlamydia trachomatis F/SWFPminus	2619619080	1042731	940
Chlamydia trachomatis F-6068	2721755836	1050231	953
Chlamydia trachomatis G/11074	646862315	1042875	962
Chlamydia trachomatis G/9301	646862317	1042811	964
Chlamydia trachomatis G/SotonG1	2563366563	1049642	943
Chlamydia trachomatis Ia/20-97	2660238314	1043181	941
Chlamydia trachomatis Ia/CS190/96	2687453616	1049505	945
Chlamydia trachomatis Ia/SotonIa1	2563366607	1050130	945
Chlamydia trachomatis Ia/SotonIa3	2563366606	1050283	945
Chlamydia trachomatis IU824	2597489930	1050524	953
Chlamydia trachomatis J/27-97	2667527515	1042783	949
Chlamydia trachomatis J/31-98	2663763454	1043207	941
Chlamydia trachomatis J6276tet1	2554235335	1080953	1002
Chlamydia trachomatis K/SotonK1	2563366608	1049940	943
Chlamydia trachomatis L1/115	2563366609	1046584	940
Chlamydia trachomatis L1/1322/p2	2522572199	1046928	941
Chlamydia trachomatis L1/224	2563366611	1046319	941
Chlamydia trachomatis L2/25667R	2540341141	1038839	933
Chlamydia trachomatis L2/434/Bu(f)	2563366582	1046341	953
Chlamydia trachomatis L2b/795	2563366615	1046220	941
Chlamydia trachomatis L2b/8200/07	2563366610	1046364	941
Chlamydia trachomatis L2b/Ams1	2563366565	1046379	941
Chlamydia trachomatis L2b/Ams3	2563366566	1046218	941
Chlamydia trachomatis L2b/Canada1	2563366601	1046041	946
Chlamydia trachomatis L2b/CS19/08	2630968628	1046364	944
Chlamydia trachomatis L2b/CS784/08	2630968829	1046364	944
Chlamydia trachomatis L2b/CV204	2563366613	1046381	941
Chlamydia trachomatis L2b/LST	2563366614	1046376	941
Chlamydia trachomatis L2b/UCH-2	2563366612	1046337	941
Chlamydia trachomatis L2c	650716021	1038313	997
Chlamydia trachomatis L2tet1	2872746113	1076624	980
Chlamydia trachomatis L3/404/LN	2563366568	1046672	938
Chlamydia trachomatis QH111L	2718217778	1033342	943
Chlamydia trachomatis RC-F69	2554235326	1046087	967
Chlamydia trachomatis RC-Fs342	2554235332	1083842	997
Chlamydia trachomatis RC-J/971	2554235340	1038442	968
Chlamydia trachomatis RC-J953	2554235330	1038792	963
Chlamydia trachomatis RC-J966	2554235334	1038839	969
Chlamydia trachomatis RC-JL2s3	2554235331	1046171	962
Chlamydia trachomatis RC-Js122	2554235333	1061854	978
Chlamydia trachomatis RC-L2/55	2554235339	1038870	970
Chlamydia trachomatis RC-L2s46	2554235327	1038817	968
Chlamydia trachomatis SB006930	2718218217	1051923	963
Chlamydia trachomatis SB013321	2718217804	1051874	964
Chlamydia trachomatis sv. A HAR-13	637000063	1051969	965
Chlamydia trachomatis sv. B B/TZ1A828/OT	644736343	1151263	1045
Chlamydia trachomatis sv. B Jali20/OT	644736342	1044352	918
Chlamydia trachomatis sv. D D/UW-3/CX	637000064	1042519	941
Chlamydia trachomatis sv. D- SQ29	2869643113	1047716	952
Chlamydia trachomatis sv. D- SQ32	2869644066	1047716	952
Chlamydia trachomatis sv. E Sweden2	650377921	1042839	903
Chlamydia trachomatis sv. F 70	645058818	1048006	966
Chlamydia trachomatis sv. F 70s	645058819	1046064	962
Chlamydia trachomatis sv. G G/11222	646862316	1042354	970
Chlamydia trachomatis sv. H SQ20	2871953582	1048529	948
Chlamydia trachomatis sv. H SQ24	2847965109	1048538	948
Chlamydia trachomatis sv. Ia SQ06	2859453427	1042998	950
Chlamydia trachomatis sv. Ia SQ07	2859452477	1043042	949
Chlamydia trachomatis sv. Ia SQ09	2871954531	1042567	954
Chlamydia trachomatis sv. Ia SQ10	2847967023	1042575	955
Chlamydia trachomatis sv. Ia SQ12	2859455321	1042577	958
Chlamydia trachomatis sv. Ia SQ14	2844349206	1042578	956
Chlamydia trachomatis sv. J 6276	645058820	1043181	963
Chlamydia trachomatis sv. J 6276s	645058821	1043182	965
Chlamydia trachomatis sv. J SQ01	2871956437	1048696	948
Chlamydia trachomatis sv. J SQ02	2850736200	1048696	948
Chlamydia trachomatis sv. J SQ05	2850731476	1048696	948
Chlamydia trachomatis sv. Ja SQ25	2850733363	1043246	947
Chlamydia trachomatis sv. Ja SQ28	2859449539	1043173	948
Chlamydia trachomatis sv. K SQ15	2847962148	1048307	950
Chlamydia trachomatis sv. K SQ19	2869638229	1048306	948
Chlamydia trachomatis sv. L2 434/BU	644736341	1046341	926
Chlamydia trachomatis sv. L2 L2b/UCH-1/proctitis	644736344	1046369	925
Chlamydia trachomatis sv. L2 tet9	2871949771	1054567	963
Chlamydia trachomatis sv. LGV2 434Bu 383/384 IGR::Tn	2869637281	1040250	947
Chlamydia trachomatis sv. LGV2 434Bu cdu1::Tn	2851292450	1040250	949

## Sheet: Table S3
Table S2 Genes Used in Blast Analysis
Eschericha coli K-12 MG1655				Caulobacter vibrioides NA1000
Gene Symbol	Product	Gene ID	Locus Tag	Gene Symbol	Product	Gene ID	Locus Tag
alr	alanine racemase (EC 5.1.1.1)	646316037	b4053	alr	alanine racemase (EC 5.1.1.1)	643619976	CCNA_01733
amiA	N-acetylmuramoyl-l-alanine amidase I	646314398	b2435	amiC	N-acetylmuramoyl-L-alanine amidase	643620196	CCNA_01952
amiB	N-acetylmuramoyl-l-alanine amidase II	646316160	b4169	dacC	D-alanyl-D-alanine serine-type carboxypeptidase	643620491	CCNA_02243
amiC	N-acetylmuramoyl-L-alanine amidase	646314782	b2817	ddl	D-alanine--D-alanine ligase	643620883	CCNA_02626
amiD	N-acetylmuramoyl-L-alanine amidase	646312782	b0867	dipI	SH3-like domain	643622112	CCNA_03837
dacA	D-alanyl-D-alanine carboxypeptidase (penicillin-binding protein 5)	646312545	b0632	ftsA	cell division protein FtsA	643620881	CCNA_02624
dacC	penicillin-binding protein 6. Serine peptidase. MEROPS family S11	646312753	b0839	ftsB	septum formation initiator	643620040	CCNA_01797
ddlA	D-alanine--D-alanine ligase (EC 6.3.2.4)	646312286	b0381	ftsE	cell division ATP-binding protein ftsE	643620549	CCNA_02299
ddlB	D-alanine--D-alanine ligase (EC 6.3.2.4)	646311991	b0092	ftsI	division specific D,D-transpeptidase/cell division protein ftsI	643620900	CCNA_02643
ftsA	cell division protein FtsA	646311993	b0094	ftsK	DNA translocase FtsK	643622094	CCNA_03819
ftsB	cell division protein FtsB	646314710	b2748	ftsL	putative cell division protein	643620901	CCNA_02644
ftsE	cell division ATP-binding protein FtsE	646315429	b3463	ftsN	sporulation domain-containing protein	643620334	CCNA_02086
ftsI	peptidoglycan synthetase FtsI (EC 2.4.1.129)	646311983	b0084	ftsQ	cell division protein ftsQ	643620882	CCNA_02625
ftsK	DNA translocase FtsK	646312805	b0890	ftsW	cell division protein ftsW	643620892	CCNA_02635
ftsL	membrane bound cell division protein at septum containing leucine zipper motif	646311982	b0083	ftsX	cell division protein ftsX	643620550	CCNA_02300
ftsN	cell division protein FtsN	646315915	b3933	ftsZ	cell division protein FtsZ	643620880	CCNA_02623
ftsQ	membrane anchored protein involved in growth of wall at septum	646311992	b0093	fzlA	glutathione S-transferase family protein	643622029	CCNA_03754
ftsW	cell division-specific peptidoglycan biosynthesis regulator FtsW	646311988	b0089	mipZ	division plane positioning ATPase mipZ	643620494	CCNA_02246
ftsX	cell division protein FtsX	646315428	b3462	mraY	Phospho-N-acetylmuramoyl-pentapeptide-transferase (EC 2.7.8.13)	643620897	CCNA_02640
ftsZ	cell division protein FtsZ	646311994	b0095	mreB	rod shape-determining protein MreB	643619854	CCNA_01612
minC	septum site-determining protein MinC	646313094	b1176	mreC	rod shape-determining protein MreC	643619855	CCNA_01613
minD	septum site-determining protein MinD	646313093	b1175	mreD	rod shape-determining protein MreD	643619856	CCNA_01614
minE	cell division topological specificity factor MinE	646313092	b1174	murA	UDP-N-acetylglucosamine 1-carboxyvinyltransferase	643620689	CCNA_02435
mraY	Phospho-N-acetylmuramoyl-pentapeptide-transferase (EC 2.7.8.13)	646311986	b0087	murB	UDP-N-acetylmuramate dehydrogenase (EC 1.1.1.158)	643620885	CCNA_02628
mrcA/PBP1A	fused penicillin-binding protein 1a: murein transglycosylase/murein transpeptidase	646315362	b3396	murC	UDP-N-acetylmuramate--L-alanine ligase (EC 6.3.2.8)	643620886	CCNA_02629
mrcB/PBP1B	fused glycosyl transferase and transpeptidase (Pbp1b)	646312046	b0149	murD	UDP-N-acetylmuramoylalanine--D-glutamate ligase (EC 6.3.2.9)	643620896	CCNA_02639
mrdA/PBP2	cell elongation-specific peptidoglycan D,D-transpeptidase/peptidoglycan glycosyltransferase (EC 2.4.1.129)	646312548	b0635	murE	UDP-N-acetylmuramoylalanyl-D-glutamate--2,6-diaminopimelate ligase (EC 6.3.2.13)	643620899	CCNA_02642
mrdB/rodA	cell wall shape-determining protein (RodA)	646312547	b0634	murF	UDP-N-acetylmuramoyl-tripeptide--D-alanyl-D-alanine ligase (EC 6.3.2.10)	643620898	CCNA_02641
mreB	rod shape-determining protein MreB	646315216	b3251	murG	UDP-N-acetylglucosamine-N-acetylmuramylpentapeptide N-acetylglucosamine transferase	643620891	CCNA_02634
mreC	rod shape-determining protein MreC	646315215	b3250	murI	glutamate racemase (EC 5.1.1.3)	643622092	CCNA_03817
mreD	cell wall structural complex MreBCD transmembrane component MreD	646315214	b3249	murJ	murJ, mviN putative peptidoglycan lipid II flippase	643618284	CCNA_00063
murA	UDP-N-acetylglucosamine 1-carboxyvinyltransferase (EC 2.5.1.7)	646315154	b3189	PBP1A/mrcA	multimodular transpeptidase-transglycosylase PBP 1A	643619826	CCNA_01584
murB	UDP-N-acetylmuramate dehydrogenase (EC 1.1.1.158)	646315954	b3972	PBP2/mrdA	cell elongation specific D,D-transpeptidase	643619857	CCNA_01615
murC	UDP-N-acetylmuramate--L-alanine ligase (EC 6.3.2.8)	646311990	b0091	rodA/mrdB	cell elongation-specific peptidoglycan biosynthesis regulator RodA	643619858	CCNA_01616
murD	UDP-N-acetylmuramoylalanine--D-glutamate ligase (EC 6.3.2.9)	646311987	b0088	rodZ	transcriptional regulatory protein	643619118	CCNA_00893
murE	UDP-N-acetylmuramoylalanyl-D-glutamate--2,6-diaminopimelate ligase (EC 6.3.2.13)	646311984	b0085
murF	UDP-N-acetylmuramoyl-tripeptide--D-alanyl-D-alanine ligase (EC 6.3.2.10)	646311985	b0086
murG	UDP-N-acetylglucosamine-N-acetylmuramylpentapeptide N-acetylglucosamine transferase	646311989	b0090
murI	glutamate racemase (EC 5.1.1.3)	646315949	b3967
murJ	probable peptidoglycan lipid II flippase required for murein synthesis	646312983	b1069
rodZ	cytoskeletal protein required for MreB assembly	646314481	b2516
slmA	cell division inhibitor SlmA/transcriptional regulator, TetR family	646315622	b3641
zipA	cell division protein ZipA	646314375	b2412

## Sheet: Table S4
Genome Name	alr	amiA,B,C,D	dacA,B,C	ddl	ftsA	ftsB	ftsE	ftsI	ftsK	ftsL	ftsN	ftsQ	ftsW	ftsX	ftsZ	minC	minD	minE	mipZ	mraY	mreB	mreC	mreD	murA	murB	murC	murD	murE	murF	murG	murI	murJ	pbp2	pbp1a,b	rodA	rodZ	slmA	zipA
Coxiella burnetii 14160-001	Ga0259203_01_811717_812811	Ga0259203_01_1015556_1016755	Ga0259203_01_1081823_1083079	Ga0259203_01_1315999_1317120	Ga0259203_01_119454_120686	Ga0259203_01_1212809_1213078	Ga0259203_01_1802151_1802804	Ga0259203_01_100905_102563	Ga0259203_01_1171455_1173791	Ga0259203_01_100565_100912		Ga0259203_01_117915_118646	Ga0259203_01_111794_112912	Ga0259203_01_1802801_1803742	Ga0259203_01_120708_121868					Ga0259203_01_107355_108440	Ga0259203_01_1454773_1455831	Ga0259203_01_1453812_1454690	Ga0259203_01_1453318_1453806	Ga0259203_01_679575_680879	Ga0259203_01_116965_117915	Ga0259203_01_115548_116972	Ga0259203_01_110466_111794	Ga0259203_01_104544_106013	Ga0259203_01_106010_107350	Ga0259203_01_114512_115588	Ga0259203_01_258044_258886	Ga0259203_01_345324_346871	Ga0259203_01_490311_492158	Ga0259203_01_1778415_1780796	Ga0259203_01_489120_490268	Ga0259203_01_1071429_1072220		Ga0259203_01_478260_478937
Coxiella burnetii 14160-002	Ga0259050_01_1367757_1368851	Ga0259050_01_1222613_1223983	Ga0259050_01_1039007_1040263	Ga0259050_01_966777_967895	Ga0259050_01_118446_119678	Ga0259050_01_622059_622328	Ga0259050_01_407094_407747	Ga0259050_01_136569_138227	Ga0259050_01_1114175_1116511	Ga0259050_01_138220_138567		Ga0259050_01_120486_121217	Ga0259050_01_126220_127338	Ga0259050_01_406156_407097	Ga0259050_01_117264_118424					Ga0259050_01_130691_131776	Ga0259050_01_800974_802032	Ga0259050_01_802115_802993	Ga0259050_01_802999_803487	Ga0259050_01_1553832_1555136	Ga0259050_01_121217_122167	Ga0259050_01_122160_123557	Ga0259050_01_127338_128666	Ga0259050_01_133118_134587	Ga0259050_01_131781_133121	Ga0259050_01_123544_124620	Ga0259050_01_1933765_1934607	Ga0259050_01_891438_892985	Ga0259050_01_1725158_1727005	Ga0259050_01_419556_421937	Ga0259050_01_1727048_1728196	Ga0259050_01_1050086_1050877		Ga0259050_01_1738379_1739056
Coxiella burnetii 18430	Ga0258274_862	Ga0258274_1106	Ga0258274_1152	Ga0258274_1413	Ga0258274_134	Ga0258274_1303	Ga0258274_2016	Ga0258274_115	Ga0258274_1268	Ga0258274_114		Ga0258274_132	Ga0258274_126	Ga0258274_2017	Ga0258274_135					Ga0258274_121	Ga0258274_1547	Ga0258274_1546	Ga0258274_1545	Ga0258274_742	Ga0258274_131	Ga0258274_130	Ga0258274_125	Ga0258274_119	Ga0258274_120	Ga0258274_129	Ga0258274_296	Ga0258274_389	Ga0258274_540	Ga0258274_1887	Ga0258274_539	Ga0258274_1139		Ga0258274_531
Coxiella burnetii 2014-PE-15890	Ga0398147_01_1469630_1470724	Ga0398147_01_1319649_1320848	Ga0398147_01_1124861_1126117	Ga0398147_01_1047708_1048826	Ga0398147_01_133208_134440	Ga0398147_01_667517_667786	Ga0398147_01_436771_437424	Ga0398147_01_151331_152989	Ga0398147_01_1205617_1207974	Ga0398147_01_152982_153329		Ga0398147_01_135248_135979	Ga0398147_01_140982_142100	Ga0398147_01_435833_436774	Ga0398147_01_132026_133186					Ga0398147_01_145453_146538	Ga0398147_01_871864_872922	Ga0398147_01_873005_873883	Ga0398147_01_873889_874377	Ga0398147_01_1664019_1665323	Ga0398147_01_135979_136929	Ga0398147_01_136922_138319	Ga0398147_01_142100_143428	Ga0398147_01_147880_149349	Ga0398147_01_146543_147883	Ga0398147_01_138306_139382	Ga0398147_01_2070123_2070965	Ga0398147_01_966740_968287	Ga0398147_01_1850581_1852419	Ga0398147_01_450372_452753	Ga0398147_01_1852462_1853610	Ga0398147_01_1137091_1137882		Ga0398147_01_1863792_1864469
Coxiella burnetii 2574	Ga0258273_01_811397_812491	Ga0258273_01_1016815_1018014	Ga0258273_01_1067775_1069031	Ga0258273_01_1317568_1318686	Ga0258273_01_118544_119776	Ga0258273_01_1181317_1181586	Ga0258273_01_1897881_1898534	Ga0258273_01_99995_101653	Ga0258273_01_1223644_1225980	Ga0258273_01_99655_100002		Ga0258273_01_117005_117736	Ga0258273_01_110884_112002	Ga0258273_01_1898531_1899472	Ga0258273_01_119798_120958					Ga0258273_01_106445_107530	Ga0258273_01_1456343_1457401	Ga0258273_01_1455382_1456260	Ga0258273_01_1454888_1455376	Ga0258273_01_679254_680558	Ga0258273_01_116055_117005	Ga0258273_01_114665_116062	Ga0258273_01_109556_110884	Ga0258273_01_103634_105103	Ga0258273_01_105100_106440	Ga0258273_01_113602_114678	Ga0258273_01_257323_258165	Ga0258273_01_344625_346172	Ga0258273_01_489697_491544	Ga0258273_01_1780739_1783120	Ga0258273_01_488506_489654	Ga0258273_01_1057381_1058172		Ga0258273_01_477646_478323
Coxiella burnetii 3262	Ga0125201_121195	Ga0125201_121047	Ga0125201_12850	Ga0125201_12763	Ga0125201_122026	Ga0125201_12341	Ga0125201_1291	Ga0125201_122044	Ga0125201_12925	Ga0125201_122045		Ga0125201_122028	Ga0125201_122034	Ga0125201_1290	Ga0125201_122025					Ga0125201_122039	Ga0125201_12566	Ga0125201_12567	Ga0125201_12568	Ga0125201_121427	Ga0125201_122029	Ga0125201_122030	Ga0125201_122035	Ga0125201_122041	Ga0125201_122040	Ga0125201_122031	Ga0125201_121842	Ga0125201_12669	Ga0125201_121626	Ga0125201_12106	Ga0125201_121627	Ga0125201_12863		Ga0125201_121635
Coxiella burnetii 3345937	Ga0125130_111168	Ga0125130_111020	Ga0125130_11834	Ga0125130_11747	Ga0125130_111989	Ga0125130_11338	Ga0125130_1192	Ga0125130_112007	Ga0125130_11908	Ga0125130_112008		Ga0125130_111991	Ga0125130_111997	Ga0125130_1191	Ga0125130_111988					Ga0125130_112002	Ga0125130_11553	Ga0125130_11554	Ga0125130_11555	Ga0125130_111398	Ga0125130_111992	Ga0125130_111993	Ga0125130_111998	Ga0125130_112004	Ga0125130_112003	Ga0125130_111994	Ga0125130_111805	Ga0125130_11655	Ga0125130_111591	Ga0125130_11107	Ga0125130_111592	Ga0125130_11847		Ga0125130_111600
Coxiella burnetii 42785537	Ga0258889_01_1409932_1411026	Ga0258889_01_1263166_1264365	Ga0258889_01_1075651_1076907	Ga0258889_01_1001501_1002622	Ga0258889_01_123962_125194	Ga0258889_01_642545_642814	Ga0258889_01_420731_421384	Ga0258889_01_142085_143743	Ga0258889_01_1153058_1155394	Ga0258889_01_143736_144083		Ga0258889_01_126002_126733	Ga0258889_01_131736_132854	Ga0258889_01_419793_420734	Ga0258889_01_122780_123940					Ga0258889_01_136207_137292	Ga0258889_01_832541_833599	Ga0258889_01_833682_834560	Ga0258889_01_834566_835054	Ga0258889_01_1599402_1600706	Ga0258889_01_126733_127683	Ga0258889_01_127676_129073	Ga0258889_01_132854_134182	Ga0258889_01_138634_140103	Ga0258889_01_137297_138637	Ga0258889_01_129060_130136	Ga0258889_01_1988792_1989634	Ga0258889_01_924406_925953	Ga0258889_01_1776458_1778305	Ga0258889_01_433734_436115	Ga0258889_01_1778348_1779496	Ga0258889_01_1087231_1088022		Ga0258889_01_1789679_1790356
Coxiella burnetii 701CbB1	Ga0259337_01_811861_812955	Ga0259337_01_1016992_1018191	Ga0259337_01_1067952_1069208	Ga0259337_01_1317745_1318866	Ga0259337_01_119004_120236	Ga0259337_01_1181494_1181763	Ga0259337_01_1804772_1805425	Ga0259337_01_100455_102113	Ga0259337_01_1223821_1226157	Ga0259337_01_100115_100462		Ga0259337_01_117465_118196	Ga0259337_01_111344_112462	Ga0259337_01_1805422_1806363	Ga0259337_01_120258_121418					Ga0259337_01_106905_107990	Ga0259337_01_1456519_1457577	Ga0259337_01_1455558_1456436	Ga0259337_01_1455064_1455552	Ga0259337_01_679715_681019	Ga0259337_01_116515_117465	Ga0259337_01_115098_116522	Ga0259337_01_110016_111344	Ga0259337_01_104094_105563	Ga0259337_01_105560_106900	Ga0259337_01_114062_115138	Ga0259337_01_257783_258625	Ga0259337_01_345085_346632	Ga0259337_01_490157_492004	Ga0259337_01_1780835_1783216	Ga0259337_01_488966_490114	Ga0259337_01_1057558_1058349		Ga0259337_01_478106_478783
Coxiella burnetii CbCVIC1	Ga0259201_01_1399039_1400133	Ga0259201_01_1252771_1253970	Ga0259201_01_1065822_1067078	Ga0259201_01_992191_993309	Ga0259201_01_121526_122758	Ga0259201_01_638556_638825	Ga0259201_01_417890_418543	Ga0259201_01_139649_141307	Ga0259201_01_1142980_1145316	Ga0259201_01_141300_141647		Ga0259201_01_123566_124297	Ga0259201_01_129300_130418	Ga0259201_01_416952_417893	Ga0259201_01_120344_121504					Ga0259201_01_133771_134856	Ga0259201_01_824101_825159	Ga0259201_01_825242_826120	Ga0259201_01_826126_826614	Ga0259201_01_1589897_1591201	Ga0259201_01_124297_125247	Ga0259201_01_125240_126637	Ga0259201_01_130418_131746	Ga0259201_01_136198_137667	Ga0259201_01_134861_136201	Ga0259201_01_126624_127700	Ga0259201_01_1979186_1980028	Ga0259201_01_915532_917079	Ga0259201_01_1766102_1767949	Ga0259201_01_430582_432963	Ga0259201_01_1767992_1769140	Ga0259201_01_1078003_1078794		Ga0259201_01_1779323_1780000
Coxiella burnetii CbuG_Q212	CbuG_1133	CbuG_0918	CbuG_0751	CbuG_0670	CbuG_1876	CbuG_0348	CbuG_0014	CbuG_1894	CbuG_0817	CbuG_1895		CbuG_1878	CbuG_1883	CbuG_0015	CbuG_1875					CbuG_1888	CbuG_0537	CbuG_0538	CbuG_0539	CbuG_1252	CbuG_1879	CbuG_1880	CbuG_1884	CbuG_1890	CbuG_1889	CbuG_1881	CbuG_1707	CbuG_1617	CbuG_1446	CbuG_0261	CbuG_1447	CbuG_0762		CbuG_1455
Coxiella burnetii CbuK_Q154	CbuK_0736	CbuK_0954	CbuK_1122	CbuK_1202	CbuK_1914	CbuK_0338	CbuK_0012	CbuK_1932	CbuK_1056	CbuK_1933		CbuK_1916	CbuK_1921	CbuK_0013	CbuK_1913					CbuK_1926	CbuK_1702	CbuK_1701	CbuK_1700	CbuK_1504	CbuK_1917	CbuK_1918	CbuK_1922	CbuK_1928	CbuK_1927	CbuK_1919	CbuK_0495	CbuK_1670	CbuK_1288	CbuK_0186	CbuK_1289	CbuK_1109		CbuK_1297
Coxiella burnetii Dugway 5J108-111	COXBU7E912_0932	COXBU7E912_1188	COXBU7E912_1345	COXBU7E912_1427	COXBU7E912_1967	COXBU7E912_0328	COXBU7E912_0215	COXBU7E912_1989	COXBU7E912_1282	COXBU7E912_1990		COXBU7E912_1968	COXBU7E912_1974	COXBU7E912_0214	COXBU7E912_1966					COXBU7E912_1980	COXBU7E912_0515	COXBU7E912_0514	COXBU7E912_0513	COXBU7E912_0764	COXBU7E912_1970	COXBU7E912_1971	COXBU7E912_1975	COXBU7E912_1983	COXBU7E912_1982	COXBU7E912_1972	COXBU7E912_1783	COXBU7E912_1676	COXBU7E912_1513	COXBU7E912_0118	COXBU7E912_1514	COXBU7E912_1333		COXBU7E912_1523
Coxiella burnetii Heizberg	Ga0258433_01_933726_934820	Ga0258433_01_732312_733511	Ga0258433_01_1257272_1258528	Ga0258433_01_1329391_1330512	Ga0258433_01_190677_191909	Ga0258433_01_1647153_1647422	Ga0258433_01_1859823_1860476	Ga0258433_01_172140_173798	Ga0258433_01_1188045_1190381	Ga0258433_01_171800_172147		Ga0258433_01_189138_189869	Ga0258433_01_183029_184147	Ga0258433_01_1860473_1861414	Ga0258433_01_191931_193091					Ga0258433_01_178591_179676	Ga0258433_01_1469337_1470395	Ga0258433_01_1468376_1469254	Ga0258433_01_1467882_1468370	Ga0258433_01_1065580_1066884	Ga0258433_01_188188_189138	Ga0258433_01_186798_188195	Ga0258433_01_181701_183029	Ga0258433_01_175780_177249	Ga0258433_01_177246_178586	Ga0258433_01_185735_186811	Ga0258433_01_329750_330592	Ga0258433_01_416641_418188	Ga0258433_01_562066_563904	Ga0258433_01_1845625_1848006	Ga0258433_01_560875_562023	Ga0258433_01_1246640_1247431		Ga0258433_01_550016_550693
Coxiella burnetii Henzerling	Ga0259042_01_933614_934708	Ga0259042_01_732317_733516	Ga0259042_01_1257414_1258670	Ga0259042_01_1329533_1330654	Ga0259042_01_190677_191909	Ga0259042_01_1647395_1647664	Ga0259042_01_1860065_1860718	Ga0259042_01_172140_173798	Ga0259042_01_1188187_1190523	Ga0259042_01_171800_172147		Ga0259042_01_189138_189869	Ga0259042_01_183029_184147	Ga0259042_01_1860715_1861656	Ga0259042_01_191931_193091					Ga0259042_01_178591_179676	Ga0259042_01_1469479_1470537	Ga0259042_01_1468518_1469396	Ga0259042_01_1468024_1468512	Ga0259042_01_1065475_1066779	Ga0259042_01_188188_189138	Ga0259042_01_186771_188195	Ga0259042_01_181701_183029	Ga0259042_01_175780_177249	Ga0259042_01_177246_178586	Ga0259042_01_185735_186811	Ga0259042_01_329750_330592	Ga0259042_01_416646_418193	Ga0259042_01_562071_563909	Ga0259042_01_1845867_1848248	Ga0259042_01_560880_562028	Ga0259042_01_1246782_1247573		Ga0259042_01_550021_550698
Coxiella burnetii MSU Goat Q177	Ga0213579_01_691307_692401	Ga0213579_01_898851_900050	Ga0213579_01_1079668_1080924	Ga0213579_01_1154416_1155534	Ga0213579_01_1847487_1848719	Ga0213579_01_309023_309292	Ga0213579_01_13050_13703	Ga0213579_01_1865607_1867265	Ga0213579_01_1007205_1009541	Ga0213579_01_1867258_1867605		Ga0213579_01_1849525_1850256	Ga0213579_01_1855256_1856374	Ga0213579_01_13700_14641	Ga0213579_01_1846305_1847465					Ga0213579_01_1859729_1860814	Ga0213579_01_1645376_1646434	Ga0213579_01_1644415_1645293	Ga0213579_01_1643921_1644409	Ga0213579_01_1455096_1456400	Ga0213579_01_1850256_1851206	Ga0213579_01_1851199_1852596	Ga0213579_01_1856374_1857702	Ga0213579_01_1862156_1863625	Ga0213579_01_1860819_1862159	Ga0213579_01_1852583_1853659	Ga0213579_01_445976_446818	Ga0213579_01_1612201_1613748	Ga0213579_01_1245010_1246917	Ga0213579_01_168583_170964	Ga0213579_01_1246892_1248040	Ga0213579_01_1067980_1068771		Ga0213579_01_1258224_1258901
Coxiella burnetii Namibia	Ga0069333_12664	Ga0069333_12884	Ga0069333_121057	Ga0069333_121135	Ga0069333_121798	Ga0069333_12288	Ga0069333_1210	Ga0069333_121816	Ga0069333_12991	Ga0069333_121817		Ga0069333_121800	Ga0069333_121806	Ga0069333_1211	Ga0069333_121797					Ga0069333_121811	Ga0069333_121610	Ga0069333_121609	Ga0069333_121608	Ga0069333_121417	Ga0069333_121801	Ga0069333_121802	Ga0069333_121807	Ga0069333_121813	Ga0069333_121812	Ga0069333_121803	Ga0069333_12433	Ga0069333_121580	Ga0069333_121220	Ga0069333_12156	Ga0069333_121221	Ga0069333_121046		Ga0069333_121230
Coxiella burnetii Nine Mile phase I / RSA 493	CBU_0869	CBU_1085	CBU_1261	CBU_1338	CBU_0140	CBU_1673	CBU_1904	CBU_0118	CBU_1191	CBU_0117		CBU_0138	CBU_0132	CBU_1905	CBU_0141					CBU_0125	CBU_1471	CBU_1470	CBU_1469	CBU_0751	CBU_0137	CBU_0136	CBU_0131	CBU_0123	CBU_0124	CBU_0135	CBU_0298	CBU_0390	CBU_0550	CBU_1887	CBU_0549	CBU_1249		CBU_0541
Coxiella burnetii nine mile phase II	Ga0399267_01_1081938_1083032	Ga0399267_01_1288775_1289974	Ga0399267_01_1470223_1471479	Ga0399267_01_1545059_1546180	Ga0399267_01_401054_402286	Ga0399267_01_1869029_1869298	Ga0399267_01_100469_101122	Ga0399267_01_382504_384162	Ga0399267_01_1393022_1395358	Ga0399267_01_382164_382511		Ga0399267_01_399515_400246	Ga0399267_01_393394_394512	Ga0399267_01_101119_102060	Ga0399267_01_402308_403468					Ga0399267_01_388955_390040	Ga0399267_01_1684902_1685960	Ga0399267_01_1683941_1684819	Ga0399267_01_1683447_1683935	Ga0399267_01_949849_951153	Ga0399267_01_398565_399515	Ga0399267_01_397175_398572	Ga0399267_01_392066_393394	Ga0399267_01_386144_387613	Ga0399267_01_387610_388950	Ga0399267_01_396112_397188	Ga0399267_01_545531_546373	Ga0399267_01_633864_635411	Ga0399267_01_779872_781710	Ga0399267_01_85139_87520	Ga0399267_01_778681_779829	Ga0399267_01_1459827_1460618		Ga0399267_01_767817_768494
Coxiella burnetii RSA 331	COXBURSA331_A1082	COXBURSA331_A0843	COXBURSA331_A1408	COXBURSA331_A1490	COXBURSA331_A0229	COXBURSA331_A1864	COXBURSA331_A2109	COXBURSA331_A0207	COXBURSA331_A1343	COXBURSA331_A0206		COXBURSA331_A0228	COXBURSA331_A0222	COXBURSA331_A2110	COXBURSA331_A0230					COXBURSA331_A0216	COXBURSA331_A1648	COXBURSA331_A1647	COXBURSA331_A1646	COXBURSA331_A1201	COXBURSA331_A0226	COXBURSA331_A0225	COXBURSA331_A0221	COXBURSA331_A0213	COXBURSA331_A0214	COXBURSA331_A0224	COXBURSA331_A0404	COXBURSA331_A0502	COXBURSA331_A0664	COXBURSA331_A2091	COXBURSA331_A0663	COXBURSA331_A1394		COXBURSA331_A0654
Coxiella burnetii RSA 493	Ga0398891_01_797133_798227	Ga0398891_01_1003971_1005170	Ga0398891_01_1185419_1186675	Ga0398891_01_1260255_1261376	Ga0398891_01_126885_128117	Ga0398891_01_1580861_1581130	Ga0398891_01_1799327_1799980	Ga0398891_01_108335_109993	Ga0398891_01_1108218_1110554	Ga0398891_01_107995_108342		Ga0398891_01_125346_126077	Ga0398891_01_119225_120343	Ga0398891_01_1799977_1800918	Ga0398891_01_128139_129299					Ga0398891_01_114786_115871	Ga0398891_01_1400095_1401153	Ga0398891_01_1399134_1400012	Ga0398891_01_1398640_1399128	Ga0398891_01_665044_666348	Ga0398891_01_124396_125346	Ga0398891_01_123006_124403	Ga0398891_01_117897_119225	Ga0398891_01_111975_113444	Ga0398891_01_113441_114781	Ga0398891_01_121943_123019	Ga0398891_01_264819_265661	Ga0398891_01_353153_354700	Ga0398891_01_499161_500999	Ga0398891_01_1783997_1786378	Ga0398891_01_497970_499118	Ga0398891_01_1175023_1175814		Ga0398891_01_487106_487783
Coxiella burnetii Schperling	Ga0258908_01_474327_475421	Ga0258908_01_910348_911547	Ga0258908_01_1085087_1086343	Ga0258908_01_1158015_1159133	Ga0258908_01_1823298_1824530	Ga0258908_01_303671_303940	Ga0258908_01_4985_5638	Ga0258908_01_1841421_1843079	Ga0258908_01_1014775_1017111	Ga0258908_01_1843072_1843419		Ga0258908_01_1825338_1826069	Ga0258908_01_1831069_1832187	Ga0258908_01_5635_6576	Ga0258908_01_1822116_1823276					Ga0258908_01_1835542_1836627	Ga0258908_01_1612255_1613313	Ga0258908_01_1611294_1612172	Ga0258908_01_1610800_1611288	Ga0258908_01_337425_338729	Ga0258908_01_1826069_1827019	Ga0258908_01_1827012_1828409	Ga0258908_01_1832187_1833515	Ga0258908_01_1837969_1839438	Ga0258908_01_1836632_1837972	Ga0258908_01_1828396_1829472	Ga0258908_01_662123_662965	Ga0258908_01_1568408_1569955	Ga0258908_01_1235381_1237228	Ga0258908_01_144594_146975	Ga0258908_01_1237271_1238419	Ga0258908_01_1074398_1075189		Ga0258908_01_1248603_1249280
Coxiella burnetii Scurry_Q217	Ga0258734_01_1056655_1057749	Ga0258734_01_861022_862221	Ga0258734_01_689167_690423	Ga0258734_01_613849_614967	Ga0258734_01_1764958_1766190	Ga0258734_01_309257_309526	Ga0258734_01_6519_7172	Ga0258734_01_1783080_1784738	Ga0258734_01_764030_766366	Ga0258734_01_1784731_1785078		Ga0258734_01_1766998_1767729	Ga0258734_01_1772733_1773851	Ga0258734_01_7169_8110	Ga0258734_01_1763776_1764936					Ga0258734_01_1777203_1778288	Ga0258734_01_477116_478162	Ga0258734_01_478245_479123	Ga0258734_01_479129_479617	Ga0258734_01_1185630_1186934	Ga0258734_01_1767729_1768679	Ga0258734_01_1768672_1770069	Ga0258734_01_1773851_1775179	Ga0258734_01_1779630_1781099	Ga0258734_01_1778293_1779633	Ga0258734_01_1770056_1771132	Ga0258734_01_1616984_1617826	Ga0258734_01_1528774_1530321	Ga0258734_01_1369046_1370893	Ga0258734_01_235086_237467	Ga0258734_01_1370936_1372084	Ga0258734_01_700039_700839		Ga0258734_01_1382268_1382945
Buchnera aphidicola (Aphis fabae) Afa-UT1		Ga0439646_01_377934_378680		Ga0439646_01_6280_7212	Ga0439646_01_4638_5894	Ga0439646_01_225871_226071		Ga0439646_01_16173_17885		Ga0439646_01_17983_18228			Ga0439646_01_9743_10801		Ga0439646_01_3434_4588	Ga0439646_01_132559_133299	Ga0439646_01_131723_132535	Ga0439646_01_131469_131720		Ga0439646_01_12211_13287				Ga0439646_01_194844_196097	Ga0439646_01_455854_456897	Ga0439646_01_7217_8332	Ga0439646_01_10905_12221	Ga0439646_01_14649_16142		Ga0439646_01_8681_9742	Ga0439646_01_357054_357836	Ga0439646_01_136296_137825		Ga0439646_01_622103_624313
Buchnera aphidicola (Aphis glycines) BAg		Ga0081788_1146		Ga0081788_11419	Ga0081788_11420	Ga0081788_11208		Ga0081788_11409		Ga0081788_11408			Ga0081788_11416		Ga0081788_11421	Ga0081788_11305	Ga0081788_11306	Ga0081788_11307		Ga0081788_11414				Ga0081788_11245	Ga0081788_11591	Ga0081788_11418	Ga0081788_11415	Ga0081788_11411		Ga0081788_11417	Ga0081788_1167	Ga0081788_11299
Buchnera aphidicola (Aphis gossypii) Ago-UT1		Ga0439704_01_9294_10172		Ga0439704_01_271658_272590	Ga0439704_01_270053_271309	Ga0439704_01_488808_489008		Ga0439704_01_281534_283243		Ga0439704_01_283377_283502			Ga0439704_01_275122_276180		Ga0439704_01_268849_270003	Ga0439704_01_396202_396942	Ga0439704_01_395364_396176	Ga0439704_01_395110_395361		Ga0439704_01_277580_278656				Ga0439704_01_457896_459149	Ga0439704_01_86938_87984	Ga0439704_01_272603_273712	Ga0439704_01_276274_277590	Ga0439704_01_279990_281510		Ga0439704_01_274060_275121	Ga0439704_01_617713_618495	Ga0439704_01_399895_401448
Buchnera aphidicola (Cinara pseudotaxifoliae) BCipseudotaxifoliae/3056					Ga0175295_01_168885_170138										Ga0175295_01_167671_168828	Ga0175295_01_262046_262771	Ga0175295_01_261195_262007	Ga0175295_01_260947_261192										Ga0175295_01_170823_172301
Buchnera aphidicola (Diuraphis noxia)		Ga0175796_1146		Ga0175796_11421	Ga0175796_11422	Ga0175796_11211		Ga0175796_11411		Ga0175796_11410			Ga0175796_11417		Ga0175796_11423	Ga0175796_11306	Ga0175796_11307	Ga0175796_11308		Ga0175796_11415				Ga0175796_11248	Ga0175796_11595	Ga0175796_11419	Ga0175796_11416	Ga0175796_11412		Ga0175796_11418	Ga0175796_1169	Ga0175796_11300		Ga0175796_11436
Buchnera aphidicola 5A		BUAP5A_569			BUAP5A_210	BUAP5A_414		BUAP5A_218		BUAP5A_219			BUAP5A_213		BUAP5A_209	BUAP5A_320	BUAP5A_319	BUAP5A_318		BUAP5A_215				BUAP5A_379	BUAP5A_044	BUAP5A_211	BUAP5A_214	BUAP5A_217	BUAP5A_216	BUAP5A_212	BUAP5A_547	BUAP5A_327		BUAP5A_197
Buchnera aphidicola Aar		Ga0582956_01_603107_604093			Ga0582956_01_229816_231072	Ga0582956_01_453336_453569		Ga0582956_01_241171_242865		Ga0582956_01_242956_243207			Ga0582956_01_234716_235900		Ga0582956_01_228606_229760	Ga0582956_01_358463_359176	Ga0582956_01_357624_358436	Ga0582956_01_357370_357621		Ga0582956_01_237218_238291				Ga0582956_01_421457_422710	Ga0582956_01_48327_49118	Ga0582956_01_232161_233516	Ga0582956_01_235902_237218	Ga0582956_01_239647_241140		Ga0582956_01_233637_234719	Ga0582956_01_582152_582937	Ga0582956_01_362152_363693		Ga0582956_01_212361_213797
Buchnera aphidicola Acr				Ga0582926_01_232952_233884	Ga0582926_01_231340_232596	Ga0582926_01_451940_452140		Ga0582926_01_242849_244561		Ga0582926_01_244643_244891			Ga0582926_01_236415_237473		Ga0582926_01_230136_231290	Ga0582926_01_358897_359646	Ga0582926_01_358061_358873	Ga0582926_01_357807_358058		Ga0582926_01_238886_239962				Ga0582926_01_421020_422273	Ga0582926_01_47966_49012	Ga0582926_01_233881_235332	Ga0582926_01_237577_238896	Ga0582926_01_241324_242817		Ga0582926_01_235353_236414	Ga0582926_01_582202_582984	Ga0582926_01_362623_364140		Ga0582926_01_213932_216226
Buchnera aphidicola Ahe		Ga0582657_01_604486_605073		Ga0582657_01_233288_234220	Ga0582657_01_231696_232952	Ga0582657_01_452717_452917		Ga0582657_01_243187_244896		Ga0582657_01_244987_245235			Ga0582657_01_236758_237816		Ga0582657_01_230492_231646	Ga0582657_01_359462_360214	Ga0582657_01_358626_359438	Ga0582657_01_358372_358623		Ga0582657_01_239226_240302				Ga0582657_01_421584_422858	Ga0582657_01_48058_49101	Ga0582657_01_234217_235344	Ga0582657_01_237920_239236	Ga0582657_01_241637_243157		Ga0582657_01_235696_236757	Ga0582657_01_583557_584339	Ga0582657_01_363203_364738		Ga0582657_01_214334_216634
Buchnera aphidicola Ak		BAKON_584		BAKON_215	BAKON_214	BAKON_424		BAKON_223		BAKON_224			BAKON_218		BAKON_213	BAKON_329	BAKON_328	BAKON_327		BAKON_220					BAKON_045	BAKON_216	BAKON_219	BAKON_222		BAKON_217	BAKON_562	BAKON_335		BAKON_201
Buchnera aphidicola Ala		Ga0582691_01_612591_613148			Ga0582691_01_233996_235252	Ga0582691_01_458238_458453		Ga0582691_01_245343_247043		Ga0582691_01_247090_247344			Ga0582691_01_238866_240065		Ga0582691_01_232787_233941	Ga0582691_01_364240_364950	Ga0582691_01_363401_364213	Ga0582691_01_363147_363398		Ga0582691_01_241381_242454				Ga0582691_01_427870_429123	Ga0582691_01_48756_49814	Ga0582691_01_236315_237763	Ga0582691_01_240062_241381	Ga0582691_01_243808_245301		Ga0582691_01_237805_238869	Ga0582691_01_591035_591823	Ga0582691_01_367920_369461		Ga0582691_01_216394_218673
Buchnera aphidicola Ana		Ga0582181_01_600474_601337		Ga0582181_01_233004_233936	Ga0582181_01_231393_232649	Ga0582181_01_452093_452293		Ga0582181_01_242883_244592		Ga0582181_01_244729_244935			Ga0582181_01_236464_237528		Ga0582181_01_230189_231343	Ga0582181_01_358906_359646	Ga0582181_01_358068_358880	Ga0582181_01_357814_358065		Ga0582181_01_238925_240001				Ga0582181_01_421077_422342	Ga0582181_01_48040_49098	Ga0582181_01_233949_235058	Ga0582181_01_237619_238935	Ga0582181_01_241335_242858		Ga0582181_01_235406_236467	Ga0582181_01_581059_581841	Ga0582181_01_362592_364133
Buchnera aphidicola Ane				Ga0582459_01_232478_233413	Ga0582459_01_230921_232162	Ga0582459_01_450956_451156		Ga0582459_01_242376_244085		Ga0582459_01_244181_244432			Ga0582459_01_235950_237053		Ga0582459_01_229714_230871	Ga0582459_01_357993_358733	Ga0582459_01_357157_357969	Ga0582459_01_356903_357154		Ga0582459_01_238418_239494				Ga0582459_01_420021_421277	Ga0582459_01_47902_48954	Ga0582459_01_233410_234537	Ga0582459_01_237112_238428	Ga0582459_01_240856_242349		Ga0582459_01_234873_235949	Ga0582459_01_581504_582286	Ga0582459_01_361755_363281		Ga0582459_01_213554_215806
Buchnera aphidicola APS		BU576			BU213	BU421		BU222		BU223m			BU217		BU212	BU327	BU326	BU325		BU219				BU386	BU045	BU215	BU218	BU221	BU220	BU216	BU554	BU333		BU200
Buchnera aphidicola Bbr		Ga0581437_01_616217_616777		Ga0581437_01_238897_239814	Ga0581437_01_237362_238618	Ga0581437_01_463022_463225		Ga0581437_01_248806_250521		Ga0581437_01_250608_250862			Ga0581437_01_242379_243518		Ga0581437_01_236150_237304	Ga0581437_01_367968_368690	Ga0581437_01_367129_367941	Ga0581437_01_366875_367126		Ga0581437_01_244870_245940				Ga0581437_01_430981_432231	Ga0581437_01_49621_50679	Ga0581437_01_239819_241264	Ga0581437_01_243536_244870	Ga0581437_01_247268_248791		Ga0581437_01_241318_242382	Ga0581437_01_594769_595545	Ga0581437_01_371687_373228		Ga0581437_01_219702_222011
Buchnera aphidicola Bca		Ga0581698_01_613879_614436		Ga0581698_01_236551_237468	Ga0581698_01_235140_236396	Ga0581698_01_460778_460993		Ga0581698_01_246491_248197		Ga0581698_01_248339_248542			Ga0581698_01_240037_241218		Ga0581698_01_233922_235085	Ga0581698_01_365868_366590	Ga0581698_01_365032_365841	Ga0581698_01_364763_365029		Ga0581698_01_242531_243604				Ga0581698_01_428978_430228	Ga0581698_01_49662_50726	Ga0581698_01_237483_238913	Ga0581698_01_241215_242531	Ga0581698_01_244963_246456		Ga0581698_01_238976_240040	Ga0581698_01_592505_593287	Ga0581698_01_369606_371141		Ga0581698_01_217475_219685
Buchnera aphidicola Bciconfinis 2801					Ga0174946_01_169595_170842										Ga0174946_01_168381_169535	Ga0174946_01_258750_259457	Ga0174946_01_257904_258716	Ga0174946_01_257650_257901														Ga0174946_01_262342_263892
Buchnera aphidicola Bcifornacula 2912					Ga0175948_141										Ga0175948_140	Ga0175948_216	Ga0175948_215	Ga0175948_214
Buchnera aphidicola BTI		Ga0364986_173		Ga0364986_556	Ga0364986_557			Ga0364986_545		Ga0364986_544			Ga0364986_552		Ga0364986_558	Ga0364986_436	Ga0364986_437	Ga0364986_438		Ga0364986_550				Ga0364986_376	Ga0364986_92	Ga0364986_555	Ga0364986_551	Ga0364986_547		Ga0364986_553	Ga0364986_197	Ga0364986_430		Ga0364986_570
Buchnera aphidicola BTs Pazieg					Ga0175474_144										Ga0175474_143	Ga0175474_214	Ga0175474_213	Ga0175474_212														Ga0175474_220
Buchnera aphidicola BuCicuneomaculata/2628					Ga0443121_01_164225_165475										Ga0443121_01_163013_164167	Ga0443121_01_251546_252268	Ga0443121_01_250700_251512	Ga0443121_01_250449_250697										Ga0443121_01_165815_167308
Buchnera aphidicola BuCicurtihirsuta/3053					Ga0443033_01_164049_165299										Ga0443033_01_162846_163991	Ga0443033_01_253772_254497	Ga0443033_01_252922_253734	Ga0443033_01_252668_252919										Ga0443033_01_165959_167425				Ga0443033_01_257554_259107
Buchnera aphidicola BuCicurvipes/3402					Ga0443124_01_164328_165578										Ga0443124_01_163124_164269	Ga0443124_01_254074_254799	Ga0443124_01_253224_254036	Ga0443124_01_252970_253221										Ga0443124_01_166221_167687				Ga0443124_01_257857_259401
Buchnera aphidicola BuCikochiana/2762					Ga0443123_01_163848_165098										Ga0443123_01_162648_163790	Ga0443123_01_254449_255171	Ga0443123_01_253599_254411	Ga0443123_01_253351_253593
Buchnera aphidicola BuCilaricifoliae/3058					Ga0443275_01_165675_166925										Ga0443275_01_164462_165616	Ga0443275_01_256253_256975	Ga0443275_01_255400_256212	Ga0443275_01_255152_255394										Ga0443275_01_167323_168810
Buchnera aphidicola BuCipiceae/3303					Ga0443221_01_164376_165626										Ga0443221_01_163161_164318	Ga0443221_01_254416_255141	Ga0443221_01_253564_254376	Ga0443221_01_253310_253558										Ga0443221_01_166283_167749				Ga0443221_01_258113_259666
Buchnera aphidicola BuCisplendens/3004					Ga0443077_01_168338_169591										Ga0443077_01_167125_168282	Ga0443077_01_261175_261894	Ga0443077_01_260324_261136	Ga0443077_01_260076_260321										Ga0443077_01_170276_171754
Buchnera aphidicola BuCisplendens/pseudotsugae/3390					Ga0443272_01_168210_169463										Ga0443272_01_166996_168153	Ga0443272_01_260956_261681	Ga0443272_01_260104_260916	Ga0443272_01_259856_260101										Ga0443272_01_170152_171630
Buchnera aphidicola BuCistrobi/3249					Ga0349533_01_166330_167586										Ga0349533_01_165103_166266	Ga0349533_01_258102_258830	Ga0349533_01_257254_258066	Ga0349533_01_256991_257251
Buchnera aphidicola Cc					BCc_136										BCc_135	BCc_205	BCc_204	BCc_203
Buchnera aphidicola Ct					BCTU_140										BCTU_139	BCTU_213	BCTU_212	BCTU_211														BCTU_219
Buchnera aphidicola F009		BUMPF009_CDS00030		BUMPF009_CDS00380	BUMPF009_CDS00381	BUMPF009_CDS00178		BUMPF009_CDS00372					BUMPF009_CDS00377		BUMPF009_CDS00382	BUMPF009_CDS00266	BUMPF009_CDS00267	BUMPF009_CDS00268		BUMPF009_CDS00375				BUMPF009_CDS00211	BUMPF009_CDS00545	BUMPF009_CDS00379	BUMPF009_CDS00376	BUMPF009_CDS00373	BUMPF009_CDS00374	BUMPF009_CDS00378	BUMPF009_CDS00049	BUMPF009_CDS00263
Buchnera aphidicola G002		BUMPG002_CDS00030		BUMPG002_CDS00381	BUMPG002_CDS00382	BUMPG002_CDS00178		BUMPG002_CDS00373					BUMPG002_CDS00378		BUMPG002_CDS00383	BUMPG002_CDS00267	BUMPG002_CDS00268	BUMPG002_CDS00269		BUMPG002_CDS00376				BUMPG002_CDS00211	BUMPG002_CDS00546	BUMPG002_CDS00380	BUMPG002_CDS00377	BUMPG002_CDS00374	BUMPG002_CDS00375	BUMPG002_CDS00379	BUMPG002_CDS00049	BUMPG002_CDS00264
Buchnera aphidicola Hla		Ga0581432_01_611450_612301		Ga0581432_01_234777_235700	Ga0581432_01_233387_234643	Ga0581432_01_457620_457820		Ga0581432_01_244693_246399		Ga0581432_01_246517_246720			Ga0581432_01_238236_239411		Ga0581432_01_232179_233333	Ga0581432_01_362813_363526	Ga0581432_01_361974_362786	Ga0581432_01_361720_361971		Ga0581432_01_240729_241802				Ga0581432_01_425951_427204	Ga0581432_01_49121_50185	Ga0581432_01_235697_237085	Ga0581432_01_239413_240729	Ga0581432_01_243162_244655	Ga0581432_01_241786_243165	Ga0581432_01_237169_238239	Ga0581432_01_590489_591274	Ga0581432_01_366564_368099
Buchnera aphidicola Hta		Ga0581669_01_603925_604821		Ga0581669_01_231574_232509	Ga0581669_01_230170_231426			Ga0581669_01_241517_243232		Ga0581669_01_243342_243560			Ga0581669_01_235057_236298		Ga0581669_01_228959_230113	Ga0581669_01_359547_360272	Ga0581669_01_358708_359520	Ga0581669_01_358454_358705		Ga0581669_01_237583_238653				Ga0581669_01_422783_424033	Ga0581669_01_48826_49914	Ga0581669_01_232509_233963	Ga0581669_01_236252_237583	Ga0581669_01_240009_241505		Ga0581669_01_233996_235060	Ga0581669_01_582991_583773	Ga0581669_01_363297_364832		Ga0581669_01_212864_215155
Buchnera aphidicola JF99		CWS_02960			CWS_01120	CWS_02195		CWS_01175		CWS_01180			CWS_01150		CWS_01115	CWS_01705	CWS_01700	CWS_01695		CWS_01160				CWS_02030	CWS_00210	CWS_01135	CWS_01155	CWS_01170	CWS_01165	CWS_01145	CWS_02855	CWS_01725		CWS_01050
Buchnera aphidicola LL01		CWO_03015			CWO_01095	CWO_02210		CWO_01150					CWO_01120		CWO_01090	CWO_01715	CWO_01710	CWO_01705		CWO_01130				CWO_02035	CWO_00205	CWO_01110	CWO_01125	CWO_01145		CWO_01115	CWO_02910	CWO_01735		CWO_01020
Buchnera aphidicola LNK		Ga0337743_2		Ga0337743_388	Ga0337743_389	Ga0337743_174		Ga0337743_376		Ga0337743_375			Ga0337743_384		Ga0337743_390	Ga0337743_269	Ga0337743_270	Ga0337743_271		Ga0337743_382				Ga0337743_211	Ga0337743_567	Ga0337743_387	Ga0337743_383	Ga0337743_377		Ga0337743_385	Ga0337743_27	Ga0337743_263
Buchnera aphidicola Lps		Ga0582968_01_611455_611976		Ga0582968_01_235305_236228	Ga0582968_01_233813_235069	Ga0582968_01_459602_459817		Ga0582968_01_245277_246905		Ga0582968_01_247045_247248			Ga0582968_01_238797_239933		Ga0582968_01_232597_233754	Ga0582968_01_364371_365102	Ga0582968_01_363532_364344	Ga0582968_01_363278_363529		Ga0582968_01_241297_242367				Ga0582968_01_427529_428776	Ga0582968_01_49366_50409	Ga0582968_01_236249_237679	Ga0582968_01_239972_241297	Ga0582968_01_243695_245143		Ga0582968_01_237732_238796	Ga0582968_01_590047_590829	Ga0582968_01_367995_369539		Ga0582968_01_216336_218636
Buchnera aphidicola LSR1		Ga0248306_01_611875_612588			Ga0248306_01_233885_235141	Ga0248306_01_458091_458306		Ga0248306_01_245259_246908		Ga0248306_01_247130_247315			Ga0248306_01_238814_240013		Ga0248306_01_232673_233827	Ga0248306_01_363719_364432	Ga0248306_01_362880_363692	Ga0248306_01_362625_362876		Ga0248306_01_241332_242405				Ga0248306_01_427441_428691	Ga0248306_01_48983_50098	Ga0248306_01_236256_237710	Ga0248306_01_240010_241332	Ga0248306_01_243762_245258	Ga0248306_01_242389_243765	Ga0248306_01_237753_238817	Ga0248306_01_590550_591338	Ga0248306_01_367432_368967		Ga0248306_01_216301_218583
Buchnera aphidicola LSU		Ga0349650_01_28844_29425		Ga0349650_01_391213_392130	Ga0349650_01_392415_393671			Ga0349650_01_380999_382237		Ga0349650_01_380236_380436			Ga0349650_01_387614_388684		Ga0349650_01_393719_394879	Ga0349650_01_267003_267707	Ga0349650_01_267733_268545	Ga0349650_01_268548_268802		Ga0349650_01_385127_386209				Ga0349650_01_205755_207008		Ga0349650_01_390093_391223	Ga0349650_01_386199_387467	Ga0349650_01_382815_383768		Ga0349650_01_388674_389735	Ga0349650_01_48383_49168	Ga0349650_01_262457_264013
Buchnera aphidicola Meu		Ga0582397_01_615134_615937			Ga0582397_01_234690_235946	Ga0582397_01_460283_460522		Ga0582397_01_246031_247764		Ga0582397_01_247844_248047			Ga0582397_01_239567_240751		Ga0582397_01_233481_234635	Ga0582397_01_365387_366100	Ga0582397_01_364548_365360	Ga0582397_01_364294_364545		Ga0582397_01_242070_243143				Ga0582397_01_429153_430403	Ga0582397_01_49048_50106	Ga0582397_01_237018_238463	Ga0582397_01_240751_242070	Ga0582397_01_244502_245995		Ga0582397_01_238506_239570	Ga0582397_01_593741_594526	Ga0582397_01_369038_370573		Ga0582397_01_217146_219389
Buchnera aphidicola Mga		Ga0582904_01_613512_614300			Ga0582904_01_234273_235529	Ga0582904_01_459184_459423		Ga0582904_01_245621_247354		Ga0582904_01_247434_247637			Ga0582904_01_239148_240344		Ga0582904_01_233064_234218	Ga0582904_01_364452_365165	Ga0582904_01_363613_364425	Ga0582904_01_363359_363610		Ga0582904_01_241663_242736				Ga0582904_01_428200_429450	Ga0582904_01_48945_49994	Ga0582904_01_236599_238044	Ga0582904_01_240344_241663	Ga0582904_01_244092_245585		Ga0582904_01_238087_239151	Ga0582904_01_592171_592956	Ga0582904_01_368082_369617		Ga0582904_01_216768_219011
Buchnera aphidicola Msa				Ga0582186_01_225939_226871	Ga0582186_01_224523_225776	Ga0582186_01_442530_442736		Ga0582186_01_235891_237615		Ga0582186_01_237668_237913			Ga0582186_01_229422_230615		Ga0582186_01_223310_224464	Ga0582186_01_352623_353402	Ga0582186_01_351785_352597	Ga0582186_01_351517_351780		Ga0582186_01_231937_233013				Ga0582186_01_412681_413931	Ga0582186_01_48315_49373	Ga0582186_01_226884_228320	Ga0582186_01_230615_231937	Ga0582186_01_234373_235866	Ga0582186_01_232994_234376	Ga0582186_01_228349_229425	Ga0582186_01_571527_572318	Ga0582186_01_356348_357883		Ga0582186_01_207449_209518
Buchnera aphidicola Mst		Ga0582441_01_590173_590658		Ga0582441_01_225543_226472	Ga0582441_01_224197_225453	Ga0582441_01_443967_444251		Ga0582441_01_235516_237147		Ga0582441_01_237293_237547			Ga0582441_01_229029_229964		Ga0582441_01_222988_224142	Ga0582441_01_351444_352160	Ga0582441_01_350606_351418	Ga0582441_01_350351_350602		Ga0582441_01_231555_232628				Ga0582441_01_412777_414039	Ga0582441_01_45481_46494	Ga0582441_01_226477_227829	Ga0582441_01_230236_231555	Ga0582441_01_233986_235479	Ga0582441_01_232631_233989	Ga0582441_01_227968_229032	Ga0582441_01_569855_570634	Ga0582441_01_355304_356845
Buchnera aphidicola Rpa				Ga0582675_01_237107_238024	Ga0582675_01_235488_236744			Ga0582675_01_247014_248732		Ga0582675_01_248830_249039			Ga0582675_01_240589_241647		Ga0582675_01_234286_235440	Ga0582675_01_365976_366704	Ga0582675_01_365138_365950	Ga0582675_01_364884_365135		Ga0582675_01_243073_244140				Ga0582675_01_428674_429927	Ga0582675_01_49554_50276	Ga0582675_01_238043_239149	Ga0582675_01_241751_243073	Ga0582675_01_245459_246448		Ga0582675_01_239524_240588	Ga0582675_01_592668_593438	Ga0582675_01_369679_371223		Ga0582675_01_217951_220170
Buchnera aphidicola Sav		Ga0581648_01_606288_606845		Ga0581648_01_232187_233119	Ga0581648_01_230745_232001	Ga0581648_01_453403_453624		Ga0581648_01_242142_243854		Ga0581648_01_243951_244160			Ga0581648_01_235673_236872		Ga0581648_01_229530_230690	Ga0581648_01_359802_360515	Ga0581648_01_358962_359774	Ga0581648_01_358708_358959		Ga0581648_01_238191_239258				Ga0581648_01_422966_424219	Ga0581648_01_48826_49884	Ga0581648_01_233116_234570	Ga0581648_01_236869_238248	Ga0581648_01_240615_242108		Ga0581648_01_234612_235676	Ga0581648_01_584868_585656	Ga0581648_01_363451_364986
Buchnera aphidicola Sg		BUsg555		BUsg208	BUsg207	BUsg406		BUsg216		BUsg217			BUsg211		BUsg206	BUsg318	BUsg317	BUsg316						BUsg373	BUsg042		BUsg212			BUsg210	BUsg536	BUsg321
Buchnera aphidicola TLW03		CWQ_03060			CWQ_01145	CWQ_02245		CWQ_01200					CWQ_01175		CWQ_01140		CWQ_01740	CWQ_01735		CWQ_01185				CWQ_02080	CWQ_00225	CWQ_01160	CWQ_01180	CWQ_01195	CWQ_01190	CWQ_01170	CWQ_02945	CWQ_01765		CWQ_01075
Buchnera aphidicola Tuc7		BUAPTUC7_570			BUAPTUC7_212	BUAPTUC7_415		BUAPTUC7_220		BUAPTUC7_221			BUAPTUC7_215		BUAPTUC7_211	BUAPTUC7_321	BUAPTUC7_320	BUAPTUC7_319		BUAPTUC7_217				BUAPTUC7_380	BUAPTUC7_045	BUAPTUC7_213	BUAPTUC7_216	BUAPTUC7_219		BUAPTUC7_214	BUAPTUC7_548	BUAPTUC7_328		BUAPTUC7_199
Buchnera aphidicola Ua		BUAMB_549		BUAMB_197	BUAMB_196			BUAMB_205		BUAMB_206			BUAMB_200		BUAMB_195	BUAMB_307	BUAMB_306	BUAMB_305		BUAMB_202				BUAMB_362	BUAMB_044	BUAMB_198	BUAMB_201	BUAMB_204		BUAMB_199	BUAMB_528	BUAMB_313		BUAMB_186
Buchnera aphidicola USDA		BUMPUSDA_CDS00030		BUMPUSDA_CDS00380	BUMPUSDA_CDS00381	BUMPUSDA_CDS00178		BUMPUSDA_CDS00372					BUMPUSDA_CDS00377		BUMPUSDA_CDS00382	BUMPUSDA_CDS00266	BUMPUSDA_CDS00267	BUMPUSDA_CDS00268		BUMPUSDA_CDS00375				BUMPUSDA_CDS00211	BUMPUSDA_CDS00544	BUMPUSDA_CDS00379	BUMPUSDA_CDS00376	BUMPUSDA_CDS00373	BUMPUSDA_CDS00374	BUMPUSDA_CDS00378	BUMPUSDA_CDS00049	BUMPUSDA_CDS00263
Buchnera aphidicola W106		BUMPW106_CDS00030		BUMPW106_CDS00381	BUMPW106_CDS00382	BUMPW106_CDS00178		BUMPW106_CDS00372					BUMPW106_CDS00378		BUMPW106_CDS00383	BUMPW106_CDS00266	BUMPW106_CDS00267	BUMPW106_CDS00268		BUMPW106_CDS00376				BUMPW106_CDS00211	BUMPW106_CDS00545	BUMPW106_CDS00380	BUMPW106_CDS00377	BUMPW106_CDS00373		BUMPW106_CDS00379	BUMPW106_CDS00049	BUMPW106_CDS00263
Rickettsia africae ESF-5	RAF_ORF0118	RAF_ORF1244	RAF_ORF0498	RAF_ORF0310	RAF_ORF0312	RAF_ORF0548		RAF_ORF0778	RAF_ORF1167	RAF_ORF0779		RAF_ORF0311	RAF_ORF0523		RAF_ORF0920				RAF_ORF0174	RAF_ORF0825	RAF_ORF1089	RAF_ORF1088		RAF_ORF0800	RAF_ORF0309	RAF_ORF0308	RAF_ORF0522	RAF_ORF0827	RAF_ORF0826	RAF_ORF0524		RAF_ORF0815	RAF_ORF0776	RAF_ORF1136	RAF_ORF0351
Rickettsia akari Hartford	A1C_00730	A1C_06790	A1C_02925	A1C_01810	A1C_01820	A1C_03170		A1C_04395	A1C_06390	A1C_04400			A1C_03055		A1C_05145				A1C_01030	A1C_04660	A1C_06000	A1C_05995		A1C_04505	A1C_01805	A1C_01800	A1C_03050	A1C_04670	A1C_04665	A1C_03060		A1C_04585	A1C_04385	A1C_06240	A1C_01995
Rickettsia amblyommatis GAT-30V	MCE_01235	MCE_00405	MCE_03590	MCE_02370	MCE_02380	MCE_03830		MCE_04885	MCE_08000	MCE_04880		MCE_02375	MCE_03710		MCE_06620				MCE_01565	MCE_06075	MCE_07550	MCE_07545		MCE_04725	MCE_02365	MCE_02360	MCE_03705	MCE_06085	MCE_06080	MCE_03715		MCE_04645	MCE_04895	MCE_07825	MCE_02685
Rickettsia asembonensis NMRCii	Ga0248393_10286	Ga0248393_11529	Ga0248393_1081	Ga0248393_10520	Ga0248393_10522	Ga0248393_10445		Ga0248393_1425	Ga0248393_17714	Ga0248393_1424		Ga0248393_10521	Ga0248393_10427		Ga0248393_1133				Ga0248393_10221	Ga0248393_1362	Ga0248393_17451	Ga0248393_17452		Ga0248393_11128	Ga0248393_10519	Ga0248393_10518	Ga0248393_10426	Ga0248393_1364	Ga0248393_1363	Ga0248393_10428		Ga0248393_1118	Ga0248393_1428	Ga0248393_1745	Ga0248393_17545
Rickettsia australis Cutlack	MC5_00130	MC5_01015	MC5_05155	MC5_06280	MC5_06270	MC5_04910		MC5_03665	MC5_01410	MC5_03650			MC5_05035		MC5_02755				MC5_07135	MC5_03315	MC5_01850	MC5_01855		MC5_03460	MC5_06285	MC5_06290	MC5_05040	MC5_03305	MC5_03310	MC5_05030		MC5_03385	MC5_03665	MC5_01610	MC5_06080
Rickettsia bellii An04	Ga0198641_11242		Ga0198641_11876	Ga0198641_11847	Ga0198641_11850	Ga0198641_111041		Ga0198641_111222	Ga0198641_111546	Ga0198641_111223		Ga0198641_11848	Ga0198641_11746		Ga0198641_11654				Ga0198641_11535	Ga0198641_11776	Ga0198641_1116	Ga0198641_1115		Ga0198641_11811	Ga0198641_11846	Ga0198641_11845	Ga0198641_11744	Ga0198641_11778	Ga0198641_11777	Ga0198641_11747		Ga0198641_11987	Ga0198641_11302	Ga0198641_1141	Ga0198641_11701
Rickettsia bellii OSU 85-389	A1I_00855		A1I_04005	A1I_03850	A1I_03870	A1I_04840		A1I_03100	A1I_07115	A1I_03095		A1I_03855	A1I_02495		A1I_01985				A1I_06020	A1I_02650	A1I_07265	A1I_07255		A1I_03685	A1I_03845	A1I_03840	A1I_02485	A1I_02660	A1I_02655	A1I_02500		A1I_04570	A1I_01180	A1I_07390	A1I_02245
Rickettsia bellii RML369-C	RBE_1339		RBE_0931	RBE_0961	RBE_0958	RBE_0747		RBE_1223	RBE_0154	RBE_0541		RBE_0960	RBE_0879		RBE_1071				RBE_0350	RBE_0854	RBE_0131	RBE_0132		RBE_0994	RBE_0962	RBE_0963	RBE_0881	RBE_0852	RBE_0853	RBE_0878		RBE_0696	RBE_1223	RBE_0108	RBE_1026
Rickettsia canadensis CA410	RCA_00440	RCA_05220	RCA_03125	RCA_01355	RCA_01365	RCA_02935		RCA_01960	RCA_04900	RCA_01955		RCA_01360	RCA_03010		RCA_04050				RCA_00715	RCA_01745	RCA_04570	RCA_04565		RCA_01855	RCA_01350	RCA_01345	RCA_03020	RCA_01735	RCA_01740	RCA_03005		RCA_01790	RCA_01970	RCA_04760	RCA_03885
Rickettsia canadensis McKiel	A1E_00455	A1E_05615	A1E_03445	A1E_01430	A1E_01440	A1E_03240		A1E_02085	A1E_05275	A1E_02070		A1E_01435	A1E_03315		A1E_04405				A1E_00735	A1E_01855	A1E_04935	A1E_04930		A1E_01970	A1E_01425	A1E_01420	A1E_03330	A1E_01845	A1E_01850	A1E_03310		A1E_01905	A1E_02085	A1E_05135	A1E_04235
Rickettsia conorii heilongjiangensis 054	Rh054_00755	Rh054_07385	Rh054_03060	Rh054_01905	Rh054_01915	Rh054_03320		Rh054_04650	Rh054_06930	Rh054_04670		Rh054_01910	Rh054_03185		Rh054_05585				Rh054_01085	Rh054_05020	Rh054_06520	Rh054_06515		Rh054_04880	Rh054_01900	Rh054_01895	Rh054_03180	Rh054_05030	Rh054_05025	Rh054_03190		Rh054_04955	Rh054_04650	Rh054_06770	Rh054_02175
Rickettsia conorii heilongjiangensis CH8-1	Ga0439634_01_128879_129946	Ga0439634_01_1266212_1266955	Ga0439634_01_534311_535231	Ga0439634_01_340615_341580	Ga0439634_01_342508_343743	Ga0439634_01_583745_584050		Ga0439634_01_807547_809328	Ga0439634_01_1193153_1195387	Ga0439634_01_812490_812888		Ga0439634_01_341577_342380	Ga0439634_01_560231_561364		Ga0439634_01_956253_957611				Ga0439634_01_196430_197230	Ga0439634_01_865829_866914	Ga0439634_01_1106524_1107564	Ga0439634_01_1105682_1106521		Ga0439634_01_840263_841522	Ga0439634_01_339554_340477	Ga0439634_01_337913_339370	Ga0439634_01_558603_560099	Ga0439634_01_868560_869999	Ga0439634_01_867109_868458	Ga0439634_01_561361_562512		Ga0439634_01_854965_856620	Ga0439634_01_807547_809328	Ga0439634_01_1164926_1167298	Ga0439634_01_381694_382794
Rickettsia conorii heilongjiangensis HCN-13	Ga0439858_01_128874_129941	Ga0439858_01_1266201_1266944	Ga0439858_01_534307_535227	Ga0439858_01_340611_341576	Ga0439858_01_342504_343739	Ga0439858_01_583740_584045		Ga0439858_01_807544_809325	Ga0439858_01_1193143_1195377	Ga0439858_01_812487_812885		Ga0439858_01_341573_342376	Ga0439858_01_560226_561359		Ga0439858_01_956244_957602				Ga0439858_01_196425_197225	Ga0439858_01_865820_866905	Ga0439858_01_1106514_1107554	Ga0439858_01_1105672_1106511		Ga0439858_01_840260_841519	Ga0439858_01_339550_340473	Ga0439858_01_337909_339366	Ga0439858_01_558598_560094	Ga0439858_01_868551_869990	Ga0439858_01_867100_868449	Ga0439858_01_561356_562507		Ga0439858_01_854962_856617	Ga0439858_01_807544_809325	Ga0439858_01_1164916_1167288	Ga0439858_01_381690_382790
Rickettsia conorii heilongjiangensis Sendai-58	Ga0439534_01_128874_129941	Ga0439534_01_1266201_1266944	Ga0439534_01_534307_535227	Ga0439534_01_340611_341576	Ga0439534_01_342504_343739	Ga0439534_01_583740_584045		Ga0439534_01_810457_812142	Ga0439534_01_1193143_1195377	Ga0439534_01_812487_812885		Ga0439534_01_341573_342376	Ga0439534_01_560226_561359		Ga0439534_01_956244_957602				Ga0439534_01_196425_197225	Ga0439534_01_865820_866905	Ga0439534_01_1106514_1107554	Ga0439534_01_1105672_1106511		Ga0439534_01_840260_841519	Ga0439534_01_339550_340473	Ga0439534_01_337909_339366	Ga0439534_01_558598_560094	Ga0439534_01_868551_869990	Ga0439534_01_867100_868449	Ga0439534_01_561356_562507		Ga0439534_01_854962_856617	Ga0439534_01_807544_809325	Ga0439534_01_1164916_1167288	Ga0439534_01_381690_382790
Rickettsia conorii Malish 7	RC0128	RC1358	RC0536	RC0333	RC0335	RC0588		RC0852	RC1274	RC0856		RC0334	RC0561		RC1015				RC0185	RC0910	RC1198	RC1197		RC0883	RC0332	RC0331	RC0560	RC0912	RC0911	RC0562		RC0898	RC0852	RC1245	RC0376
Rickettsia conorii raoultii IM16	Ga0198961_111444	Ga0198961_111277	Ga0198961_11332	Ga0198961_11103	Ga0198961_11105	Ga0198961_11664		Ga0198961_11721	Ga0198961_111185	Ga0198961_11725		Ga0198961_11104	Ga0198961_11358		Ga0198961_11907				Ga0198961_111510	Ga0198961_11789	Ga0198961_111098	Ga0198961_111097		Ga0198961_11760	Ga0198961_11102	Ga0198961_11101	Ga0198961_11357	Ga0198961_11791	Ga0198961_11790	Ga0198961_11359		Ga0198961_11779	Ga0198961_11721	Ga0198961_111150	Ga0198961_11160
Rickettsia conorii raoultii Khabarovsk	Ga0174994_121424	Ga0174994_121258	Ga0174994_12324	Ga0174994_12101	Ga0174994_12103	Ga0174994_12652		Ga0174994_12710	Ga0174994_121169	Ga0174994_12714		Ga0174994_12102	Ga0174994_12350		Ga0174994_12893				Ga0174994_121489	Ga0174994_12777	Ga0174994_121084	Ga0174994_121083		Ga0174994_12750	Ga0174994_12100	Ga0174994_1299	Ga0174994_12349	Ga0174994_12779	Ga0174994_12778	Ga0174994_12351		Ga0174994_12768	Ga0174994_12710	Ga0174994_121135	Ga0174994_12157
Rickettsia endosymbiont of Bemisia tabaci MEAM1	Ga0263983_11794		Ga0263983_11169	Ga0263983_11200	Ga0263983_11198	Ga0263983_11805		Ga0263983_111298	Ga0263983_111052	Ga0263983_11388		Ga0263983_11199	Ga0263983_1178		Ga0263983_111481				Ga0263983_111093	Ga0263983_11699	Ga0263983_111112	Ga0263983_111113		Ga0263983_11287	Ga0263983_11201	Ga0263983_11202	Ga0263983_1176	Ga0263983_11611	Ga0263983_11610	Ga0263983_1179		Ga0263983_11477	Ga0263983_111298	Ga0263983_111099	Ga0263983_11122
Rickettsia felis URRWXCal2	RF_0079	RF_1384	RF_0609	RF_1035	RF_1033	RF_0654		RF_0900	RF_1307	RF_0903		RF_1034	RF_0635		RF_0270				RF_1142	RF_0370	RF_1232	RF_1231		RF_0945	RF_1036	RF_1037	RF_0634	RF_0368	RF_0369	RF_0636		RF_0963	RF_0900	RF_1276	RF_0453
Rickettsia heilongjiangensis Sendai-29	Ga0439573_01_128874_129941	Ga0439573_01_1266201_1266944	Ga0439573_01_534307_535227	Ga0439573_01_340611_341576	Ga0439573_01_342504_343739	Ga0439573_01_583740_584045		Ga0439573_01_807544_809325	Ga0439573_01_1193143_1195377	Ga0439573_01_812487_812885		Ga0439573_01_341573_342376	Ga0439573_01_560226_561359		Ga0439573_01_956244_957602				Ga0439573_01_196425_197225	Ga0439573_01_865820_866905	Ga0439573_01_1106514_1107554	Ga0439573_01_1105672_1106511		Ga0439573_01_840260_841519	Ga0439573_01_339550_340473	Ga0439573_01_337909_339366	Ga0439573_01_558598_560094	Ga0439573_01_868551_869990	Ga0439573_01_867100_868449	Ga0439573_01_561356_562507		Ga0439573_01_854962_856617	Ga0439573_01_807544_809325	Ga0439573_01_1164916_1167288	Ga0439573_01_381690_382790
Rickettsia helvetica C9P9	Ga0046287_00683	Ga0046287_00489	Ga0046287_01146	Ga0046287_00910	Ga0046287_00912	Ga0046287_01204		Ga0046287_01540	Ga0046287_00398	Ga0046287_01541			Ga0046287_01175		Ga0046287_00111				Ga0046287_00745	Ga0046287_01600	Ga0046287_00309	Ga0046287_00308		Ga0046287_01565	Ga0046287_00909	Ga0046287_00908	Ga0046287_01174	Ga0046287_01603	Ga0046287_01601	Ga0046287_01177		Ga0046287_01582	Ga0046287_01536	Ga0046287_00359	Ga0046287_00951
Rickettsia japonica DT-1	Ga0263585_111380	Ga0263585_111213	Ga0263585_11349	Ga0263585_11125	Ga0263585_11127	Ga0263585_11403		Ga0263585_11662	Ga0263585_111124	Ga0263585_11663		Ga0263585_11126	Ga0263585_11376		Ga0263585_11852				Ga0263585_111442	Ga0263585_11737	Ga0263585_111044	Ga0263585_111043		Ga0263585_11707	Ga0263585_11124	Ga0263585_11123	Ga0263585_11375	Ga0263585_11739	Ga0263585_11738	Ga0263585_11377		Ga0263585_11724	Ga0263585_11659	Ga0263585_111094	Ga0263585_11176
Rickettsia japonica HH06154	Ga0263694_111381	Ga0263694_111215	Ga0263694_11350	Ga0263694_11125	Ga0263694_11127	Ga0263694_11404		Ga0263694_11660	Ga0263694_111126	Ga0263694_11664		Ga0263694_11126	Ga0263694_11377		Ga0263694_11853				Ga0263694_111443	Ga0263694_11738	Ga0263694_111046	Ga0263694_111045		Ga0263694_11708	Ga0263694_11124	Ga0263694_11123	Ga0263694_11376	Ga0263694_11740	Ga0263694_11739	Ga0263694_11378		Ga0263694_11725	Ga0263694_11660	Ga0263694_111096	Ga0263694_11176
Rickettsia japonica HH07124	Ga0263911_111379	Ga0263911_111212	Ga0263911_11349	Ga0263911_11125	Ga0263911_11127	Ga0263911_11403		Ga0263911_11662	Ga0263911_111123	Ga0263911_11663		Ga0263911_11126	Ga0263911_11376		Ga0263911_11852				Ga0263911_111441	Ga0263911_11737	Ga0263911_111043	Ga0263911_111042		Ga0263911_11707	Ga0263911_11124	Ga0263911_11123	Ga0263911_11375	Ga0263911_11739	Ga0263911_11738	Ga0263911_11377		Ga0263911_11724	Ga0263911_11659	Ga0263911_111093	Ga0263911_11176
Rickettsia japonica HH07167	Ga0264124_111379	Ga0264124_111212	Ga0264124_11349	Ga0264124_11125	Ga0264124_11127	Ga0264124_11403		Ga0264124_11659	Ga0264124_111123	Ga0264124_11663		Ga0264124_11126	Ga0264124_11376		Ga0264124_11852				Ga0264124_111441	Ga0264124_11737	Ga0264124_111043	Ga0264124_111042		Ga0264124_11707	Ga0264124_11124	Ga0264124_11123	Ga0264124_11375	Ga0264124_11739	Ga0264124_11738	Ga0264124_11377		Ga0264124_11724	Ga0264124_11659	Ga0264124_111093	Ga0264124_11176
Rickettsia japonica HH-1	Ga0263299_111377	Ga0263299_111211	Ga0263299_11348	Ga0263299_11124	Ga0263299_11126	Ga0263299_11402		Ga0263299_11658	Ga0263299_111122	Ga0263299_11662		Ga0263299_11125	Ga0263299_11375		Ga0263299_11851				Ga0263299_111439	Ga0263299_11736	Ga0263299_111042	Ga0263299_111041		Ga0263299_11706	Ga0263299_11123	Ga0263299_11122	Ga0263299_11374	Ga0263299_11738	Ga0263299_11737	Ga0263299_11376		Ga0263299_11723	Ga0263299_11658	Ga0263299_111092	Ga0263299_11175
Rickettsia japonica LA4/2015	Ga0399042_153	Ga0399042_1508	Ga0399042_611	Ga0399042_382	Ga0399042_384	Ga0399042_669		Ga0399042_937	Ga0399042_1417	Ga0399042_941		Ga0399042_383	Ga0399042_638		Ga0399042_1138				Ga0399042_215	Ga0399042_1016	Ga0399042_1336	Ga0399042_1335		Ga0399042_986	Ga0399042_381	Ga0399042_380	Ga0399042_637	Ga0399042_1018	Ga0399042_1017	Ga0399042_639		Ga0399042_1003	Ga0399042_937	Ga0399042_1387	Ga0399042_434
Rickettsia japonica MZ08014	Ga0263682_111378	Ga0263682_111212	Ga0263682_11348	Ga0263682_11124	Ga0263682_11126	Ga0263682_11402		Ga0263682_11658	Ga0263682_111123	Ga0263682_11662		Ga0263682_11125	Ga0263682_11375		Ga0263682_11851				Ga0263682_111440	Ga0263682_11736	Ga0263682_111043	Ga0263682_111042		Ga0263682_11706	Ga0263682_11123	Ga0263682_11122	Ga0263682_11374	Ga0263682_11738	Ga0263682_11737	Ga0263682_11376		Ga0263682_11723	Ga0263682_11658	Ga0263682_111093	Ga0263682_11175
Rickettsia japonica Nakase	Ga0263679_111379	Ga0263679_111212	Ga0263679_11349	Ga0263679_11125	Ga0263679_11127	Ga0263679_11403		Ga0263679_11662	Ga0263679_111123	Ga0263679_11663		Ga0263679_11126	Ga0263679_11376		Ga0263679_11852				Ga0263679_111441	Ga0263679_11737	Ga0263679_111043	Ga0263679_111042		Ga0263679_11707	Ga0263679_11124	Ga0263679_11123	Ga0263679_11375	Ga0263679_11739	Ga0263679_11738	Ga0263679_11377		Ga0263679_11724	Ga0263679_11659	Ga0263679_111093	Ga0263679_11176
Rickettsia japonica OHH-1	Ga0264128_111375	Ga0264128_111208	Ga0264128_11348	Ga0264128_11124	Ga0264128_11126	Ga0264128_11402		Ga0264128_11660	Ga0264128_111119	Ga0264128_11661		Ga0264128_11125	Ga0264128_11375		Ga0264128_11850				Ga0264128_111437	Ga0264128_11735	Ga0264128_111041	Ga0264128_111040		Ga0264128_11705	Ga0264128_11123	Ga0264128_11122	Ga0264128_11374	Ga0264128_11737	Ga0264128_11736	Ga0264128_11376		Ga0264128_11722	Ga0264128_11657	Ga0264128_111090	Ga0264128_11175
Rickettsia japonica PO-1	Ga0263673_111377	Ga0263673_111211	Ga0263673_11348	Ga0263673_11124	Ga0263673_11126	Ga0263673_11402		Ga0263673_11661	Ga0263673_111122	Ga0263673_11662		Ga0263673_11125	Ga0263673_11375		Ga0263673_11851				Ga0263673_111439	Ga0263673_11736	Ga0263673_111042	Ga0263673_111041		Ga0263673_11706	Ga0263673_11123	Ga0263673_11122	Ga0263673_11374	Ga0263673_11738	Ga0263673_11737	Ga0263673_11376		Ga0263673_11723	Ga0263673_11658	Ga0263673_111092	Ga0263673_11175
Rickettsia japonica Tsuneishi	Ga0263571_111379	Ga0263571_111212	Ga0263571_11349	Ga0263571_11125	Ga0263571_11127	Ga0263571_11403		Ga0263571_11659	Ga0263571_111123	Ga0263571_11663		Ga0263571_11126	Ga0263571_11376		Ga0263571_11852				Ga0263571_111441	Ga0263571_11737	Ga0263571_111043	Ga0263571_111042		Ga0263571_11707	Ga0263571_11124	Ga0263571_11123	Ga0263571_11375	Ga0263571_11739	Ga0263571_11738	Ga0263571_11377		Ga0263571_11724	Ga0263571_11659	Ga0263571_111093	Ga0263571_11176
Rickettsia japonica YH	RJP_0097	RJP_1001	RJP_0420	RJP_0264	RJP_0266	RJP_0454		RJP_0625	RJP_0934	RJP_0629		RJP_0265	RJP_0440		RJP_0770				RJP_0147	RJP_0718	RJP_0882	RJP_0881		RJP_0658	RJP_0263	RJP_0262		RJP_0716	RJP_0717	RJP_0441		RJP_0725	RJP_0625	RJP_0918	RJP_0298
Rickettsia japonica YH_M	Ga0263879_111379	Ga0263879_111212	Ga0263879_11349	Ga0263879_11125	Ga0263879_11127	Ga0263879_11403		Ga0263879_11662	Ga0263879_111123	Ga0263879_11663		Ga0263879_11126	Ga0263879_11376		Ga0263879_11852				Ga0263879_111441	Ga0263879_11737	Ga0263879_111043	Ga0263879_111042		Ga0263879_11707	Ga0263879_11124	Ga0263879_11123	Ga0263879_11375	Ga0263879_11739	Ga0263879_11738	Ga0263879_11377		Ga0263879_11724	Ga0263879_11659	Ga0263879_111093	Ga0263879_11176
Rickettsia massiliae AZT80	RMB_00525	RMB_07120	RMB_05335	RMB_06475	RMB_06465	RMB_05090		RMB_03675	RMB_06830	RMB_03670		RMB_06470	RMB_05205		RMB_02880				RMB_01060	RMB_03415	RMB_01940	RMB_01945		RMB_03555	RMB_06480	RMB_06485	RMB_05210	RMB_03405	RMB_03410	RMB_05200		RMB_03480	RMB_03690	RMB_01700	RMB_06205
Rickettsia massiliae MTU5	RMA_0134	RMA_1348	RMA_0553	RMA_0341	RMA_0343	RMA_0604		RMA_0891	RMA_1298	RMA_0894		RMA_0342	RMA_0578		RMA_1048				RMA_0193	RMA_0942	RMA_1213	RMA_1212		RMA_0916	RMA_0340	RMA_0339	RMA_0577	RMA_0944	RMA_0943	RMA_0579		RMA_0931	RMA_0891	RMA_1261	RMA_0387
Rickettsia montanensis OSU 85-930	MCI_04845	MCI_04080	MCI_06890	MCI_05875	MCI_05885	MCI_00055		MCI_01500	MCI_03645	MCI_01505		MCI_05880	MCI_07020		MCI_02280				MCI_05130	MCI_01755	MCI_03210	MCI_03205		MCI_01620	MCI_05870	MCI_05865	MCI_07015	MCI_01765	MCI_01760	MCI_07025		MCI_01700	MCI_01490	MCI_03475	MCI_06080
Rickettsia parkeri Atlantic Rainforest	Ga0397843_01_124041_125108	Ga0397843_01_1334766_1335509	Ga0397843_01_529695_530615	Ga0397843_01_335644_336609	Ga0397843_01_337537_338772	Ga0397843_01_579785_580090		Ga0397843_01_888419_890101	Ga0397843_01_1260098_1262332	Ga0397843_01_890445_890843		Ga0397843_01_336606_337409	Ga0397843_01_555613_556761		Ga0397843_01_1021601_1022959				Ga0397843_01_191010_191810	Ga0397843_01_936284_937369	Ga0397843_01_1169795_1170835	Ga0397843_01_1168953_1169792		Ga0397843_01_911024_912283	Ga0397843_01_334477_335400	Ga0397843_01_332924_334381	Ga0397843_01_553994_555496	Ga0397843_01_939125_940564	Ga0397843_01_937567_938916	Ga0397843_01_556758_557888		Ga0397843_01_925805_927472	Ga0397843_01_885508_887289	Ga0397843_01_1226773_1229046	Ga0397843_01_377062_378162
Rickettsia parkeri Portsmouth	MC1_00720	MC1_07520	MC1_03030	MC1_01870	MC1_01880	MC1_03330		MC1_04800	MC1_07045	MC1_04820		MC1_01875	MC1_03155		MC1_05665				MC1_01035	MC1_05090	MC1_06620	MC1_06615		MC1_04960	MC1_01865	MC1_01860	MC1_03150	MC1_05100	MC1_05095	MC1_03160		MC1_05035	MC1_04800	MC1_06865	MC1_02130
Rickettsia peacockii Rustic	RPR_02750	RPR_07685	RPR_05845	RPR_02150	RPR_02160	RPR_05575		RPR_03745	RPR_05135	RPR_03740		RPR_02155	RPR_05720		RPR_06280				RPR_03935	RPR_04140	RPR_03030	RPR_03035		RPR_03515	RPR_02145	RPR_02140	RPR_05725	RPR_04130	RPR_04135	RPR_05715		RPR_03580	RPR_03760	RPR_05485	RPR_04190
Rickettsia philipii 364D	RSA_00695	RSA_07495	RSA_02985	RSA_01850	RSA_01860	RSA_03265		RSA_04765	RSA_07035	RSA_04770		RSA_01855	RSA_03105		RSA_05630				RSA_01000	RSA_05040	RSA_06585	RSA_06580		RSA_04890	RSA_01845	RSA_01840	RSA_03100	RSA_05050	RSA_05045	RSA_03110		RSA_04975	RSA_04750	RSA_06845	RSA_02095
Rickettsia prowazekii Breinl	H375_5350		H375_2210	H375_3680	H375_3660	H375_1860		H375_500	H375_6980	H375_470		H375_3670	H375_1980		H375_8670				H375_4860	H375_190	H375_7540	H375_7550		H375_350	H375_3690	H375_3700	H375_1990	H375_170	H375_180	H375_1970		H375_250	H375_500	H375_7160	H375_3370
Rickettsia prowazekii BuV67-CWPP	MA1_00450		MA1_01885	MA1_01210	MA1_01220	MA1_02055		MA1_02715	MA1_03980	MA1_02720		MA1_01215	MA1_01995		MA1_03190				MA1_00685	MA1_02845	MA1_03720	MA1_03715		MA1_02775	MA1_01205	MA1_01200	MA1_01990	MA1_02855	MA1_02850	MA1_02000		MA1_02825	MA1_02705	MA1_03905	MA1_01350
Rickettsia prowazekii Chernikova	M9W_00450		M9W_01885	M9W_01215	M9W_01225	M9W_02055		M9W_02720	M9W_03990	M9W_02725		M9W_01220	M9W_01995		M9W_03195				M9W_00685	M9W_02850	M9W_03725	M9W_03720		M9W_02780	M9W_01210	M9W_01205	M9W_01990	M9W_02860	M9W_02855	M9W_02000		M9W_02830	M9W_02710	M9W_03910	M9W_01360
Rickettsia prowazekii Dachau	MA3_00460		MA3_01910	MA3_01225	MA3_01235	MA3_02080		MA3_02740	MA3_04025	MA3_02755		MA3_01230	MA3_02020		MA3_03235				MA3_00695	MA3_02885	MA3_03765	MA3_03760		MA3_02815	MA3_01220	MA3_01215	MA3_02015	MA3_02895	MA3_02890	MA3_02025		MA3_02865	MA3_02740	MA3_03950	MA3_01370
Rickettsia prowazekii GvV257	MA5_01820		MA5_03245	MA5_02575	MA5_02585	MA5_03415		MA5_04085	MA5_01070	MA5_04090		MA5_02580	MA5_03355		MA5_00265				MA5_02055	MA5_04215	MA5_00805	MA5_00800		MA5_04145	MA5_02570	MA5_02565	MA5_03350	MA5_04225	MA5_04220	MA5_03360		MA5_04195	MA5_04075	MA5_00995	MA5_02720
Rickettsia prowazekii Katsinyian	M9Y_00450		M9Y_01890	M9Y_01220	M9Y_01230	M9Y_02060		M9Y_02715	M9Y_03995	M9Y_02730		M9Y_01225	M9Y_02000		M9Y_03200				M9Y_00685	M9Y_02855	M9Y_03730	M9Y_03725		M9Y_02785	M9Y_01215	M9Y_01210	M9Y_01995	M9Y_02865	M9Y_02860	M9Y_02005		M9Y_02835	M9Y_02715	M9Y_03915	M9Y_01360
Rickettsia prowazekii Madrid E	RP095		RP389	RP249	RP251	RP423		RP567	RP823	RP568		RP250	RP411		RP666				RP143	RP595	RP768	RP767		RP579	RP248	RP247	RP410	RP597	RP596	RP412		RP590	RP565	RP807	RP280
Rickettsia prowazekii Naples-1	Ga0133281_11843		Ga0133281_11231	Ga0133281_1186	Ga0133281_1188	Ga0133281_11268		Ga0133281_11414	Ga0133281_11684	Ga0133281_11415		Ga0133281_1187	Ga0133281_11255		Ga0133281_11518				Ga0133281_11893	Ga0133281_11445	Ga0133281_11627	Ga0133281_11626		Ga0133281_11428	Ga0133281_1185	Ga0133281_1184	Ga0133281_11254	Ga0133281_11447	Ga0133281_11446	Ga0133281_11256		Ga0133281_11440	Ga0133281_11412	Ga0133281_11666	Ga0133281_11117
Rickettsia prowazekii NMRC Madrid E	H374_620		H374_6850	H374_8420	H374_8400			H374_4970	H374_2210	H374_4950		H374_8410	H374_6610		H374_3890				H374_130	H374_4650	H374_2780	H374_2790		H374_4820	H374_8430	H374_8440	H374_6620	H374_4630	H374_4640	H374_6590		H374_4710	H374_5000	H374_2380	H374_8090
Rickettsia prowazekii Rp22	rpr22_CDS089		rpr22_CDS379	rpr22_CDS243	rpr22_CDS245	rpr22_CDS413		rpr22_CDS543	rpr22_CDS803	rpr22_CDS546		rpr22_CDS244	rpr22_CDS401		rpr22_CDS643				rpr22_CDS136	rpr22_CDS571	rpr22_CDS751	rpr22_CDS750		rpr22_CDS557	rpr22_CDS242	rpr22_CDS241	rpr22_CDS400	rpr22_CDS573	rpr22_CDS572	rpr22_CDS402		rpr22_CDS567	rpr22_CDS543	rpr22_CDS788	rpr22_CDS274
Rickettsia prowazekii RpGvF24	MA7_00455		MA7_01880	MA7_01210	MA7_01220	MA7_02050		MA7_02705	MA7_03980	MA7_02720		MA7_01215	MA7_01990		MA7_03190				MA7_00690	MA7_02845	MA7_03720	MA7_03715		MA7_02775	MA7_01205	MA7_01200	MA7_01985	MA7_02855	MA7_02850	MA7_01995		MA7_02825	MA7_02705	MA7_03905	MA7_01355
Rickettsia rhipicephali 3-7-female6-CWPP	MCC_01255	MCC_00260	MCC_03575	MCC_02455	MCC_02465	MCC_03855		MCC_05385	MCC_07585	MCC_05400		MCC_02460	MCC_03710		MCC_06230				MCC_01570	MCC_05655	MCC_07175	MCC_07180		MCC_05505	MCC_02450	MCC_02445	MCC_03705	MCC_05665	MCC_05660	MCC_03715		MCC_05580	MCC_05385	MCC_07405	MCC_02720
Rickettsia rhipicephali HJ#5	Ga0123749_111456	Ga0123749_111254	Ga0123749_11304	Ga0123749_1182	Ga0123749_1184	Ga0123749_11353		Ga0123749_11734	Ga0123749_111195	Ga0123749_11737		Ga0123749_1183	Ga0123749_11329		Ga0123749_11913				Ga0123749_111525	Ga0123749_11796	Ga0123749_111107	Ga0123749_111108		Ga0123749_11764	Ga0123749_1181	Ga0123749_1180	Ga0123749_11328	Ga0123749_11798	Ga0123749_11797	Ga0123749_11330		Ga0123749_11781	Ga0123749_11734	Ga0123749_111157	Ga0123749_11132
Rickettsia rickettsii Arizona	RPO_00740	RPO_07505	RPO_03035	RPO_01890	RPO_01900	RPO_03315		RPO_04810	RPO_07050	RPO_04815		RPO_01895	RPO_03155		RPO_05665				RPO_01055	RPO_05080	RPO_06600	RPO_06595		RPO_04935	RPO_01885	RPO_01880	RPO_03150	RPO_05090	RPO_05085	RPO_03160		RPO_05020	RPO_04795	RPO_06865	RPO_02145
Rickettsia rickettsii Brazil	RPN_06160	RPN_06950	RPN_03885	RPN_05015	RPN_05005	RPN_03605		RPN_02245	RPN_07400	RPN_02240		RPN_05010	RPN_03765		RPN_01380				RPN_05850	RPN_01970	RPN_00450	RPN_00455		RPN_02120	RPN_05020	RPN_05025	RPN_03770	RPN_01960	RPN_01965	RPN_03760		RPN_02030	RPN_02255	RPN_00190	RPN_04765
Rickettsia rickettsii Colombia	RPL_00735	RPL_07500	RPL_03015	RPL_01880	RPL_01890	RPL_03305		RPL_04800	RPL_07050	RPL_04805		RPL_01885	RPL_03135		RPL_05645				RPL_01040	RPL_05075	RPL_06585	RPL_06580		RPL_04930	RPL_01875	RPL_01870	RPL_03130	RPL_05085	RPL_05080	RPL_03140		RPL_05015	RPL_04785	RPL_06850	RPL_02135
Rickettsia rickettsii Hauke	RPM_00740	RPM_07480	RPM_03015	RPM_01875	RPM_01885	RPM_03290		RPM_04765	RPM_07020	RPM_04785		RPM_01880	RPM_03135		RPM_05635				RPM_01050	RPM_05050	RPM_06570	RPM_06565		RPM_04905	RPM_01870	RPM_01865	RPM_03130	RPM_05060	RPM_05055	RPM_03140		RPM_04990	RPM_04765	RPM_06830	RPM_02125
Rickettsia rickettsii Hino	RPJ_00730	RPJ_07470	RPJ_03010	RPJ_01875	RPJ_01885	RPJ_03285		RPJ_04760	RPJ_07010	RPJ_04765		RPJ_01880	RPJ_03130		RPJ_05610				RPJ_01040	RPJ_05030	RPJ_06545	RPJ_06540		RPJ_04885	RPJ_01870	RPJ_01865	RPJ_03125	RPJ_05040	RPJ_05035	RPJ_03135		RPJ_04970	RPJ_04750	RPJ_06810	RPJ_02125
Rickettsia rickettsii Hlp#2	RPK_00705	RPK_07445	RPK_03455	RPK_01865	RPK_01875	RPK_03185		RPK_04700	RPK_06980	RPK_04715		RPK_01870	RPK_03335		RPK_05590				RPK_01015	RPK_04985	RPK_06520	RPK_06515		RPK_04840	RPK_01860	RPK_01855	RPK_03340	RPK_04995	RPK_04990	RPK_03330		RPK_04920	RPK_04700	RPK_06785	RPK_04320
Rickettsia rickettsii Iowa	RrIowa_0162	RrIowa_1588	RrIowa_0641	RrIowa_0403	RrIowa_0405	RrIowa_0703		RrIowa_1017	RrIowa_1496	RrIowa_1019		RrIowa_0404	RrIowa_0667		RrIowa_1207				RrIowa_0227	RrIowa_1081	RrIowa_1402	RrIowa_1401		RrIowa_1050	RrIowa_0402	RrIowa_0401	RrIowa_0666	RrIowa_1084	RrIowa_1082	RrIowa_0668		RrIowa_1068	RrIowa_1014	RrIowa_1455	RrIowa_0455
Rickettsia rickettsii Iowa Large Clone	Ga0175611_111370	Ga0175611_111211	Ga0175611_11343	Ga0175611_11123	Ga0175611_11125	Ga0175611_11398		Ga0175611_11684	Ga0175611_111123	Ga0175611_11685		Ga0175611_11124	Ga0175611_11368		Ga0175611_11855				Ga0175611_111431	Ga0175611_11744	Ga0175611_111037	Ga0175611_111036		Ga0175611_11714	Ga0175611_11122	Ga0175611_11121	Ga0175611_11367	Ga0175611_11746	Ga0175611_11745	Ga0175611_11369		Ga0175611_11732	Ga0175611_11682	Ga0175611_111088	Ga0175611_11170
Rickettsia rickettsii Iowa Small Clone	Ga0175280_111369	Ga0175280_111209	Ga0175280_11342	Ga0175280_11122	Ga0175280_11124	Ga0175280_11397		Ga0175280_11683	Ga0175280_111121	Ga0175280_11684		Ga0175280_11123	Ga0175280_11367		Ga0175280_11854				Ga0175280_111430	Ga0175280_11743	Ga0175280_111036	Ga0175280_111035		Ga0175280_11713	Ga0175280_11121	Ga0175280_11120	Ga0175280_11366	Ga0175280_11745	Ga0175280_11744	Ga0175280_11368		Ga0175280_11731	Ga0175280_11681	Ga0175280_111087	Ga0175280_11169
Rickettsia rickettsii Morgan	Ga0069298_111372	Ga0069298_111211	Ga0069298_11344	Ga0069298_11123	Ga0069298_11125	Ga0069298_11399		Ga0069298_11686	Ga0069298_111123	Ga0069298_11687		Ga0069298_11124	Ga0069298_11369		Ga0069298_11857				Ga0069298_111433	Ga0069298_11746	Ga0069298_111038	Ga0069298_111037		Ga0069298_11716	Ga0069298_11122	Ga0069298_11121	Ga0069298_11368	Ga0069298_11748	Ga0069298_11747	Ga0069298_11370		Ga0069298_11734	Ga0069298_11684	Ga0069298_111089	Ga0069298_11170
Rickettsia rickettsii R	Ga0069297_111360	Ga0069297_111202	Ga0069297_11351	Ga0069297_11130	Ga0069297_11132	Ga0069297_11407		Ga0069297_11677	Ga0069297_111114	Ga0069297_11678		Ga0069297_11131	Ga0069297_11377		Ga0069297_11846				Ga0069297_111421	Ga0069297_11737	Ga0069297_111027	Ga0069297_111026		Ga0069297_11707	Ga0069297_11129	Ga0069297_11128	Ga0069297_11376	Ga0069297_11739	Ga0069297_11738	Ga0069297_11378		Ga0069297_11725	Ga0069297_11675	Ga0069297_111078	Ga0069297_11177
Rickettsia rickettsii Sheila Smith	A1G_00750	A1G_07455	A1G_03040	A1G_01910	A1G_01920	A1G_03315		A1G_04745	A1G_07010	A1G_04750		A1G_01915	A1G_03165		A1G_05600				A1G_01055	A1G_05025	A1G_06550	A1G_06545		A1G_04875	A1G_01905	A1G_01900	A1G_03160	A1G_05035	A1G_05030	A1G_03170		A1G_04960	A1G_04730	A1G_06815	A1G_02160
Rickettsia slovaca 13-B	Rsl_156	Rsl_1550	Rsl_629	Rsl_395	Rsl_397	Rsl_686		Rsl_985	Rsl_1456	Rsl_987		Rsl_396	Rsl_653		Rsl_1171				Rsl_220	Rsl_1047	Rsl_1367	Rsl_1366		Rsl_1021	Rsl_394	Rsl_393	Rsl_652	Rsl_1049	Rsl_1048	Rsl_654		Rsl_1035	Rsl_982	Rsl_1421	Rsl_445
Rickettsia slovaca D-CWPP	MC3_00750	MC3_07550	MC3_03055	MC3_01920	MC3_01930	MC3_03325		MC3_04785	MC3_07080	MC3_04790		MC3_01925	MC3_03170		MC3_05655				MC3_01065	MC3_05070	MC3_06645	MC3_06640		MC3_04945	MC3_01915	MC3_01910	MC3_03165	MC3_05080	MC3_05075	MC3_03175		MC3_05015	MC3_04770	MC3_06900	MC3_02170
Rickettsia typhi B9991CWPP	RTB9991CWPP_00195		RTB9991CWPP_01850	RTB9991CWPP_01175	RTB9991CWPP_01185	RTB9991CWPP_02025		RTB9991CWPP_02680	RTB9991CWPP_03895	RTB9991CWPP_02685		RTB9991CWPP_01180	RTB9991CWPP_01965		RTB9991CWPP_03170				RTB9991CWPP_00650	RTB9991CWPP_02810	RTB9991CWPP_03635	RTB9991CWPP_03630		RTB9991CWPP_02740	RTB9991CWPP_01170	RTB9991CWPP_01165	RTB9991CWPP_01960	RTB9991CWPP_02820	RTB9991CWPP_02815	RTB9991CWPP_01970		RTB9991CWPP_02790	RTB9991CWPP_02670	RTB9991CWPP_03820	RTB9991CWPP_01320
Rickettsia typhi TH1527	RTTH1527_00195		RTTH1527_01840	RTTH1527_01170	RTTH1527_01180	RTTH1527_02015		RTTH1527_02670	RTTH1527_03895	RTTH1527_02685		RTTH1527_01175	RTTH1527_01955		RTTH1527_03165				RTTH1527_00645	RTTH1527_02810	RTTH1527_03635	RTTH1527_03630		RTTH1527_02740	RTTH1527_01165	RTTH1527_01160	RTTH1527_01950	RTTH1527_02820	RTTH1527_02815	RTTH1527_01960		RTTH1527_02790	RTTH1527_02670	RTTH1527_03820	RTTH1527_01315
Rickettsia typhi TM2540	Ga0346706_45		Ga0346706_401	Ga0346706_253	Ga0346706_255	Ga0346706_438		Ga0346706_583	Ga0346706_851	Ga0346706_586		Ga0346706_254	Ga0346706_424		Ga0346706_694				Ga0346706_141	Ga0346706_615	Ga0346706_796	Ga0346706_795		Ga0346706_599	Ga0346706_252	Ga0346706_251	Ga0346706_423	Ga0346706_617	Ga0346706_616	Ga0346706_425		Ga0346706_611	Ga0346706_583	Ga0346706_835	Ga0346706_285
Rickettsia typhi Wilmington	RT0042		RT0377	RT0241	RT0243	RT0409		RT0555	RT0811	RT0556		RT0242	RT0397		RT0658				RT0132	RT0583	RT0755	RT0754		RT0568	RT0240	RT0239	RT0396	RT0585	RT0584	RT0398		RT0579	RT0553	RT0794	RT0271
Orientia tsutsugamushi Boryong		OTBS_0048		OTBS_0598	OTBS_1109	OTBS_0266		OTBS_0700	OTBS_0779	OTBS_0701		OTBS_0597	OTBS_1529		OTBS_1614				OTBS_1136	OTBS_0697	OTBS_1345	OTBS_1344		OTBS_1615	OTBS_0599	OTBS_0600	OTBS_1528	OTBS_0699	OTBS_0698	OTBS_1530		OTBS_0303	OTBS_2173		OTBS_2171
Orientia tsutsugamushi Gilliam		Ga0346768_01_205822_206907		Ga0346768_01_2041624_2042598	Ga0346768_01_1475594_1476841	Ga0346768_01_514761_515060, Ga0346768_01_1642328_1642627		Ga0346768_01_2457175_2458833	Ga0346768_01_1157069_1159333	Ga0346768_01_2428293_2428586		Ga0346768_01_2042609_2043421	Ga0346768_01_1737633_1738655		Ga0346768_01_1302886_1304247				Ga0346768_01_1652168_1653019	Ga0346768_01_2422399_2423490	Ga0346768_01_1958463_1959530	Ga0346768_01_1959537_1960388		Ga0346768_01_1304451_1305716	Ga0346768_01_2040735_2041646	Ga0346768_01_2039258_2040766	Ga0346768_01_1738767_1740146	Ga0346768_01_2424886_2426355	Ga0346768_01_2423480_2424841	Ga0346768_01_1736550_1737629		Ga0346768_01_2195229_2196299	Ga0346768_01_2457175_2458833		Ga0346768_01_2455573_2456604
Orientia tsutsugamushi Karp		Ga0346633_433		Ga0346633_2135	Ga0346633_1175	Ga0346633_525		Ga0346633_2766	Ga0346633_1351	Ga0346633_47		Ga0346633_2136	Ga0346633_1433		Ga0346633_2356				Ga0346633_1630	Ga0346633_43	Ga0346633_1933	Ga0346633_1932		Ga0346633_2357	Ga0346633_2134	Ga0346633_2133	Ga0346633_1432	Ga0346633_45	Ga0346633_44	Ga0346633_1434		Ga0346633_895	Ga0346633_2766		Ga0346633_2764
Orientia tsutsugamushi Kato		Ga0346564_113		Ga0346564_966	Ga0346564_1856	Ga0346564_494		Ga0346564_770	Ga0346564_1658	Ga0346564_771		Ga0346564_965	Ga0346564_1535		Ga0346564_1023				Ga0346564_1882	Ga0346564_767	Ga0346564_1310	Ga0346564_1309		Ga0346564_1022	Ga0346564_967	Ga0346564_968	Ga0346564_1536	Ga0346564_769	Ga0346564_768	Ga0346564_1534		Ga0346564_2435	Ga0346564_2604		Ga0346564_2602
Orientia tsutsugamushi sv. Gilliam Ikeda		OTT_1510		OTT_0949	OTT_0577	OTT_1389		OTT_1875	OTT_0381	OTT_1876		OTT_0950	OTT_0674		OTT_0905				OTT_0600	OTT_1872	OTT_0296	OTT_0297		OTT_0906	OTT_0948	OTT_0947	OTT_0673	OTT_1874	OTT_1873	OTT_0675		OTT_1109	OTT_1578		OTT_1580
Orientia tsutsugamushi TA686		Ga0346566_1471		Ga0346566_2498	Ga0346566_871	Ga0346566_1863		Ga0346566_1236	Ga0346566_625	Ga0346566_1235		Ga0346566_2497	Ga0346566_1272		Ga0346566_945				Ga0346566_257	Ga0346566_1239	Ga0346566_1250	Ga0346566_1251		Ga0346566_944	Ga0346566_2499	Ga0346566_2500	Ga0346566_1271	Ga0346566_1237	Ga0346566_1238	Ga0346566_1273		Ga0346566_233	Ga0346566_2108		Ga0346566_2110
Orientia tsutsugamushi UT176		Ga0346723_43		Ga0346723_1007	Ga0346723_1640	Ga0346723_288		Ga0346723_2248	Ga0346723_1754	Ga0346723_614		Ga0346723_1006	Ga0346723_1846		Ga0346723_1418				Ga0346723_1377	Ga0346723_618	Ga0346723_1959	Ga0346723_1960		Ga0346723_1417	Ga0346723_1008	Ga0346723_1009	Ga0346723_1847	Ga0346723_616	Ga0346723_617	Ga0346723_1845		Ga0346723_2118	Ga0346723_2248		Ga0346723_2246
Orientia tsutsugamushi UT76		Ga0346707_75		Ga0346707_2004	Ga0346707_827	Ga0346707_469		Ga0346707_2448	Ga0346707_1793	Ga0346707_1067		Ga0346707_2005	Ga0346707_1489		Ga0346707_1664				Ga0346707_1692	Ga0346707_1063	Ga0346707_1380	Ga0346707_1379		Ga0346707_1663	Ga0346707_2003	Ga0346707_2002	Ga0346707_1488	Ga0346707_1065	Ga0346707_1064	Ga0346707_1490		Ga0346707_731	Ga0346707_2448		Ga0346707_2446
Wolbachia endosymbiont Cameroon of Onchocerca volvulus			Ga0054525_00277	Ga0054525_00604	Ga0054525_00685				Ga0054525_00440			Ga0054525_00603			Ga0054525_00324					Ga0054525_00439	Ga0054525_00299			Ga0054525_00482	Ga0054525_00229	Ga0054525_00408	Ga0054525_00609	Ga0054525_00060	Ga0054525_00139	Ga0054525_00009			Ga0054525_00486		Ga0054525_00666
Wolbachia endosymbiont of Brugia pahangi FR3			Ga0443142_01_561715_562827	Ga0443142_01_117100_118077	Ga0443142_01_941904_943142				Ga0443142_01_753283_755406			Ga0443142_01_116341_117099			Ga0443142_01_702254_703444					Ga0443142_01_752227_753048	Ga0443142_01_664592_665668			Ga0443142_01_883739_885016	Ga0443142_01_1032248_1033084	Ga0443142_01_947498_949150	Ga0443142_01_202361_203917	Ga0443142_01_223561_225051	Ga0443142_01_633207_634574	Ga0443142_01_132997_134028		Ga0443142_01_954101_955303	Ga0443142_01_981678_983243		Ga0443142_01_20469_21590
Wolbachia endosymbiont of Carposina sasakii wCauA			Ga0443236_01_505025_505957	Ga0443236_01_507645_508592	Ga0443236_01_423840_425078	Ga0443236_01_837524_837838		Ga0443236_01_238033_239868	Ga0443236_01_391446_393560	Ga0443236_01_419780_420091		Ga0443236_01_506906_507628	Ga0443236_01_892621_893736		Ga0443236_01_983584_984780					Ga0443236_01_120949_121929	Ga0443236_01_227650_228726			Ga0443236_01_165669_166946	Ga0443236_01_1130173_1131060	Ga0443236_01_1239773_1241233	Ga0443236_01_1305898_1307451	Ga0443236_01_1366451_1367896	Ga0443236_01_99844_101373	Ga0443236_01_802198_803229		Ga0443236_01_16022_17509	Ga0443236_01_1054692_1056266		Ga0443236_01_115914_117017
Wolbachia endosymbiont of Chrysomya megacephala wMeg			Ga0443255_01_1047133_1048239	Ga0443255_01_1025522_1026469	Ga0443255_01_486182_487420				Ga0443255_01_1158375_1160441			Ga0443255_01_1024783_1025541			Ga0443255_01_66021_67205					Ga0443255_01_536404_537384	Ga0443255_01_320261_321328			Ga0443255_01_267424_268701	Ga0443255_01_1240479_1241363	Ga0443255_01_848626_849624, Ga0443255_01_1191183_1192133	Ga0443255_01_1373616_1374971, Ga0443255_01_18760_20115	Ga0443255_01_887098_888654	Ga0443255_01_551291_552667	Ga0443255_01_514335_515393		Ga0443255_01_148133_149317	Ga0443255_01_61294_62850		Ga0443255_01_367009_368112
Wolbachia endosymbiont of Cimex lectularius wCle			Ga0309721_11373	Ga0309721_11128	Ga0309721_11287	Ga0309721_111243		Ga0309721_111158	Ga0309721_11747	Ga0309721_11777		Ga0309721_11129	Ga0309721_11815		Ga0309721_1160					Ga0309721_11573	Ga0309721_111379			Ga0309721_11727	Ga0309721_11227	Ga0309721_111280	Ga0309721_11669	Ga0309721_11359	Ga0309721_11623	Ga0309721_111303		Ga0309721_11184	Ga0309721_111376		Ga0309721_111021
Wolbachia endosymbiont of Cruorifilaria tuberocauda 55YT			Ga0482298_01_485991_487103	Ga0482298_01_774164_775093					Ga0482298_01_198056_200179			Ga0482298_01_773663_774142								Ga0482298_01_197002_197982	Ga0482298_01_39319_40395			Ga0482298_01_246486_247775	Ga0482298_01_445125_446003	Ga0482298_01_166599_168050	Ga0482298_01_34503_35849	Ga0482298_01_559615_561012	Ga0482298_01_678497_679990	Ga0482298_01_606152_607177			Ga0482298_01_250859_252430		Ga0482298_01_831675_832784
Wolbachia endosymbiont of Ctenocephalides felis wCfeJ			Ga0439527_01_965154_966086	Ga0439527_01_889337_890353	Ga0439527_01_32581_33819	Ga0439527_01_219194_219511		Ga0439527_01_168747_170537	Ga0439527_01_408255_410378	Ga0439527_01_254250_254555		Ga0439527_01_888598_889356	Ga0439527_01_1085991_1086851		Ga0439527_01_58509_59705					Ga0439527_01_410441_411421	Ga0439527_01_482515_483591			Ga0439527_01_352215_353492	Ga0439527_01_1198850_1199737	Ga0439527_01_630542_632200	Ga0439527_01_95201_96760	Ga0439527_01_10107_11501	Ga0439527_01_600119_601549	Ga0439527_01_877011_878051		Ga0439527_01_430927_432408	Ga0439527_01_326878_328452		Ga0439527_01_428407_429522
Wolbachia endosymbiont of Ctenocephalides felis wCfeT			Ga0439677_01_923321_924427	Ga0439677_01_79460_80431	Ga0439677_01_359701_360939	Ga0439677_01_1138175_1138372		Ga0439677_01_561912_563003	Ga0439677_01_1251246_1253318	Ga0439677_01_328834_329100		Ga0439677_01_78721_79479	Ga0439677_01_308435_309541		Ga0439677_01_98752_99945					Ga0439677_01_93345_94310	Ga0439677_01_612488_613564			Ga0439677_01_1120111_1121379	Ga0439677_01_406041_406928	Ga0439677_01_253507_255150	Ga0439677_01_1178351_1179805	Ga0439677_01_509181_510689	Ga0439677_01_921944_923329	Ga0439677_01_1064873_1066087		Ga0439677_01_166139_167746	Ga0439677_01_468961_470523		Ga0439677_01_191878_192927
Wolbachia endosymbiont of Culex quinquefasciatus Pel			WP1357	WP0403	WP0924				WP0199			WP0404			WP0577					WP0869	WP0799			WP0760	WP0473	WP0207	WP0533	WP0137	WP0848	WP0898		WP0645	WP0573		WP1016
Wolbachia endosymbiont of Dipetalonema caudispina 362YU			Ga0482299_01_552455_553573	Ga0482299_01_235783_236691					Ga0482299_01_59805_61934											Ga0482299_01_58765_59745	Ga0482299_01_768879_769955			Ga0482299_01_93539_94819	Ga0482299_01_399704_400591	Ga0482299_01_851013_852332	Ga0482299_01_763601_764959	Ga0482299_01_526891_528288	Ga0482299_01_301910_303400	Ga0482299_01_479856_480893			Ga0482299_01_88856_90439		Ga0482299_01_694692_695786
Wolbachia endosymbiont of Dirofilaria (Dirofilaria) immitis FR3			Ga0479919_01_422569_423681	Ga0479919_01_689759_690763	Ga0479919_01_219842_221089				Ga0479919_01_873512_875587			Ga0479919_01_690775_691494			Ga0479919_01_92508_93224					Ga0479919_01_875657_876637	Ga0479919_01_121693_122769			Ga0479919_01_823139_824416	Ga0479919_01_366578_367465	Ga0479919_01_906105_907562	Ga0479919_01_126651_127994	Ga0479919_01_488014_489420	Ga0479919_01_618326_619744	Ga0479919_01_539632_540669		Ga0479919_01_726140_727627	Ga0479919_01_818470_820044		Ga0479919_01_197591_198709
Wolbachia endosymbiont of Drosophila incompta wInc_Cu			Ga0175827_11100	Ga0175827_1197	Ga0175827_11164	Ga0175827_11355		Ga0175827_111336	Ga0175827_11119	Ga0175827_11169		Ga0175827_1198	Ga0175827_11417		Ga0175827_11764					Ga0175827_111166	Ga0175827_111325			Ga0175827_111266	Ga0175827_11578		Ga0175827_11896	Ga0175827_11978	Ga0175827_111193	Ga0175827_11333		Ga0175827_111078	Ga0175827_11758		Ga0175827_111172
Wolbachia endosymbiont of Drosophila mauritiana wMau			Ga0443285_01_638963_640069	Ga0443285_01_626373_627326	Ga0443285_01_16218_17456				Ga0443285_01_511459_513522			Ga0443285_01_625634_626392			Ga0443285_01_1045852_1047045					Ga0443285_01_146016_146996	Ga0443285_01_1232903_1233970			Ga0443285_01_88925_90211	Ga0443285_01_874952_875851	Ga0443285_01_717434_718456, Ga0443285_01_505175_506173	Ga0443285_01_970184_971716	Ga0443285_01_831559_833121	Ga0443285_01_173248_174624	Ga0443285_01_123791_124813		Ga0443285_01_1126700_1127884	Ga0443285_01_1041070_1042500		Ga0443285_01_4927_6030
Wolbachia endosymbiont of Drosophila melanogaster			WD0098	WD0095	WD0166	WD0343		WD1273	WD0120	WD0171		WD0096	WD0394		WD0723					WD1102	WD1258			WD1197	WD0541	WD0495	WD0849	WD0924	WD1128	WD0323		WD1010	WD0719		WD1108
Wolbachia endosymbiont of Drosophila simulans wAu			Ga0258250_11135	Ga0258250_11139	Ga0258250_1172	Ga0258250_11385		Ga0258250_111291	Ga0258250_11117	Ga0258250_1168		Ga0258250_11138	Ga0258250_11441		Ga0258250_11742					Ga0258250_11897	Ga0258250_111280			Ga0258250_111220	Ga0258250_11571	Ga0258250_11536	Ga0258250_11858	Ga0258250_111082	Ga0258250_11926	Ga0258250_11354		Ga0258250_111142	Ga0258250_11738		Ga0258250_11903
Wolbachia endosymbiont of Drosophila simulans wHa			wHa_01310	wHa_01330	wHa_00800	wHa_04980		wHa_10600	wHa_01120	wHa_00850		wHa_01320	wHa_04570		wHa_06140					wHa_09210	wHa_10500			wHa_09990	wHa_04310	wHa_02850	wHa_07310	wHa_07770	wHa_09460	wHa_05250		wHa_08440	wHa_06100		wHa_09270
Wolbachia endosymbiont of Drosophila simulans wNo			wNo_10510	wNo_10410	wNo_06020				wNo_09610			wNo_10400			wNo_02790					wNo_05460	wNo_04590			wNo_04210	wNo_01440	wNo_00620, wNo_09540	wNo_02210	wNo_09370	wNo_07490	wNo_05240		wNo_03410	wNo_02750		wNo_05050
Wolbachia endosymbiont of Folsomia candida Berlin			Ga0335609_761	Ga0335609_207	Ga0335609_917	Ga0335609_982		Ga0335609_758	Ga0335609_788	Ga0335609_931		Ga0335609_206	Ga0335609_1652		Ga0335609_1315					Ga0335609_1383	Ga0335609_10			Ga0335609_44	Ga0335609_1679	Ga0335609_1288	Ga0335609_1280	Ga0335609_1544	Ga0335609_1493	Ga0335609_184		Ga0335609_1561	Ga0335609_233		Ga0335609_1471
Wolbachia endosymbiont of Litomosoides sigmodontis wLsig			Ga0486352_01_484227_485339	Ga0486352_01_205316_206293	Ga0486352_01_674493_675731				Ga0486352_01_647810_649927			Ga0486352_01_204550_205311			Ga0486352_01_963857_965044					Ga0486352_01_646754_647734	Ga0486352_01_1015679_1016758			Ga0486352_01_767601_768878	Ga0486352_01_520014_520901	Ga0486352_01_739557_741227	Ga0486352_01_1038000_1039499	Ga0486352_01_510971_512458	Ga0486352_01_25518_26879	Ga0486352_01_224292_225323		Ga0486352_01_723049_724542	Ga0486352_01_100013_101578		Ga0486352_01_579474_580556
Wolbachia endosymbiont TRS of Brugia malayi			Wbm0290	Wbm0570	Wbm0113			Wbm5008	Wbm0644			Wbm0571	Wbm5031		Wbm0602					Wbm0643	Wbm0154			Wbm0740	Wbm0778	Wbm0118	Wbm0508	Wbm0492	Wbm0238	Wbm0557		Wbm0122	Wbm0075		Wbm0015
Wolbachia endosymbiont wPip_Mol of Culex molestus			WPM_000992	WPM_001099c	WPM_000927				WPM_000314			WPM_001098c			WPM_000596					WPM_000883	WPM_000818			WPM_000778	WPM_000504c	WPM_000407c, WPM_000309	WPM_000559	WPM_000364	WPM_000864c	WPM_000906		WPM_000668	WPM_000592c		WPM_000039c
Wolbachia pipientis wAlbB			Ga0397727_1402	Ga0397727_1386	Ga0397727_479				Ga0397727_910			Ga0397727_1385			Ga0397727_355					Ga0397727_1483	Ga0397727_523			Ga0397727_148	Ga0397727_1371	Ga0397727_777, Ga0397727_921	Ga0397727_450	Ga0397727_671	Ga0397727_84	Ga0397727_504		Ga0397727_320	Ga0397727_361		Ga0397727_1517
Wolbachia pipientis wAu			Ga0061059_11135	Ga0061059_11138	Ga0061059_1172	Ga0061059_11381		Ga0061059_111275	Ga0061059_11117	Ga0061059_1168		Ga0061059_11137	Ga0061059_11437		Ga0061059_11736					Ga0061059_11889	Ga0061059_111264			Ga0061059_111204	Ga0061059_11565	Ga0061059_11530	Ga0061059_11851	Ga0061059_111068	Ga0061059_11917	Ga0061059_11351		Ga0061059_111127	Ga0061059_11732		Ga0061059_11895
Wolbachia sp. wOo			wOo_06020	wOo_01490	wOo_00380				wOo_03790			wOo_01500			wOo_05350					wOo_03800	wOo_05740			wOo_03240	wOo_06610	wOo_04220	wOo_01420	wOo_08850	wOo_07780	wOo_09500			wOo_03200		wOo_00640
Wolbachia sp. wRi			WRi_001530	WRi_001550	WRi_000880	WRi_004450		WRi_012430	WRi_001290	WRi_000840		WRi_001540	WRi_003950		WRi_007520					WRi_012770	WRi_012320			WRi_011710	WRi_003550	WRi_002500	WRi_008130	WRi_008770	WRi_013010	WRi_004740		WRi_009620	WRi_006600		WRi_012830
Anaplasma marginale Florida			AMF_824	AMF_151	AMF_844	AMF_444		AMF_307	AMF_240	AMF_451		AMF_152	AMF_972		AMF_952					AMF_908	AMF_388	AMF_387		AMF_106	AMF_524	AMF_010	AMF_177	AMF_208	AMF_599	AMF_344		AMF_929	AMF_902		AMF_005
Anaplasma marginale Jaboticabal			Ga0365093_862	Ga0365093_165	Ga0365093_881	Ga0365093_474		Ga0365093_328	Ga0365093_258	Ga0365093_483		Ga0365093_166	Ga0365093_1007		Ga0365093_988					Ga0365093_943	Ga0365093_412	Ga0365093_411		Ga0365093_120	Ga0365093_556	Ga0365093_11	Ga0365093_192	Ga0365093_224	Ga0365093_634	Ga0365093_369		Ga0365093_963	Ga0365093_936		Ga0365093_4
Anaplasma marginale Palmeira			Ga0365190_01_983168_984223	Ga0365190_01_169767_170771	Ga0365190_01_1004576_1005814	Ga0365190_01_538072_538431		Ga0365190_01_374394_375887	Ga0365190_01_269679_271919	Ga0365190_01_542732_542989		Ga0365190_01_170830_171537	Ga0365190_01_1132953_1134095		Ga0365190_01_1116757_1117995					Ga0365190_01_1072923_1073903	Ga0365190_01_470510_471619	Ga0365190_01_469537_470403		Ga0365190_01_121052_122338	Ga0365190_01_635852_636751	Ga0365190_01_6942_8366	Ga0365190_01_198988_200352	Ga0365190_01_234845_236305	Ga0365190_01_728887_730260	Ga0365190_01_421935_423005		Ga0365190_01_1094480_1095946	Ga0365190_01_1065255_1066943		Ga0365190_01_3113_4183
Anaplasma marginale St. Maries			AM1091	AM205	AM1115	AM594		AM418	AM322			AM206	AM1287		AM1261					AM1207	AM522	AM521		AM145	AM701		AM243	AM282	AM807	AM471		AM1229	AM1196		AM005
Anaplasma phagocytophilum Dog2			YYY_05675		YYY_05535, YYY_5445				YYY_04400			YYY_00945			YYY_06050						YYY_03610	YYY_02930			YYY_03500							YYY_06455
Anaplasma phagocytophilum HZ			APH_1214		APH_1164, APH_1183				APH_0955			APH_0195			APH_1292						APH_0770	APH_0614			APH_0745							APH_1377
Anaplasma phagocytophilum HZ2			YYU_05605		YYU_05375,YYU_05465				YYU_04370			YYU_00940			YYU_05975						YYU_03615	YYU_02925			YYU_03505							YYU_06380
Anaplasma phagocytophilum JM			WSQ_05660		WSQ_05520, WSQ_05430				WSQ_04405			WSQ_00930			WSQ_06045						WSQ_03615	WSQ_02920			WSQ_03505							WSQ_06440
Anaplasma phagocytophilum Norway variant2			Ga0213593_1179		Ga0213593_1125, Ga0213593_1145				Ga0213593_904			Ga0213593_196			Ga0213593_1220						Ga0213593_751	Ga0213593_617			Ga0213593_731							Ga0213593_1354
Ehrlichia canis Jake			Ecaj_0859		Ecaj_0876				Ecaj_0212			Ecaj_0669			Ecaj_0925
Ehrlichia canis YZ-1			Ga0263995_11827		Ga0263995_11810				Ga0263995_11971			Ga0263995_11431			Ga0263995_11758
Ehrlichia chaffeensis Arkansas			ECH_1067		ECH_1090				ECH_0890			ECH_0337			ECH_1153
Ehrlichia chaffeensis Heartland			ECHHL_0107		ECHHL_0087				ECHHL_0786			ECHHL_0287			ECHHL_0035
Ehrlichia chaffeensis Jax			ECHJAX_0106		ECHJAX_0087				ECHJAX_0262			ECHJAX_0771			ECHJAX_0035
Ehrlichia chaffeensis Liberty			ECHLIB_0107		ECHLIB_0087				ECHLIB_0258			ECHLIB_0775			ECHLIB_0035
Ehrlichia chaffeensis Osceola			ECHOSC_0110		ECHOSC_0089				ECHOSC_0798			ECHOSC_0295			ECHOSC_0035
Ehrlichia chaffeensis Saint Vincent			ECHSTV_0107		ECHSTV_0086				ECHSTV_0255			ECHSTV_0759			ECHSTV_0035
Ehrlichia chaffeensis Wakulla			ECHWAK_0105		ECHWAK_0084				ECHWAK_0258			ECHWAK_0768			ECHWAK_0033
Ehrlichia chaffeensis West Paces			ECHWP_0105		ECHWP_0085				ECHWP_0782			ECHWP_0283			ECHWP_0035
Ehrlichia muris AS145			EMUR_04355		EMUR_04445				EMUR_01060			EMUR_03505			EMUR_04680
Ehrlichia ruminantium Gardel			ERGA_CDS_08610		ERGA_CDS_08820				ERGA_CDS_02060			ERGA_CDS_06850			ERGA_CDS_09220
Ehrlichia ruminantium Omatjenne			Ga0593002_01_1362489_1362680		Ga0593002_01_1376815_1378050				Ga0593002_01_350037_352607			Ga0593002_01_1066126_1066953			Ga0593002_01_1436121_1437389
Ehrlichia ruminantium Welgevonden, ARC-OVI			Erum8220		Erum8400				Erum2090			Erum6620			Erum8800
Ehrlichia sp. HF			EHF_0113		EHF_0090				EHF_0776			EHF_0292			EHF_0034
Chlamydia abortus 1B_cevac		Ga0175507_111044	Ga0175507_11316	Ga0175507_11549		Ga0175507_111012		Ga0175507_111047	Ga0175507_11519	Ga0175507_111048		Ga0175507_11552	Ga0175507_11547							Ga0175507_11544	Ga0175507_11489	Ga0175507_11384		Ga0175507_11205	Ga0175507_11639	Ga0175507_11549	Ga0175507_11545	Ga0175507_111045	Ga0175507_11543	Ga0175507_11548		Ga0175507_11377	Ga0175507_11337		Ga0175507_11506	Ga0175507_1172
Chlamydia abortus 1H		Ga0175341_111044	Ga0175341_11316	Ga0175341_11549		Ga0175341_111012		Ga0175341_111047	Ga0175341_11519	Ga0175341_111048		Ga0175341_11552	Ga0175341_11547							Ga0175341_11544	Ga0175341_11489	Ga0175341_11384		Ga0175341_11205	Ga0175341_11639	Ga0175341_11549	Ga0175341_11545	Ga0175341_111045	Ga0175341_11543	Ga0175341_11548		Ga0175341_11377	Ga0175341_11337		Ga0175341_11506	Ga0175341_1172
Chlamydia abortus AB7		Ga0098234_111042	Ga0098234_11315	Ga0098234_11548		Ga0098234_111010		Ga0098234_111045	Ga0098234_11518	Ga0098234_111046		Ga0098234_11551	Ga0098234_11546							Ga0098234_11543	Ga0098234_11488	Ga0098234_11383		Ga0098234_11204	Ga0098234_11638	Ga0098234_11548	Ga0098234_11544	Ga0098234_111043	Ga0098234_11542	Ga0098234_11547		Ga0098234_11376	Ga0098234_11336		Ga0098234_11505	Ga0098234_1172
Chlamydia abortus GIMC 2006:CabB577		Ga0272112_111047	Ga0272112_11316	Ga0272112_11549		Ga0272112_111014		Ga0272112_111050	Ga0272112_11519	Ga0272112_111051		Ga0272112_11552	Ga0272112_11547							Ga0272112_11544	Ga0272112_11489	Ga0272112_11384		Ga0272112_11206	Ga0272112_11639	Ga0272112_11549	Ga0272112_11545	Ga0272112_111048	Ga0272112_11543	Ga0272112_11548		Ga0272112_11377	Ga0272112_11337		Ga0272112_11506	Ga0272112_1174
Chlamydia abortus GN6		Ga0226198_111050	Ga0226198_11313	Ga0226198_11549		Ga0226198_111018		Ga0226198_111053	Ga0226198_11518	Ga0226198_111054		Ga0226198_11552	Ga0226198_11547							Ga0226198_11544	Ga0226198_11488	Ga0226198_11382		Ga0226198_11202	Ga0226198_11641	Ga0226198_11549	Ga0226198_11545	Ga0226198_111051	Ga0226198_11543	Ga0226198_11548		Ga0226198_11375	Ga0226198_11334		Ga0226198_11505	Ga0226198_1172
Chlamydia abortus LLG		Ga0325176_111034	Ga0325176_11311	Ga0325176_11545		Ga0325176_111003		Ga0325176_111037	Ga0325176_11514	Ga0325176_111038		Ga0325176_11548	Ga0325176_11543							Ga0325176_11540	Ga0325176_11484	Ga0325176_11379		Ga0325176_11201	Ga0325176_11630	Ga0325176_11545	Ga0325176_11541	Ga0325176_111035	Ga0325176_11539	Ga0325176_11544		Ga0325176_11372	Ga0325176_11332		Ga0325176_11501	Ga0325176_1174
Chlamydia abortus S26/3		CAB364	CAB069	CAB829		CAB390		CAB362	CAB855	CAB361A		CAB826	CAB831							CAB834	CAB885	CAB006		CAB168	CAB741	CAB829	CAB833	CAB363	CAB835	CAB830		CAB013	CAB049		CAB868	CAB292
Chlamydia avium PV4360_2		Ga0443054_01_206228_206959	Ga0443054_01_950015_951310	Ga0443054_01_685916_688354		Ga0443054_01_227878_228204		Ga0443054_01_202561_204507	Ga0443054_01_723319_725715	Ga0443054_01_202287_202574		Ga0443054_01_684224_685012	Ga0443054_01_689421_690500							Ga0443054_01_692482_693522	Ga0443054_01_757231_758331	Ga0443054_01_874817_875875		Ga0443054_01_2698_4032	Ga0443054_01_592171_593061	Ga0443054_01_685916_688354	Ga0443054_01_691221_692480	Ga0443054_01_204802_206250	Ga0443054_01_693550_694896	Ga0443054_01_688364_689434		Ga0443054_01_886556_888199	Ga0443054_01_927099_930377		Ga0443054_01_739225_740364	Ga0443054_01_132295_132726
Chlamydia caviae GPIC		CCA00377	CCA00067	CCA00863		CCA00403		CCA00374	CCA00887	CCA00373		CCA00860	CCA00865							CCA00868	CCA00917	CCA00006		CCA00171	CCA00773	CCA00863	CCA00867	CCA00376	CCA00869	CCA00864		CCA00013	CCA00048		CCA00900	CCA00295
Chlamydia crocodili No. 12		Ga0593075_01_990904_991623	Ga0593075_01_630804_632051	Ga0593075_01_359980_362415		Ga0593075_01_1018646_1018975		Ga0593075_01_986750_988699	Ga0593075_01_400763_403180	Ga0593075_01_986476_986763		Ga0593075_01_358258_359046	Ga0593075_01_363408_364562							Ga0593075_01_366569_367615	Ga0593075_01_433946_435046	Ga0593075_01_554370_555437		Ga0593075_01_726613_727947	Ga0593075_01_247073_247963	Ga0593075_01_359980_362415	Ga0593075_01_365306_366565	Ga0593075_01_989460_990911	Ga0593075_01_367633_368979	Ga0593075_01_362423_363496		Ga0593075_01_566161_567804	Ga0593075_01_607359_610631		Ga0593075_01_415932_417071	Ga0593075_01_905032_905463
Chlamydia felis Fe/C-56		CF0631	CF0937	CF0153		CF0604		CF0634	CF0127	CF0635		CF0156	CF0151							CF0148	CF0097	CF1000		CF0836	CF0241	CF0153	CF0149	CF0632	CF0147	CF0152		CF0994	CF0956		CF0114	CF0708
Chlamydia gallinacea JX-1		Ga0199085_12962	Ga0199085_12281	Ga0199085_12513		Ga0199085_12935		Ga0199085_12964	Ga0199085_12482	Ga0199085_12965		Ga0199085_12516	Ga0199085_12511							Ga0199085_12508	Ga0199085_12450	Ga0199085_12347		Ga0199085_12175	Ga0199085_12594	Ga0199085_12513	Ga0199085_12509	Ga0199085_12963	Ga0199085_12507	Ga0199085_12512		Ga0199085_12340	Ga0199085_12301		Ga0199085_12468	Ga0199085_1263
Chlamydia muridarum MoPn / Nigg		TC0539	TC0839	TC0143		TC0308		TC0542	TC0112	TC0543		TC0145	TC0141							TC0138	TC0082	TC0006		TC0740	TC0218	TC0143	TC0139	TC0540	TC0137	TC0142		TC0913	TC0054		TC0099	TC0277
Chlamydia muridarum MopnTet14		CmurM_010100002805	CmurM_010100004335	CmurM_010100000795		CmurM_010100001625		CmurM_010100002820	CmurM_010100000565	CmurM_010100002825		CmurM_010100000805	CmurM_010100000785							CmurM_010100000770	CmurM_010100000410	CmurM_010100000035		CmurM_010100003795	CmurM_010100001165	CmurM_010100000795	CmurM_010100000775	CmurM_010100002810	CmurM_010100000765	CmurM_010100000790		CmurM_010100004715	CmurM_010100000270		CmurM_010100000500	CmurM_010100001470
Chlamydia muridarum Nigg 2 MCR		BB17_02895	BB17_04500	BB17_00785		BB17_01645		BB17_02910	BB17_00610	BB17_02915		BB17_00795	BB17_00775							BB17_00760	BB17_00455	BB17_00040		BB17_03945	BB17_01175	BB17_00785	BB17_00765	BB17_02900	BB17_00755	BB17_00780		BB17_04900	BB17_00305		BB17_00545	BB17_01485
Chlamydia muridarum Nigg CM001		Ga0302562_01_649481_650212	Ga0302562_01_973169_974485	Ga0302562_01_174524_176932		Ga0302562_01_364804_365148		Ga0302562_01_651961_653904	Ga0302562_01_130662_133046	Ga0302562_01_653891_654178		Ga0302562_01_177530_178198	Ga0302562_01_172392_173546							Ga0302562_01_169375_170385	Ga0302562_01_98115_99215	Ga0302562_01_6776_7786		Ga0302562_01_881964_883292	Ga0302562_01_259301_260191	Ga0302562_01_174524_176932	Ga0302562_01_170397_171647	Ga0302562_01_650187_651638	Ga0302562_01_167908_169260	Ga0302562_01_173458_174516		Ga0302562_01_1063648_1065258	Ga0302562_01_60400_63642		Ga0302562_01_116535_117674	Ga0302562_01_331571_332002
Chlamydia muridarum Nigg CM002		Ga0302542_01_649474_650205	Ga0302542_01_973160_974476	Ga0302542_01_174517_176925		Ga0302542_01_364796_365140		Ga0302542_01_651954_653897	Ga0302542_01_130656_133040	Ga0302542_01_653884_654171		Ga0302542_01_177523_178191	Ga0302542_01_172385_173539							Ga0302542_01_169368_170378	Ga0302542_01_98109_99209	Ga0302542_01_6776_7786		Ga0302542_01_881955_883283	Ga0302542_01_259295_260185	Ga0302542_01_174517_176925	Ga0302542_01_170390_171640	Ga0302542_01_650180_651631	Ga0302542_01_167901_169253	Ga0302542_01_173451_174509		Ga0302542_01_1063638_1065248	Ga0302542_01_60507_63638		Ga0302542_01_116529_117668	Ga0302542_01_331563_331994
Chlamydia muridarum Nigg CM003		Ga0302573_01_649471_650202	Ga0302573_01_973155_974471	Ga0302573_01_174516_176924		Ga0302573_01_364794_365138		Ga0302573_01_651951_653894	Ga0302573_01_130655_133039	Ga0302573_01_653881_654168		Ga0302573_01_177522_178190	Ga0302573_01_172384_173538							Ga0302573_01_169367_170377	Ga0302573_01_98108_99208	Ga0302573_01_6776_7786		Ga0302573_01_881951_883279	Ga0302573_01_259294_260184	Ga0302573_01_174516_176924	Ga0302573_01_170389_171639	Ga0302573_01_650177_651628	Ga0302573_01_167900_169252	Ga0302573_01_173450_174508		Ga0302573_01_1063633_1065243	Ga0302573_01_60395_63637		Ga0302573_01_116528_117667	Ga0302573_01_331563_331994
Chlamydia muridarum Nigg CM004		Ga0302436_01_649469_650200	Ga0302436_01_973157_974473	Ga0302436_01_174517_176925		Ga0302436_01_364793_365137		Ga0302436_01_651949_653892	Ga0302436_01_130655_133039	Ga0302436_01_653879_654166		Ga0302436_01_177523_178191	Ga0302436_01_172385_173539							Ga0302436_01_169368_170378	Ga0302436_01_98108_99208	Ga0302436_01_6776_7786		Ga0302436_01_881950_883278	Ga0302436_01_259295_260185	Ga0302436_01_174517_176925	Ga0302436_01_170390_171640	Ga0302436_01_650175_651626	Ga0302436_01_167901_169253	Ga0302436_01_173451_174509		Ga0302436_01_1063635_1065245	Ga0302436_01_60395_63637		Ga0302436_01_116528_117667	Ga0302436_01_331562_331993
Chlamydia muridarum Nigg CM005		Ga0302446_01_649472_650203	Ga0302446_01_973157_974473	Ga0302446_01_174516_176924		Ga0302446_01_364793_365137		Ga0302446_01_651952_653895	Ga0302446_01_130655_133039	Ga0302446_01_653882_654169		Ga0302446_01_177522_178190	Ga0302446_01_172384_173538							Ga0302446_01_169367_170377	Ga0302446_01_98108_99208	Ga0302446_01_6776_7786		Ga0302446_01_881952_883280	Ga0302446_01_259294_260184	Ga0302446_01_174516_176924	Ga0302446_01_170389_171639	Ga0302446_01_650178_651629	Ga0302446_01_167900_169252	Ga0302446_01_173450_174508		Ga0302446_01_1063635_1065245	Ga0302446_01_60395_63637		Ga0302446_01_116528_117667	Ga0302446_01_331562_331993
Chlamydia muridarum Nigg CM006		Ga0302655_01_649473_650204	Ga0302655_01_973160_974476	Ga0302655_01_174516_176924		Ga0302655_01_364794_365042		Ga0302655_01_651953_653896	Ga0302655_01_130655_133039	Ga0302655_01_653883_654170		Ga0302655_01_177522_178190	Ga0302655_01_172384_173538							Ga0302655_01_169367_170377	Ga0302655_01_98108_99208	Ga0302655_01_6776_7786		Ga0302655_01_881954_883282	Ga0302655_01_259295_260185	Ga0302655_01_174516_176924	Ga0302655_01_170389_171639	Ga0302655_01_650179_651630	Ga0302655_01_167900_169252	Ga0302655_01_173450_174508		Ga0302655_01_1063640_1065250	Ga0302655_01_60395_63637		Ga0302655_01_116528_117667	Ga0302655_01_331563_331994
Chlamydia muridarum Nigg CM007		Ga0302635_01_649497_650228	Ga0302635_01_973191_974507	Ga0302635_01_174520_176928		Ga0302635_01_364805_365149		Ga0302635_01_651977_653920	Ga0302635_01_130658_133042	Ga0302635_01_653907_654194		Ga0302635_01_177526_178194	Ga0302635_01_172388_173542							Ga0302635_01_169371_170381	Ga0302635_01_98112_99212	Ga0302635_01_6776_7786		Ga0302635_01_881985_883313	Ga0302635_01_259300_260190	Ga0302635_01_174520_176928	Ga0302635_01_170393_171643	Ga0302635_01_650203_651654	Ga0302635_01_167904_169256	Ga0302635_01_173454_174512		Ga0302635_01_1063672_1065282	Ga0302635_01_60398_63640		Ga0302635_01_116532_117671	Ga0302635_01_331573_332004
Chlamydia muridarum Nigg CM008		Ga0302572_01_649477_650208	Ga0302572_01_973162_974478	Ga0302572_01_174521_176929		Ga0302572_01_364798_365142		Ga0302572_01_651957_653900	Ga0302572_01_130660_133044	Ga0302572_01_653887_654174		Ga0302572_01_177527_178195	Ga0302572_01_172389_173543							Ga0302572_01_169372_170382	Ga0302572_01_98113_99213	Ga0302572_01_6776_7786		Ga0302572_01_881957_883285	Ga0302572_01_259299_260189	Ga0302572_01_174521_176929	Ga0302572_01_170394_171644	Ga0302572_01_650183_651634	Ga0302572_01_167905_169257	Ga0302572_01_173455_174513		Ga0302572_01_1063640_1065250	Ga0302572_01_60400_63642		Ga0302572_01_116533_117672	Ga0302572_01_331567_331998
Chlamydia muridarum Nigg CM009		Ga0302440_01_649473_650204	Ga0302440_01_973158_974474	Ga0302440_01_174518_176926		Ga0302440_01_364795_365139		Ga0302440_01_651953_653896	Ga0302440_01_130657_133041	Ga0302440_01_653883_654170		Ga0302440_01_177524_178192	Ga0302440_01_172386_173540							Ga0302440_01_169369_170379	Ga0302440_01_98110_99210	Ga0302440_01_6776_7786		Ga0302440_01_881953_883281	Ga0302440_01_259296_260186	Ga0302440_01_174518_176926	Ga0302440_01_170391_171641	Ga0302440_01_650179_651630	Ga0302440_01_167902_169254	Ga0302440_01_173452_174510		Ga0302440_01_1063636_1065246	Ga0302440_01_60397_63639		Ga0302440_01_116530_117669	Ga0302440_01_331564_331995
Chlamydia muridarum Nigg CM010		Ga0302609_01_649477_650208	Ga0302609_01_973162_974478	Ga0302609_01_174522_176930		Ga0302609_01_364799_365143		Ga0302609_01_651957_653900	Ga0302609_01_130661_133045	Ga0302609_01_653887_654174		Ga0302609_01_177528_178196	Ga0302609_01_172390_173544							Ga0302609_01_169373_170383	Ga0302609_01_98114_99214	Ga0302609_01_6776_7786		Ga0302609_01_881957_883285	Ga0302609_01_259300_260190	Ga0302609_01_174522_176930	Ga0302609_01_170395_171645	Ga0302609_01_650183_651634	Ga0302609_01_167906_169258	Ga0302609_01_173456_174514		Ga0302609_01_1063640_1065250	Ga0302609_01_60401_63643		Ga0302609_01_116534_117673	Ga0302609_01_331568_331999
Chlamydia muridarum Nigg CM012		Ga0302636_01_649473_650204	Ga0302636_01_973158_974474	Ga0302636_01_174520_176928		Ga0302636_01_364797_365141		Ga0302636_01_651953_653896	Ga0302636_01_130659_133043	Ga0302636_01_653883_654170		Ga0302636_01_177526_178194	Ga0302636_01_172388_173542							Ga0302636_01_169371_170381	Ga0302636_01_98112_99212	Ga0302636_01_6776_7786		Ga0302636_01_881953_883281	Ga0302636_01_259298_260188	Ga0302636_01_174520_176928	Ga0302636_01_170393_171643	Ga0302636_01_650179_651630	Ga0302636_01_167904_169256	Ga0302636_01_173454_174512		Ga0302636_01_1063636_1065246	Ga0302636_01_60399_63641		Ga0302636_01_116532_117671	Ga0302636_01_331566_331997
Chlamydia muridarum Nigg CM021		Ga0302481_01_649489_650220	Ga0302481_01_973178_974494	Ga0302481_01_174520_176928		Ga0302481_01_364802_365050		Ga0302481_01_651969_653912	Ga0302481_01_130658_133042	Ga0302481_01_653899_654186		Ga0302481_01_177526_178194	Ga0302481_01_172388_173542							Ga0302481_01_169371_170381	Ga0302481_01_98109_99209	Ga0302481_01_6776_7786		Ga0302481_01_881972_883300	Ga0302481_01_259300_260190	Ga0302481_01_174520_176928	Ga0302481_01_170393_171643	Ga0302481_01_650195_651646	Ga0302481_01_167904_169256	Ga0302481_01_173454_174512		Ga0302481_01_1063656_1065266	Ga0302481_01_60395_63637		Ga0302481_01_116529_117668	Ga0302481_01_331570_332001
Chlamydia muridarum Nigg2 CM972		Ga0175506_11922	Ga0175506_11613	Ga0175506_11379		Ga0175506_11218		Ga0175506_11920	Ga0175506_11414	Ga0175506_11919		Ga0175506_11377	Ga0175506_11381							Ga0175506_11384	Ga0175506_11444	Ga0175506_11522		Ga0175506_11718	Ga0175506_11307	Ga0175506_11379	Ga0175506_11383	Ga0175506_11921	Ga0175506_11385	Ga0175506_11380		Ga0175506_11538	Ga0175506_11472		Ga0175506_11427	Ga0175506_11248
Chlamydia muridarum Nigg3		Ga0321445_11920	Ga0321445_11612	Ga0321445_11378		Ga0321445_11217		Ga0321445_11918	Ga0321445_11413	Ga0321445_11917		Ga0321445_11376	Ga0321445_11380							Ga0321445_11383	Ga0321445_11443	Ga0321445_11521		Ga0321445_11717	Ga0321445_11306	Ga0321445_11378	Ga0321445_11382	Ga0321445_11919	Ga0321445_11384	Ga0321445_11379		Ga0321445_11537	Ga0321445_11471		Ga0321445_11426	Ga0321445_11247
Chlamydia muridarum Nigg3 CMUT3		Ga0175505_11922	Ga0175505_11613	Ga0175505_11379		Ga0175505_11218		Ga0175505_11920	Ga0175505_11414	Ga0175505_11919		Ga0175505_11377	Ga0175505_11381							Ga0175505_11384	Ga0175505_11444	Ga0175505_11522		Ga0175505_11718	Ga0175505_11307	Ga0175505_11379	Ga0175505_11383	Ga0175505_11921	Ga0175505_11385	Ga0175505_11380		Ga0175505_11538	Ga0175505_11472		Ga0175505_11427	Ga0175505_11248
Chlamydia muridarum Nigg3 G0.1.1		Ga0174851_11922	Ga0174851_11613	Ga0174851_11379		Ga0174851_11218		Ga0174851_11920	Ga0174851_11414	Ga0174851_11919		Ga0174851_11377	Ga0174851_11381							Ga0174851_11384	Ga0174851_11444	Ga0174851_11522		Ga0174851_11718	Ga0174851_11307	Ga0174851_11379	Ga0174851_11383	Ga0174851_11921	Ga0174851_11385	Ga0174851_11380		Ga0174851_11538	Ga0174851_11472		Ga0174851_11427	Ga0174851_11248
Chlamydia muridarum Nigg3 G28.38.1		Ga0174852_11922	Ga0174852_11613	Ga0174852_11379		Ga0174852_11218		Ga0174852_11920	Ga0174852_11414	Ga0174852_11919		Ga0174852_11377	Ga0174852_11381							Ga0174852_11384	Ga0174852_11444	Ga0174852_11522		Ga0174852_11718	Ga0174852_11307	Ga0174852_11379	Ga0174852_11383	Ga0174852_11921	Ga0174852_11385	Ga0174852_11380		Ga0174852_11538	Ga0174852_11472		Ga0174852_11427	Ga0174852_11248
Chlamydia muridarum Nigg3-28		Ga0349651_01_649477_650208	Ga0349651_01_973162_974478	Ga0349651_01_174522_176930		Ga0349651_01_364799_365143		Ga0349651_01_651957_653900	Ga0349651_01_130661_133045	Ga0349651_01_653887_654174		Ga0349651_01_177528_178196	Ga0349651_01_172390_173544							Ga0349651_01_169373_170383	Ga0349651_01_98114_99214	Ga0349651_01_6776_7786		Ga0349651_01_881957_883285	Ga0349651_01_259300_260190	Ga0349651_01_174522_176930	Ga0349651_01_170395_171645	Ga0349651_01_650183_651634	Ga0349651_01_167906_169258	Ga0349651_01_173456_174514		Ga0349651_01_1063640_1065250	Ga0349651_01_60401_63643		Ga0349651_01_116534_117673	Ga0349651_01_331568_331999
Chlamydia pecorum E58		G5S_0716	G5S_0373	G5S_0127		G5S_0746		G5S_0714	G5S_0160	G5S_0713		G5S_0124	G5S_0129							G5S_0132	G5S_0192	G5S_0304		G5S_0488	G5S_0048	G5S_0127	G5S_0131	G5S_0715	G5S_0133	G5S_0128		G5S_0312	G5S_0354		G5S_0174	G5S_0635
Chlamydia pecorum NSW/Bov/SBE		Ga0587180_01_710868_711542	Ga0587180_01_386736_388025	Ga0587180_01_126996_129422		Ga0587180_01_736202_736531		Ga0587180_01_707263_709206	Ga0587180_01_164395_166812	Ga0587180_01_706989_707276		Ga0587180_01_125331_126128	Ga0587180_01_130473_131555							Ga0587180_01_133511_134566	Ga0587180_01_197580_198680	Ga0587180_01_312583_313593		Ga0587180_01_478626_479978	Ga0587180_01_41914_42837	Ga0587180_01_126996_129422	Ga0587180_01_132251_133510	Ga0587180_01_709424_710875	Ga0587180_01_134581_135924	Ga0587180_01_129431_130489		Ga0587180_01_324287_325924	Ga0587180_01_364430_367675		Ga0587180_01_179597_180736	Ga0587180_01_636189_636620
Chlamydia pecorum P787		CPE3_0366	CPE3_0072	CPE3_0818		CPE3_0391		CPE3_0364	CPE3_0846	CPE3_0363		CPE3_0815	CPE3_0820							CPE3_0823	CPE3_0876	CPE3_0007		CPE3_0176	CPE3_0745	CPE3_0818	CPE3_0822	CPE3_0365	CPE3_0824	CPE3_0819		CPE3_0014	CPE3_0054		CPE3_0859	CPE3_0296
Chlamydia pecorum PV3056/3		CPE1_0366	CPE1_0072	CPE1_0817		CPE1_0391		CPE1_0364	CPE1_0845	CPE1_0363		CPE1_0814	CPE1_0819							CPE1_0822	CPE1_0875	CPE1_0007		CPE1_0176	CPE1_0744	CPE1_0817	CPE1_0821	CPE1_0365	CPE1_0823	CPE1_0818		CPE1_0014	CPE1_0054		CPE1_0858	CPE1_0296
Chlamydia pecorum W73		CPE2_0366	CPE2_0072	CPE2_0818		CPE2_0391		CPE2_0364	CPE2_0846	CPE2_0363		CPE2_0815	CPE2_0820							CPE2_0823	CPE2_0876	CPE2_0007		CPE2_0176	CPE2_0745	CPE2_0818	CPE2_0822	CPE2_0365	CPE2_0824	CPE2_0819		CPE2_0014	CPE2_0054		CPE2_0859	CPE2_0296
Chlamydia pneumoniae AR39		CP0337	CP0075	CP0961		CP0362		CP0335	CP0989	CP0334		CP0958	CP0963							CP0966	CP1019	CP0006		CP0178	CP0867	CP0961	CP0965	CP0336	CP0967	CP0962		CP0016	CP0052		CP1002	CP0781
Chlamydia pneumoniae CM1		Ga0123736_111095	Ga0123736_11255	Ga0123736_11501		Ga0123736_111069		Ga0123736_111097	Ga0123736_11470	Ga0123736_111098		Ga0123736_11504	Ga0123736_11499							Ga0123736_11496	Ga0123736_11440	Ga0123736_11326		Ga0123736_11148	Ga0123736_11586	Ga0123736_11501	Ga0123736_11497	Ga0123736_111096	Ga0123736_11495	Ga0123736_11500		Ga0123736_11318	Ga0123736_11277		Ga0123736_11457	Ga0123736_11670
Chlamydia pneumoniae CV14		Ga0123810_111091	Ga0123810_11255	Ga0123810_11501		Ga0123810_111065		Ga0123810_111093	Ga0123810_11470	Ga0123810_111094		Ga0123810_11504	Ga0123810_11499							Ga0123810_11496	Ga0123810_11440	Ga0123810_11326		Ga0123810_11148	Ga0123810_11584	Ga0123810_11501	Ga0123810_11497	Ga0123810_111092	Ga0123810_11495	Ga0123810_11500		Ga0123810_11318	Ga0123810_11277		Ga0123810_11457	Ga0123810_11667
Chlamydia pneumoniae CWL011		Ga0123809_111094	Ga0123809_11256	Ga0123809_11502		Ga0123809_111068		Ga0123809_111096	Ga0123809_11471	Ga0123809_111097		Ga0123809_11505	Ga0123809_11500							Ga0123809_11497	Ga0123809_11441	Ga0123809_11327		Ga0123809_11149	Ga0123809_11585	Ga0123809_11502	Ga0123809_11498	Ga0123809_111095	Ga0123809_11496	Ga0123809_11501		Ga0123809_11319	Ga0123809_11278		Ga0123809_11458	Ga0123809_11668
Chlamydia pneumoniae CWL029		CPn0417	CPn0672	CPn0905		CPn0393		CPn0419	CPn0880	CPn0420		CPn0908	CPn0903							CPn0900	CPn0850	CPn0739		CPn0571	CPn0988	CPn0905	CPn0901	CPn0418	CPn0899	CPn0904		CPn0730	CPn0694		CPn0867	CPn1069
Chlamydia pneumoniae J138		CPj0417	CPj0672	CPj0905		CPj0393		CPj0419	CPj0880	CPj0420		CPj0908	CPj0903							CPj0900	CPj0850	CPj0739		CPj0571	CPj0988	CPj0905	CPj0901	CPj0418	CPj0899	CPj0904		CPj0730	CPj0694		CPj0867	CPj1069
Chlamydia pneumoniae K7		Ga0123808_111096	Ga0123808_11257	Ga0123808_11503		Ga0123808_111070		Ga0123808_111098	Ga0123808_11472	Ga0123808_111099		Ga0123808_11506	Ga0123808_11501							Ga0123808_11498	Ga0123808_11442	Ga0123808_11328		Ga0123808_11150	Ga0123808_11586	Ga0123808_11503	Ga0123808_11499	Ga0123808_111097	Ga0123808_11497	Ga0123808_11502		Ga0123808_11320	Ga0123808_11279		Ga0123808_11459	Ga0123808_11669
Chlamydia pneumoniae LPCoLN		CPK_ORF00926	CPK_ORF00072	CPK_ORF00317		CPK_ORF00903		CPK_ORF00928	CPK_ORF00287	CPK_ORF00929		CPK_ORF00320	CPK_ORF00315							CPK_ORF00312	CPK_ORF00256	CPK_ORF00144		CPK_ORF01087	CPK_ORF00412	CPK_ORF00317	CPK_ORF00313	CPK_ORF00927	CPK_ORF00311	CPK_ORF00316		CPK_ORF00135	CPK_ORF00097		CPK_ORF00274	CPK_ORF00494
Chlamydia pneumoniae PB2		Ga0123737_111094	Ga0123737_11257	Ga0123737_11503		Ga0123737_111068		Ga0123737_111096	Ga0123737_11472	Ga0123737_111097		Ga0123737_11506	Ga0123737_11501							Ga0123737_11498	Ga0123737_11442	Ga0123737_11328		Ga0123737_11150	Ga0123737_11586	Ga0123737_11503	Ga0123737_11499	Ga0123737_111095	Ga0123737_11497	Ga0123737_11502		Ga0123737_11320	Ga0123737_11279		Ga0123737_11459	Ga0123737_11669
Chlamydia pneumoniae TW-183		CpB0433	CpB0698	CpB0937		CpB0405		CpB0435	CpB0909	CpB0436		CpB0940	CpB0935							CpB0932	CpB0879	CpB0766		CpB0592	CpB1024	CpB0937	CpB0933	CpB0434	CpB0931	CpB0936		CpB0758	CpB0721		CpB0896	CpB1114
Chlamydia pneumoniae Wien1		Ga0125056_111091	Ga0125056_11255	Ga0125056_11501		Ga0125056_111065		Ga0125056_111093	Ga0125056_11470	Ga0125056_111094		Ga0125056_11504	Ga0125056_11499							Ga0125056_11496	Ga0125056_11440	Ga0125056_11326		Ga0125056_11148	Ga0125056_11584	Ga0125056_11501	Ga0125056_11497	Ga0125056_111092	Ga0125056_11495	Ga0125056_11500		Ga0125056_11318	Ga0125056_11277		Ga0125056_11457	Ga0125056_11667
Chlamydia pneumoniae Wien3		Ga0125112_111092	Ga0125112_11255	Ga0125112_11501		Ga0125112_111066		Ga0125112_111094	Ga0125112_11470	Ga0125112_111095		Ga0125112_11504	Ga0125112_11499							Ga0125112_11496	Ga0125112_11440	Ga0125112_11326		Ga0125112_11148	Ga0125112_11584	Ga0125112_11501	Ga0125112_11497	Ga0125112_111093	Ga0125112_11495	Ga0125112_11500		Ga0125112_11318	Ga0125112_11277		Ga0125112_11457	Ga0125112_11667
Chlamydia psittaci 01DC11		CPS0A_0413	CPS0A_0081	CPS0A_0929		CPS0A_0444		CPS0A_0409	CPS0A_0962	CPS0A_0408		CPS0A_0926	CPS0A_0931							CPS0A_0934	CPS0A_0994	CPS0A_0008		CPS0A_0199	CPS0A_0839	CPS0A_0929	CPS0A_0933	CPS0A_0412	CPS0A_0935	CPS0A_0930		CPS0A_0016	CPS0A_0061		CPS0A_0976	CPS0A_0331
Chlamydia psittaci 01DC12		BN356_3731	BN356_0731	BN356_8471		BN356_4001		BN356_3701	BN356_8761	BN356_3691		BN356_8441	BN356_8491							BN356_8521	BN356_9061	BN356_0061		BN356_1791	BN356_7641	BN356_8471	BN356_8511	BN356_3721	BN356_8531	BN356_8481		BN356_0131	BN356_0541		BN356_8891	BN356_2981
Chlamydia psittaci 02DC15		CPS0B_0412	CPS0B_0081	CPS0B_0916		CPS0B_0441		CPS0B_0408	CPS0B_0949	CPS0B_0407		CPS0B_0913	CPS0B_0918							CPS0B_0921	CPS0B_0980	CPS0B_0008		CPS0B_0195	CPS0B_0829	CPS0B_0916	CPS0B_0920	CPS0B_0411	CPS0B_0922	CPS0B_0917		CPS0B_0016	CPS0B_0061		CPS0B_0963	CPS0B_0330
Chlamydia psittaci 08DC60		CPS0D_0413	CPS0D_0079	CPS0D_0926		CPS0D_0443		CPS0D_0409	CPS0D_0957	CPS0D_0408		CPS0D_0923	CPS0D_0928							CPS0D_0931	CPS0D_0989	CPS0D_0008		CPS0D_0193	CPS0D_0838	CPS0D_0926	CPS0D_0930	CPS0D_0412	CPS0D_0932	CPS0D_0927		CPS0D_0016	CPS0D_0059		CPS0D_0971	CPS0D_0334
Chlamydia psittaci 6BC		CPSIT_0407	CPSIT_0079	CPSIT_0909		CPSIT_0437		CPSIT_0403	CPSIT_0940	CPSIT_0402		CPSIT_0906	CPSIT_0911							CPSIT_0914	CPSIT_0971	CPSIT_0008		CPSIT_0193	CPSIT_0821	CPSIT_0909	CPSIT_0913	CPSIT_0406	CPSIT_0915	CPSIT_0910		CPSIT_0016	CPSIT_0059		CPSIT_0954	CPSIT_0325
Chlamydia psittaci 6BC		G5O_0404	G5O_0083	G5O_0901		G5O_0433		G5O_0402	G5O_0932	G5O_0401		G5O_0898	G5O_0903							G5O_0906	G5O_0964	G5O_0014		G5O_0196	G5O_0812	G5O_0901	G5O_0905	G5O_0403	G5O_0907	G5O_0902		G5O_0021	G5O_0063		G5O_0946	G5O_0331
Chlamydia psittaci 84/55		B595_0433	B595_0084	B595_0981		B595_0466		B595_0429	B595_1017	B595_0427			B595_0983							B595_0986	B595_1051	B595_0009		B595_0198	B595_0886	B595_0981	B595_0985	B595_0432	B595_0988	B595_0982		B595_0018	B595_0064		B595_1031	B595_0345
Chlamydia psittaci 8882_placenta		Ga0587207_01_424233_424952	Ga0587207_01_83406_84707	Ga0587207_01_978597_981029		Ga0587207_01_451312_451641		Ga0587207_01_420067_422016	Ga0587207_01_1019894_1022305	Ga0587207_01_419793_420080		Ga0587207_01_976877_977665	Ga0587207_01_982023_983177							Ga0587207_01_985187_986230	Ga0587207_01_1053071_1054171	Ga0587207_01_6797_7864		Ga0587207_01_179487_180821	Ga0587207_01_876719_877609	Ga0587207_01_978597_981029	Ga0587207_01_983921_985183	Ga0587207_01_422789_424240	Ga0587207_01_986249_987595	Ga0587207_01_981038_982111		Ga0587207_01_18584_20227	Ga0587207_01_59898_63170		Ga0587207_01_1035059_1036198	Ga0587207_01_342735_343166
Chlamydia psittaci 9945_foetus		Ga0587213_01_424236_424955	Ga0587213_01_83406_84707	Ga0587213_01_978595_981027		Ga0587213_01_451315_451644		Ga0587213_01_420070_422019	Ga0587213_01_1019337_1021748	Ga0587213_01_419796_420083		Ga0587213_01_976875_977663	Ga0587213_01_982021_983175							Ga0587213_01_985185_986228	Ga0587213_01_1052514_1053614	Ga0587213_01_6797_7864		Ga0587213_01_179487_180821	Ga0587213_01_876717_877607	Ga0587213_01_978595_981027	Ga0587213_01_983919_985181	Ga0587213_01_422792_424243	Ga0587213_01_986247_987593	Ga0587213_01_981036_982109		Ga0587213_01_18584_20227	Ga0587213_01_59898_63170		Ga0587213_01_1034502_1035641	Ga0587213_01_342738_343169
Chlamydia psittaci C19/98		CPS0C_0414	CPS0C_0080	CPS0C_0927		CPS0C_0445		CPS0C_0410	CPS0C_0958	CPS0C_0409		CPS0C_0924	CPS0C_0929							CPS0C_0932	CPS0C_0989	CPS0C_0008		CPS0C_0196	CPS0C_0840	CPS0C_0927	CPS0C_0931	CPS0C_0413	CPS0C_0933	CPS0C_0928		CPS0C_0016	CPS0C_0060		CPS0C_0972	CPS0C_0331
Chlamydia psittaci CP3		B711_0435	B711_0083	B711_0979		B711_0466		B711_0431	B711_1013	B711_0430		B711_0976	B711_0981							B711_0984	B711_1045	B711_0009		B711_0199	B711_0887	B711_0979	B711_0983	B711_0434	B711_0985	B711_0980		B711_0018	B711_0063		B711_1027	B711_0349
Chlamydia psittaci Ful127		Ga0399235_01_426914_427633	Ga0399235_01_83448_84722	Ga0399235_01_983910_986342		Ga0399235_01_453994_454323		Ga0399235_01_422748_424697	Ga0399235_01_1024941_1027019	Ga0399235_01_422474_422761		Ga0399235_01_982211_982978	Ga0399235_01_987336_988490							Ga0399235_01_990500_991543	Ga0399235_01_1057785_1058885	Ga0399235_01_6838_7905		Ga0399235_01_179528_180862	Ga0399235_01_882037_882927	Ga0399235_01_983910_986342	Ga0399235_01_989234_990496	Ga0399235_01_425470_426921	Ga0399235_01_991562_992908	Ga0399235_01_986351_987424		Ga0399235_01_18626_20269	Ga0399235_01_59940_63212		Ga0399235_01_1039773_1040657	Ga0399235_01_345551_345982
Chlamydia psittaci GIMC 2003:Cps25SM		Ga0258902_01_425723_426442	Ga0258902_01_83004_84278	Ga0258902_01_980284_982716		Ga0258902_01_452758_453087		Ga0258902_01_421557_423506	Ga0258902_01_1021224_1023302	Ga0258902_01_421283_421570		Ga0258902_01_978585_979352	Ga0258902_01_983710_984864							Ga0258902_01_986874_987917	Ga0258902_01_1053894_1054994	Ga0258902_01_6699_7766		Ga0258902_01_178928_180262	Ga0258902_01_877817_878707	Ga0258902_01_980284_982716	Ga0258902_01_985608_986870	Ga0258902_01_424279_425730	Ga0258902_01_987936_989282	Ga0258902_01_982725_983798		Ga0258902_01_18486_20129	Ga0258902_01_59611_62883		Ga0258902_01_1036056_1036994	Ga0258902_01_344310_344741
Chlamydia psittaci GIMC 2004:CpsAP23		Ga0258751_01_427077_427796	Ga0258751_01_83406_84680	Ga0258751_01_984875_987307		Ga0258751_01_454156_454485		Ga0258751_01_422911_424860	Ga0258751_01_1025948_1028026	Ga0258751_01_422637_422924		Ga0258751_01_983176_983943	Ga0258751_01_988301_989455							Ga0258751_01_991465_992508	Ga0258751_01_1058792_1059892	Ga0258751_01_6797_7864		Ga0258751_01_179487_180821	Ga0258751_01_882195_883085	Ga0258751_01_984875_987307	Ga0258751_01_990199_991461	Ga0258751_01_425633_427084	Ga0258751_01_992527_993873	Ga0258751_01_987316_988389		Ga0258751_01_18584_20227	Ga0258751_01_59898_63170		Ga0258751_01_1040780_1041664	Ga0258751_01_345580_346011
Chlamydia psittaci GIMC 2005:CpsCP1		Ga0259056_01_427077_427796	Ga0259056_01_83406_84680	Ga0259056_01_984907_987339		Ga0259056_01_454156_454485		Ga0259056_01_422911_424860	Ga0259056_01_1025965_1028043	Ga0259056_01_422637_422924		Ga0259056_01_983187_983975	Ga0259056_01_988333_989487							Ga0259056_01_991497_992540	Ga0259056_01_1058809_1059909	Ga0259056_01_6797_7864		Ga0259056_01_179487_180821	Ga0259056_01_882227_883117	Ga0259056_01_984907_987339	Ga0259056_01_990231_991493	Ga0259056_01_425633_427084	Ga0259056_01_992559_993905	Ga0259056_01_987348_988421		Ga0259056_01_18584_20227	Ga0259056_01_59898_63170		Ga0259056_01_1040797_1041681	Ga0259056_01_345580_346011
Chlamydia psittaci GR9		B598_0411	B598_0081	B598_0915		B598_0442		B598_0407	B598_0950	B598_0406		B598_0912	B598_0917							B598_0920	B598_0982	B598_0008		B598_0193	B598_0822	B598_0915	B598_0919	B598_0410	B598_0921	B598_0916		B598_0019	B598_0061		B598_0964	B598_0327
Chlamydia psittaci Horse_pl		Ga0259199_01_424221_424940	Ga0259199_01_83406_84707	Ga0259199_01_982166_984598		Ga0259199_01_451300_451629		Ga0259199_01_420055_422004	Ga0259199_01_1023237_1025315	Ga0259199_01_419781_420068		Ga0259199_01_980446_981234	Ga0259199_01_985592_986746							Ga0259199_01_988756_989799	Ga0259199_01_1056081_1057181	Ga0259199_01_6797_7864		Ga0259199_01_179487_180821	Ga0259199_01_879486_880376	Ga0259199_01_982166_984598	Ga0259199_01_987490_988752	Ga0259199_01_422777_424228	Ga0259199_01_989818_991164	Ga0259199_01_984607_985680		Ga0259199_01_18584_20227	Ga0259199_01_59898_63170		Ga0259199_01_1038069_1038953	Ga0259199_01_342724_343155
Chlamydia psittaci M56		B602_0408	B602_0079	B602_0918		B602_0439		B602_0404	B602_0952	B602_0403		B602_0915	B602_0920							B602_0923	B602_0986	B602_0008		B602_0193	B602_0829	B602_0918	B602_0922	B602_0407	B602_0924	B602_0919		B602_0016	B602_0059		B602_0966	B602_0326
Chlamydia psittaci Mat116		AO9_01960	AO9_00355	AO9_04425		AO9_02115		AO9_01945	AO9_04555			AO9_04410	AO9_04435							AO9_04450	AO9_04710	AO9_00030		AO9_00915	AO9_03975	AO9_04425	AO9_04445	AO9_01955	AO9_04455	AO9_04430		AO9_00065			AO9_04625	AO9_01590
Chlamydia psittaci MN		B599_0407	B599_0081	B599_0915		B599_0438		B599_0403	B599_0950			B599_0912	B599_0917							B599_0920	B599_0982	B599_0008		B599_0194	B599_0827	B599_0915	B599_0919	B599_0406	B599_0922	B599_0916		B599_0017	B599_0061		B599_0964	B599_0326
Chlamydia psittaci NJ1		B712_0408	B712_0079	B712_0919		B712_0440		B712_0404	B712_0952	B712_0403		B712_0916	B712_0921							B712_0924	B712_0984	B712_0008		B712_0194	B712_0829	B712_0919	B712_0923	B712_0407	B712_0925	B712_0920		B712_0016	B712_0059		B712_0966	B712_0327
Chlamydia psittaci WC		B603_0414	B603_0081	B603_0921		B603_0445		B603_0410	B603_0956	B603_0409		B603_0918	B603_0923							B603_0926	B603_0989	B603_0008		B603_0194	B603_0831	B603_0921	B603_0925	B603_0413	B603_0927	B603_0922		B603_0017	B603_0061		B603_0970	B603_0333
Chlamydia psittaci WS/RT/E30		B601_0410	B601_0079	B601_0920		B601_0442		B601_0406	B601_0957	B601_0405			B601_0922							B601_0925	B601_0989	B601_0008		B601_0191	B601_0826	B601_0920	B601_0924	B601_0409	B601_0927	B601_0921		B601_0017	B601_0059		B601_0971	B601_0327
Chlamydia sp. 08-1274/3		Ga0213608_11951	Ga0213608_11282	Ga0213608_11512		Ga0213608_11925		Ga0213608_11953	Ga0213608_11482	Ga0213608_11954		Ga0213608_11515	Ga0213608_11510							Ga0213608_11507	Ga0213608_11451	Ga0213608_11348		Ga0213608_11176	Ga0213608_11591	Ga0213608_11512	Ga0213608_11508	Ga0213608_11952	Ga0213608_11506	Ga0213608_11511		Ga0213608_11341	Ga0213608_11302		Ga0213608_11468	Ga0213608_1162
Chlamydia sp. 10DC88		M832_01850	M832_08700	M832_06300		M832_02110		M832_01830	M832_06640	M832_01820		M832_06270	M832_06320							M832_06350	M832_06970	M832_08040		M832_00020	M832_05440	M832_06300	M832_06340	M832_01840	M832_06360	M832_06310		M832_08120	M832_08490		M832_06790	M832_01150
Chlamydia sp. 2742-308		Ga0175327_11991	Ga0175327_11304	Ga0175327_11547		Ga0175327_11966		Ga0175327_11993	Ga0175327_11515	Ga0175327_11994		Ga0175327_11550	Ga0175327_11545							Ga0175327_11542	Ga0175327_11485	Ga0175327_11376		Ga0175327_11196	Ga0175327_11621	Ga0175327_11547	Ga0175327_11543	Ga0175327_11992	Ga0175327_11541	Ga0175327_11546		Ga0175327_11369	Ga0175327_11327		Ga0175327_11502	Ga0175327_1165
Chlamydia sp. H15-1957-10C		Ga0398290_01_438413_439129	Ga0398290_01_723649_724959	Ga0398290_01_1007610_1010042		Ga0398290_01_416452_416799		Ga0398290_01_442398_444344	Ga0398290_01_969100_971187	Ga0398290_01_444331_444618		Ga0398290_01_1010956_1011765	Ga0398290_01_1005464_1006621							Ga0398290_01_1002436_1003485	Ga0398290_01_936881_937981	Ga0398290_01_805668_806684		Ga0398290_01_629814_631190	Ga0398290_01_1103220_1104134	Ga0398290_01_1007610_1010042	Ga0398290_01_1003488_1004741	Ga0398290_01_439122_440573	Ga0398290_01_1001076_1002419	Ga0398290_01_1006530_1007600		Ga0398290_01_791688_793331	Ga0398290_01_748126_751398		Ga0398290_01_955164_956303	Ga0398290_01_1192030_1192461
Chlamydia sp. S15-834K		Ga0399648_01_426464_427183	Ga0399648_01_83260_84507	Ga0399648_01_969241_971676		Ga0399648_01_453950_454279		Ga0399648_01_422320_424269	Ga0399648_01_1008490_1010826	Ga0399648_01_422046_422333		Ga0399648_01_967541_968308	Ga0399648_01_972669_973823							Ga0399648_01_975818_976864	Ga0399648_01_1041590_1042690	Ga0399648_01_6892_7959		Ga0399648_01_178646_179980	Ga0399648_01_863773_864663	Ga0399648_01_969241_971676	Ga0399648_01_974555_975814	Ga0399648_01_425020_426471	Ga0399648_01_976882_978228	Ga0399648_01_971684_972757		Ga0399648_01_18684_20327	Ga0399648_01_59849_63124		Ga0399648_01_1023577_1024716	Ga0399648_01_343507_343938
Chlamydia suis 2-26b		Ga0325230_01_334250_334969	Ga0325230_01_658086_659402	Ga0325230_01_936417_938825		Ga0325230_01_43199_43543		Ga0325230_01_336712_338655	Ga0325230_01_888651_891011	Ga0325230_01_338642_338929		Ga0325230_01_939445_940251	Ga0325230_01_934285_935439							Ga0325230_01_931265_932275	Ga0325230_01_856097_857197	Ga0325230_01_764674_765684		Ga0325230_01_567151_568479	Ga0325230_01_1020287_1021165	Ga0325230_01_936417_938825	Ga0325230_01_932287_933537	Ga0325230_01_334944_336395	Ga0325230_01_929796_931148	Ga0325230_01_935351_936409		Ga0325230_01_748568_750178	Ga0325230_01_818362_821604		Ga0325230_01_874467_875630	Ga0325230_01_9910_10341
Chlamydia suis 3-25b		Ga0325158_01_324410_325129	Ga0325158_01_652920_654236	Ga0325158_01_927599_930007		Ga0325158_01_43087_43431		Ga0325158_01_326870_328813	Ga0325158_01_883583_885943	Ga0325158_01_328800_329087		Ga0325158_01_930627_931316	Ga0325158_01_925467_926621							Ga0325158_01_922513_923442	Ga0325158_01_851048_852148	Ga0325158_01_759552_760562		Ga0325158_01_561715_563043	Ga0325158_01_1011467_1012345	Ga0325158_01_927599_930007	Ga0325158_01_923454_924704	Ga0325158_01_325104_326555	Ga0325158_01_920964_922316	Ga0325158_01_926533_927591		Ga0325158_01_743461_745071	Ga0325158_01_813299_816541		Ga0325158_01_869409_870572	Ga0325158_01_9951_10382
Chlamydia suis 4-29b		Ga0325141_01_325502_326221	Ga0325141_01_656411_657727	Ga0325141_01_946574_948982		Ga0325141_01_43069_43413		Ga0325141_01_327963_329906	Ga0325141_01_886925_889285	Ga0325141_01_329893_330180		Ga0325141_01_949602_950291	Ga0325141_01_944442_945596							Ga0325141_01_941407_942417	Ga0325141_01_854389_855489	Ga0325141_01_763023_764033		Ga0325141_01_564486_565814	Ga0325141_01_1030437_1031315	Ga0325141_01_946574_948982	Ga0325141_01_942429_943679	Ga0325141_01_326196_327647	Ga0325141_01_939939_941291	Ga0325141_01_945508_946566		Ga0325141_01_746932_748542	Ga0325141_01_816642_819884		Ga0325141_01_872750_873913	Ga0325141_01_9956_10387
Chlamydia suis 5-22b		Ga0325129_01_331391_332110	Ga0325129_01_656308_657624	Ga0325129_01_946823_949231		Ga0325129_01_43203_43547		Ga0325129_01_333852_335795	Ga0325129_01_886931_889291	Ga0325129_01_335782_336069		Ga0325129_01_949851_950657	Ga0325129_01_944691_945845							Ga0325129_01_941671_942681	Ga0325129_01_854377_855477	Ga0325129_01_762935_763945		Ga0325129_01_564731_566059	Ga0325129_01_1030696_1031574	Ga0325129_01_946823_949231	Ga0325129_01_942693_943943	Ga0325129_01_332085_333536	Ga0325129_01_940201_941553	Ga0325129_01_945757_946815		Ga0325129_01_746829_748439	Ga0325129_01_816642_819884		Ga0325129_01_872748_873911	Ga0325129_01_9910_10341
Chlamydia suis 5-27b		Ga0325188_01_332702_333421	Ga0325188_01_668400_669716	Ga0325188_01_954578_956986		Ga0325188_01_43077_43421		Ga0325188_01_335162_337105	Ga0325188_01_898980_901340	Ga0325188_01_337092_337379		Ga0325188_01_957607_958413	Ga0325188_01_952446_953600							Ga0325188_01_949492_950421	Ga0325188_01_866445_867545	Ga0325188_01_775024_776034		Ga0325188_01_576810_578138	Ga0325188_01_1038446_1039324	Ga0325188_01_954578_956986	Ga0325188_01_950433_951683	Ga0325188_01_333396_334847	Ga0325188_01_947943_949295	Ga0325188_01_953512_954570		Ga0325188_01_758933_760543	Ga0325188_01_828700_831942		Ga0325188_01_884805_885968	Ga0325188_01_9961_10392
Chlamydia suis 9-1b		Ga0325139_01_331455_332174	Ga0325139_01_656667_657983	Ga0325139_01_934715_937123		Ga0325139_01_43203_43547		Ga0325139_01_333917_335860	Ga0325139_01_887262_889622	Ga0325139_01_335847_336134		Ga0325139_01_937742_938548	Ga0325139_01_932583_933737							Ga0325139_01_929644_930573	Ga0325139_01_854708_855808	Ga0325139_01_763267_764277		Ga0325139_01_565414_566742	Ga0325139_01_1018598_1019476	Ga0325139_01_934715_937123	Ga0325139_01_930585_931835	Ga0325139_01_332149_333600	Ga0325139_01_928093_929445	Ga0325139_01_933649_934707		Ga0325139_01_747161_748771	Ga0325139_01_816971_820213		Ga0325139_01_873078_874241	Ga0325139_01_9910_10341
Chlamydia suis SWA-14		Ga0226090_12932	Ga0226090_12624	Ga0226090_12388		Ga0226090_12228		Ga0226090_12930	Ga0226090_12423	Ga0226090_12929		Ga0226090_12386	Ga0226090_12390							Ga0226090_12393	Ga0226090_12454	Ga0226090_12532		Ga0226090_12729	Ga0226090_12316	Ga0226090_12388	Ga0226090_12392	Ga0226090_12931	Ga0226090_12394	Ga0226090_12389		Ga0226090_12548	Ga0226090_12482		Ga0226090_12436	Ga0226090_12258
Chlamydia suis SWA-2		Ga0226275_12929	Ga0226275_12622	Ga0226275_12388		Ga0226275_12227		Ga0226275_12927	Ga0226275_12422	Ga0226275_12926		Ga0226275_12386	Ga0226275_12390							Ga0226275_12393	Ga0226275_12452	Ga0226275_12530		Ga0226275_12727	Ga0226275_12316	Ga0226275_12388	Ga0226275_12392	Ga0226275_12928	Ga0226275_12394	Ga0226275_12389		Ga0226275_12546	Ga0226275_12480		Ga0226275_12435	Ga0226275_12257
Chlamydia suis SWA-86		Ga0226586_12932	Ga0226586_12622	Ga0226586_12388		Ga0226586_12226		Ga0226586_12930	Ga0226586_12422	Ga0226586_12929		Ga0226586_12386	Ga0226586_12390							Ga0226586_12393	Ga0226586_12452	Ga0226586_12530		Ga0226586_12727	Ga0226586_12315	Ga0226586_12388	Ga0226586_12392	Ga0226586_12931	Ga0226586_12394	Ga0226586_12389		Ga0226586_12546	Ga0226586_12480		Ga0226586_12435	Ga0226586_12256
Chlamydia trachomatis 434Bu Hefty_Parental		Ga0226359_01_617769_618488	Ga0226359_01_938618_939931	Ga0226359_01_174783_177194		Ga0226359_01_365028_365372		Ga0226359_01_620237_622180	Ga0226359_01_130774_133173	Ga0226359_01_622167_622454		Ga0226359_01_177808_178425	Ga0226359_01_172654_173811							Ga0226359_01_169692_170642	Ga0226359_01_98128_99228	Ga0226359_01_6522_7532		Ga0226359_01_847935_849269	Ga0226359_01_259993_260868	Ga0226359_01_174783_177194	Ga0226359_01_170654_171904	Ga0226359_01_618463_619914	Ga0226359_01_168134_169486	Ga0226359_01_173720_174778		Ga0226359_01_1029228_1030838	Ga0226359_01_60428_63670		Ga0226359_01_116602_117741	Ga0226359_01_331609_332040
Chlamydia trachomatis A/363		A363_00285	A363_00593	A363_00824		A363_00040		A363_00287	A363_00793	A363_00288		A363_00826	A363_00822							A363_00819	A363_00763	A363_00685		A363_00489	A363_00896	A363_00824	A363_00820	A363_00286	A363_00818	A363_00823		A363_00669	A363_00735		A363_00780	A363_00010
Chlamydia trachomatis A/7249		A7249_00284	A7249_00591	A7249_00822		A7249_00040		A7249_00286	A7249_00791	A7249_00287		A7249_00824	A7249_00820							A7249_00817	A7249_00761	A7249_00683		A7249_00487	A7249_00894	A7249_00822	A7249_00818	A7249_00285	A7249_00816	A7249_00821		A7249_00667	A7249_00733		A7249_00778	A7249_00010
Chlamydia trachomatis A2497		CTR_2631	CTR_5541	CTR_7661		CTR_0371		CTR_2651	CTR_7431	CTR_2661		CTR_7681	CTR_7641							CTR_7611	CTR_7131	CTR_6421		CTR_4571	CTR_8381	CTR_7661	CTR_7621	CTR_2641	CTR_7601	CTR_7651		CTR_6281	CTR_6861		CTR_7301	CTR_0091
Chlamydia trachomatis C/TW-3		CTW3_01450	CTW3_03055	CTW3_04280		CTW3_00205		CTW3_01460	CTW3_04110	CTW3_01465		CTW3_04290	CTW3_04270							CTW3_04255	CTW3_03960	CTW3_03525		CTW3_02515	CTW3_04670	CTW3_04280	CTW3_04260	CTW3_01455	CTW3_04250	CTW3_04275		CTW3_03435	CTW3_03805		CTW3_04045	CTW3_00055
Chlamydia trachomatis chxRP1H1		Ga0198600_01_299337_300056	Ga0198600_01_619891_621204	Ga0198600_01_894814_897222		Ga0198600_01_42865_43209		Ga0198600_01_301805_303748	Ga0198600_01_850833_853232	Ga0198600_01_303735_304022		Ga0198600_01_897836_898453	Ga0198600_01_892682_893839							Ga0198600_01_889723_890670	Ga0198600_01_818215_819315	Ga0198600_01_726647_727657		Ga0198600_01_529366_530700	Ga0198600_01_980084_980959	Ga0198600_01_894814_897222	Ga0198600_01_890682_891932	Ga0198600_01_300031_301482	Ga0198600_01_888162_889514	Ga0198600_01_893748_894806		Ga0198600_01_710527_712137	Ga0198600_01_780525_783767		Ga0198600_01_836649_837788	Ga0198600_01_9373_9804
Chlamydia trachomatis chxRP4D10		Ga0198587_01_299331_300050	Ga0198587_01_619885_621198	Ga0198587_01_894808_897216		Ga0198587_01_42865_43209		Ga0198587_01_301799_303742	Ga0198587_01_850827_853226	Ga0198587_01_303729_304016		Ga0198587_01_897830_898636	Ga0198587_01_892676_893833							Ga0198587_01_889717_890664	Ga0198587_01_818209_819309	Ga0198587_01_726641_727651		Ga0198587_01_529360_530694	Ga0198587_01_980077_980952	Ga0198587_01_894808_897216	Ga0198587_01_890676_891926	Ga0198587_01_300025_301476	Ga0198587_01_888156_889508	Ga0198587_01_893742_894800		Ga0198587_01_710521_712131	Ga0198587_01_780519_783761		Ga0198587_01_836643_837782	Ga0198587_01_9373_9804
Chlamydia trachomatis chxRP4F1		Ga0198791_01_299355_300074	Ga0198791_01_619909_621222	Ga0198791_01_894832_897240		Ga0198791_01_42865_43209		Ga0198791_01_301823_303766	Ga0198791_01_850851_853250	Ga0198791_01_303753_304040		Ga0198791_01_897854_898471	Ga0198791_01_892700_893857							Ga0198791_01_889738_890688	Ga0198791_01_818233_819333	Ga0198791_01_726665_727675		Ga0198791_01_529384_530718	Ga0198791_01_980101_980976	Ga0198791_01_894832_897240	Ga0198791_01_890700_891950	Ga0198791_01_300049_301500	Ga0198791_01_888180_889532	Ga0198791_01_893766_894824		Ga0198791_01_710545_712155	Ga0198791_01_780543_783785		Ga0198791_01_836667_837806	Ga0198791_01_9373_9804
Chlamydia trachomatis D/13-96		Ga0111822_11924	Ga0111822_11617	Ga0111822_11384		Ga0111822_11220		Ga0111822_11922	Ga0111822_11417	Ga0111822_11921		Ga0111822_11382	Ga0111822_11386							Ga0111822_11389	Ga0111822_11447	Ga0111822_11525		Ga0111822_11720	Ga0111822_11309	Ga0111822_11384	Ga0111822_11388	Ga0111822_11923	Ga0111822_11390	Ga0111822_11385		Ga0111822_11541	Ga0111822_11475		Ga0111822_11430	Ga0111822_11251
Chlamydia trachomatis D/14-96		Ga0111763_11923	Ga0111763_11616	Ga0111763_11382		Ga0111763_11221		Ga0111763_11921	Ga0111763_11415	Ga0111763_11920		Ga0111763_11380	Ga0111763_11384							Ga0111763_11387	Ga0111763_11445	Ga0111763_11524		Ga0111763_11720	Ga0111763_11309	Ga0111763_11382	Ga0111763_11386	Ga0111763_11922	Ga0111763_11388	Ga0111763_11383		Ga0111763_11540	Ga0111763_11473		Ga0111763_11428	Ga0111763_11251
Chlamydia trachomatis D/CS637/11		Ga0114081_01_300091_300810	Ga0114081_01_620795_622108	Ga0114081_01_895719_898127		Ga0114081_01_43465_43809		Ga0114081_01_302559_304502	Ga0114081_01_851736_854135	Ga0114081_01_304489_304776		Ga0114081_01_898741_899547	Ga0114081_01_893587_894744							Ga0114081_01_890565_891575	Ga0114081_01_819119_820219	Ga0114081_01_727559_728569		Ga0114081_01_530120_531454	Ga0114081_01_980988_981863	Ga0114081_01_895719_898127	Ga0114081_01_891587_892837	Ga0114081_01_300785_302236	Ga0114081_01_889067_890419	Ga0114081_01_894653_895711		Ga0114081_01_711439_713049	Ga0114081_01_781446_784688		Ga0114081_01_837552_838691	Ga0114081_01_9973_10404
Chlamydia trachomatis D/SotonD1		SOTOND1_00278	SOTOND1_00586	SOTOND1_00817		SOTOND1_00041		SOTOND1_00280	SOTOND1_00786	SOTOND1_00281		SOTOND1_00819	SOTOND1_00815							SOTOND1_00812	SOTOND1_00756	SOTOND1_00678		SOTOND1_00482	SOTOND1_00890	SOTOND1_00817	SOTOND1_00813	SOTOND1_00279	SOTOND1_00811	SOTOND1_00816		SOTOND1_00662	SOTOND1_00728		SOTOND1_00773	SOTOND1_00010
Chlamydia trachomatis D/SotonD5		SOTOND5_00277	SOTOND5_00584	SOTOND5_00815		SOTOND5_00040		SOTOND5_00279	SOTOND5_00784	SOTOND5_00280		SOTOND5_00817	SOTOND5_00813							SOTOND5_00810	SOTOND5_00754	SOTOND5_00676		SOTOND5_00480	SOTOND5_00887	SOTOND5_00815	SOTOND5_00811	SOTOND5_00278	SOTOND5_00809	SOTOND5_00814		SOTOND5_00660	SOTOND5_00726		SOTOND5_00771	SOTOND5_00010
Chlamydia trachomatis D-EC		CTDEC_0268	CTDEC_0551	CTDEC_0762		CTDEC_0038		CTDEC_0270	CTDEC_0739	CTDEC_0271		CTDEC_0764	CTDEC_0760							CTDEC_0757	CTDEC_0709	CTDEC_0638		CTDEC_0455	CTDEC_0831	CTDEC_0762	CTDEC_0758	CTDEC_0269	CTDEC_0756	CTDEC_0761		CTDEC_0624	CTDEC_0682		CTDEC_0726	CTDEC_0009
Chlamydia trachomatis D-LC		CTDLC_0268	CTDLC_0551	CTDLC_0762		CTDLC_0038		CTDLC_0270	CTDLC_0739	CTDLC_0271		CTDLC_0764	CTDLC_0760							CTDLC_0757	CTDLC_0709	CTDLC_0638		CTDLC_0455	CTDLC_0831	CTDLC_0762	CTDLC_0758	CTDLC_0269	CTDLC_0756	CTDLC_0761		CTDLC_0624	CTDLC_0682		CTDLC_0726	CTDLC_0009
Chlamydia trachomatis Ds2923		CtraD_010100001400	CtraD_010100002920	CtraD_010100004090		CtraD_010100000195		CtraD_010100001410	CtraD_010100003955	CtraD_010100001415		CtraD_010100004100	CtraD_010100004080							CtraD_010100004065	CtraD_010100003795	CtraD_010100003400		CtraD_010100002410	CtraD_010100004475	CtraD_010100004090	CtraD_010100004070	CtraD_010100001405	CtraD_010100004060	CtraD_010100004085		CtraD_010100003320	CtraD_010100003650		CtraD_010100003890	CtraD_010100000050
Chlamydia trachomatis E/12-94		Ga0111786_11929	Ga0111786_11620	Ga0111786_11385		Ga0111786_11221		Ga0111786_11927	Ga0111786_11418	Ga0111786_11926		Ga0111786_11383	Ga0111786_11387							Ga0111786_11390	Ga0111786_11448	Ga0111786_11526		Ga0111786_11723	Ga0111786_11310	Ga0111786_11385	Ga0111786_11389	Ga0111786_11928	Ga0111786_11391	Ga0111786_11386		Ga0111786_11544	Ga0111786_11476		Ga0111786_11431	Ga0111786_11252
Chlamydia trachomatis E/150		E150_01395	E150_02910	E150_04065		E150_00200		E150_01405	E150_03935	E150_01410		E150_04075	E150_04055							E150_04040	E150_03775	E150_03385		E150_02405	E150_04455	E150_04065	E150_04045	E150_01400	E150_04035	E150_04060		E150_03305	E150_03625		E150_03870	E150_00050
Chlamydia trachomatis E/Bour		BOUR_00280	BOUR_00588	BOUR_00819		BOUR_00041		BOUR_00282	BOUR_00788	BOUR_00283		BOUR_00821	BOUR_00817							BOUR_00814	BOUR_00758	BOUR_00680		BOUR_00485	BOUR_00892	BOUR_00819	BOUR_00815	BOUR_00281	BOUR_00813	BOUR_00818		BOUR_00664	BOUR_00730		BOUR_00775	BOUR_00010
Chlamydia trachomatis E/C599		EC599_2741	EC599_5721	EC599_8021		EC599_0391		EC599_2761	EC599_7691	EC599_2771		EC599_8041	EC599_8001							EC599_7971	EC599_7391	EC599_6621		EC599_4701	EC599_8751	EC599_8021	EC599_7981	EC599_2751	EC599_7961	EC599_8011		EC599_6461	EC599_7111		EC599_7561	EC599_0091
Chlamydia trachomatis E/CS1025/11		Ga0133408_12925	Ga0133408_12617	Ga0133408_12384		Ga0133408_12221		Ga0133408_12923	Ga0133408_12417	Ga0133408_12922		Ga0133408_12382	Ga0133408_12386							Ga0133408_12389	Ga0133408_12447	Ga0133408_12525		Ga0133408_12720	Ga0133408_12310	Ga0133408_12384	Ga0133408_12388	Ga0133408_12924	Ga0133408_12390	Ga0133408_12385		Ga0133408_12541	Ga0133408_12475		Ga0133408_12430	Ga0133408_12252
Chlamydia trachomatis E/SotonE4		SOTONE4_00276	SOTONE4_00583	SOTONE4_00814		SOTONE4_00041		SOTONE4_00278	SOTONE4_00783	SOTONE4_00279		SOTONE4_00816	SOTONE4_00812							SOTONE4_00809	SOTONE4_00753	SOTONE4_00675		SOTONE4_00480	SOTONE4_00888	SOTONE4_00814	SOTONE4_00810	SOTONE4_00277	SOTONE4_00808	SOTONE4_00813		SOTONE4_00659	SOTONE4_00725		SOTONE4_00770	SOTONE4_00010
Chlamydia trachomatis E/SotonE8		SOTONE8_00282	SOTONE8_00589	SOTONE8_00821		SOTONE8_00041		SOTONE8_00284	SOTONE8_00790	SOTONE8_00285		SOTONE8_00823	SOTONE8_00819							SOTONE8_00816	SOTONE8_00760	SOTONE8_00681		SOTONE8_00486	SOTONE8_00892	SOTONE8_00821	SOTONE8_00817	SOTONE8_00283	SOTONE8_00815	SOTONE8_00820		SOTONE8_00665	SOTONE8_00731		SOTONE8_00777	SOTONE8_00010
Chlamydia trachomatis E-103		Ga0175912_11928	Ga0175912_11620	Ga0175912_11386		Ga0175912_11221		Ga0175912_11926	Ga0175912_11419	Ga0175912_11925		Ga0175912_11384	Ga0175912_11388							Ga0175912_11391	Ga0175912_11449	Ga0175912_11528		Ga0175912_11723	Ga0175912_11311	Ga0175912_11386	Ga0175912_11390	Ga0175912_11927	Ga0175912_11392	Ga0175912_11387		Ga0175912_11544	Ga0175912_11477		Ga0175912_11432	Ga0175912_11253
Chlamydia trachomatis E-32931		Ga0175102_12933	Ga0175102_12625	Ga0175102_12391		Ga0175102_12227		Ga0175102_12931	Ga0175102_12424	Ga0175102_12930		Ga0175102_12389	Ga0175102_12393							Ga0175102_12396	Ga0175102_12454	Ga0175102_12533		Ga0175102_12728	Ga0175102_12316	Ga0175102_12391	Ga0175102_12395	Ga0175102_12932	Ga0175102_12397	Ga0175102_12392		Ga0175102_12549	Ga0175102_12482		Ga0175102_12437	Ga0175102_12258
Chlamydia trachomatis E-8873		Ga0175917_12928	Ga0175917_12620	Ga0175917_12386		Ga0175917_12222		Ga0175917_12926	Ga0175917_12419	Ga0175917_12925		Ga0175917_12384	Ga0175917_12388							Ga0175917_12391	Ga0175917_12449	Ga0175917_12528		Ga0175917_12723	Ga0175917_12311	Ga0175917_12386	Ga0175917_12390	Ga0175917_12927	Ga0175917_12392	Ga0175917_12387		Ga0175917_12544	Ga0175917_12477		Ga0175917_12432	Ga0175917_12253
Chlamydia trachomatis E-DK-20		Ga0175596_12933	Ga0175596_12625	Ga0175596_12391		Ga0175596_12227		Ga0175596_12931	Ga0175596_12424	Ga0175596_12930		Ga0175596_12389	Ga0175596_12393							Ga0175596_12396	Ga0175596_12454	Ga0175596_12533		Ga0175596_12728	Ga0175596_12316	Ga0175596_12391	Ga0175596_12395	Ga0175596_12932	Ga0175596_12397	Ga0175596_12392		Ga0175596_12549	Ga0175596_12482		Ga0175596_12437	Ga0175596_12258
Chlamydia trachomatis F/2-93		Ga0111772_11923	Ga0111772_11617	Ga0111772_11382		Ga0111772_11220		Ga0111772_11921	Ga0111772_11415	Ga0111772_11920		Ga0111772_11380	Ga0111772_11384							Ga0111772_11387	Ga0111772_11445	Ga0111772_11524		Ga0111772_11720	Ga0111772_11308	Ga0111772_11382	Ga0111772_11386	Ga0111772_11922	Ga0111772_11388	Ga0111772_11383		Ga0111772_11540	Ga0111772_11473		Ga0111772_11428	Ga0111772_11251
Chlamydia trachomatis F/CS847/08		Ga0133512_12925	Ga0133512_12618	Ga0133512_12384		Ga0133512_12221		Ga0133512_12923	Ga0133512_12417	Ga0133512_12922		Ga0133512_12382	Ga0133512_12386							Ga0133512_12389	Ga0133512_12447	Ga0133512_12526		Ga0133512_12721	Ga0133512_12310	Ga0133512_12384	Ga0133512_12388	Ga0133512_12924	Ga0133512_12390	Ga0133512_12385		Ga0133512_12542	Ga0133512_12475		Ga0133512_12430	Ga0133512_12252
Chlamydia trachomatis F/SotonF3		SOTONF3_00277	SOTONF3_00583	SOTONF3_00815		SOTONF3_00041		SOTONF3_00279	SOTONF3_00784	SOTONF3_00280		SOTONF3_00817	SOTONF3_00813							SOTONF3_00810	SOTONF3_00754	SOTONF3_00675		SOTONF3_00480	SOTONF3_00888	SOTONF3_00815	SOTONF3_00811	SOTONF3_00278	SOTONF3_00809	SOTONF3_00814		SOTONF3_00659	SOTONF3_00726		SOTONF3_00771	SOTONF3_00010
Chlamydia trachomatis F/SW4		FSW4_2701	FSW4_5611	FSW4_7741		FSW4_0381		FSW4_2721	FSW4_7511	FSW4_2731		FSW4_7761	FSW4_7721							FSW4_7691	FSW4_7211	FSW4_6491		FSW4_4641	FSW4_8461	FSW4_7741	FSW4_7701	FSW4_2711	FSW4_7681	FSW4_7731		FSW4_6351	FSW4_6941		FSW4_7381	FSW4_0091
Chlamydia trachomatis F/SWFPminus		Ga0038970_11924	Ga0038970_11617	Ga0038970_11383		Ga0038970_11220		Ga0038970_11922	Ga0038970_11416	Ga0038970_11921		Ga0038970_11381	Ga0038970_11385							Ga0038970_11388	Ga0038970_11446	Ga0038970_11525		Ga0038970_11720	Ga0038970_11309	Ga0038970_11383	Ga0038970_11387	Ga0038970_11923	Ga0038970_11389	Ga0038970_11384		Ga0038970_11541	Ga0038970_11474		Ga0038970_11429	Ga0038970_11251
Chlamydia trachomatis F-6068		Ga0175918_11928	Ga0175918_11620	Ga0175918_11386		Ga0175918_11222		Ga0175918_11926	Ga0175918_11419	Ga0175918_11925		Ga0175918_11384	Ga0175918_11388							Ga0175918_11391	Ga0175918_11449	Ga0175918_11528		Ga0175918_11723	Ga0175918_11311	Ga0175918_11386	Ga0175918_11390	Ga0175918_11927	Ga0175918_11392	Ga0175918_11387		Ga0175918_11544	Ga0175918_11477		Ga0175918_11432	Ga0175918_11253
Chlamydia trachomatis G/11074		G11074_01375	G11074_02890	G11074_04035		G11074_00200		G11074_01385	G11074_03905	G11074_01390		G11074_04045	G11074_04025							G11074_04010	G11074_03750	G11074_03355		G11074_02380	G11074_04410	G11074_04035	G11074_04015	G11074_01380	G11074_04005	G11074_04030		G11074_03275	G11074_03605		G11074_03840	G11074_00050
Chlamydia trachomatis G/9301		CTG9301_01375	CTG9301_02895	CTG9301_04050		CTG9301_00200		CTG9301_01385	CTG9301_03920	CTG9301_01390		CTG9301_04060	CTG9301_04040							CTG9301_04025	CTG9301_03765	CTG9301_03370		CTG9301_02385	CTG9301_04425	CTG9301_04050	CTG9301_04030	CTG9301_01380	CTG9301_04020	CTG9301_04045		CTG9301_03290	CTG9301_03620		CTG9301_03855	CTG9301_00050
Chlamydia trachomatis G/SotonG1		SOTONG1_00277	SOTONG1_00584	SOTONG1_00816		SOTONG1_00040		SOTONG1_00279	SOTONG1_00785	SOTONG1_00280		SOTONG1_00818	SOTONG1_00814							SOTONG1_00811	SOTONG1_00755	SOTONG1_00676		SOTONG1_00481	SOTONG1_00888	SOTONG1_00816	SOTONG1_00812	SOTONG1_00278	SOTONG1_00810	SOTONG1_00815		SOTONG1_00660	SOTONG1_00727		SOTONG1_00772	SOTONG1_00010
Chlamydia trachomatis Ia/20-97		Ga0111754_11925	Ga0111754_11617	Ga0111754_11383		Ga0111754_11222		Ga0111754_11923	Ga0111754_11416	Ga0111754_11922		Ga0111754_11381	Ga0111754_11385							Ga0111754_11388	Ga0111754_11446	Ga0111754_11524		Ga0111754_11721	Ga0111754_11310	Ga0111754_11383	Ga0111754_11387	Ga0111754_11924	Ga0111754_11389	Ga0111754_11384		Ga0111754_11540	Ga0111754_11474		Ga0111754_11429	Ga0111754_11252
Chlamydia trachomatis Ia/CS190/96		Ga0133336_11921	Ga0133336_11614	Ga0133336_11381		Ga0133336_11220		Ga0133336_11919	Ga0133336_11414	Ga0133336_11918		Ga0133336_11379	Ga0133336_11383							Ga0133336_11386	Ga0133336_11444	Ga0133336_11522		Ga0133336_11718	Ga0133336_11308	Ga0133336_11381	Ga0133336_11385	Ga0133336_11920	Ga0133336_11387	Ga0133336_11382		Ga0133336_11538	Ga0133336_11472		Ga0133336_11427	Ga0133336_11250
Chlamydia trachomatis Ia/SotonIa1		SOTONIA1_00279	SOTONIA1_00586	SOTONIA1_00818		SOTONIA1_00040		SOTONIA1_00281	SOTONIA1_00787	SOTONIA1_00282		SOTONIA1_00820	SOTONIA1_00816							SOTONIA1_00813	SOTONIA1_00757	SOTONIA1_00679		SOTONIA1_00482	SOTONIA1_00890	SOTONIA1_00818	SOTONIA1_00814	SOTONIA1_00280	SOTONIA1_00812	SOTONIA1_00817		SOTONIA1_00663	SOTONIA1_00729		SOTONIA1_00774	SOTONIA1_00010
Chlamydia trachomatis Ia/SotonIa3		SOTONIA3_00279	SOTONIA3_00586	SOTONIA3_00818		SOTONIA3_00040		SOTONIA3_00281	SOTONIA3_00787	SOTONIA3_00282		SOTONIA3_00820	SOTONIA3_00816							SOTONIA3_00813	SOTONIA3_00757	SOTONIA3_00679		SOTONIA3_00482	SOTONIA3_00890	SOTONIA3_00818	SOTONIA3_00814	SOTONIA3_00280	SOTONIA3_00812	SOTONIA3_00817		SOTONIA3_00663	SOTONIA3_00729		SOTONIA3_00774	SOTONIA3_00010
Chlamydia trachomatis IU824		Ga0046389_00929	Ga0046389_00621	Ga0046389_00386		Ga0046389_00222		Ga0046389_00927	Ga0046389_00420	Ga0046389_00926		Ga0046389_00384	Ga0046389_00388							Ga0046389_00391	Ga0046389_00451	Ga0046389_00529		Ga0046389_00724	Ga0046389_00311	Ga0046389_00386	Ga0046389_00390	Ga0046389_00928	Ga0046389_00392	Ga0046389_00387		Ga0046389_00545	Ga0046389_00479		Ga0046389_00433	Ga0046389_00253
Chlamydia trachomatis J/27-97		Ga0111824_11933	Ga0111824_11626	Ga0111824_11388		Ga0111824_11223		Ga0111824_11931	Ga0111824_11421	Ga0111824_11930		Ga0111824_11386	Ga0111824_11390							Ga0111824_11393	Ga0111824_11451	Ga0111824_11531		Ga0111824_11729	Ga0111824_11314	Ga0111824_11388	Ga0111824_11392	Ga0111824_11932	Ga0111824_11394	Ga0111824_11389		Ga0111824_11548	Ga0111824_11480		Ga0111824_11434	Ga0111824_11254
Chlamydia trachomatis J/31-98		Ga0111758_11925	Ga0111758_11617	Ga0111758_11384		Ga0111758_11222		Ga0111758_11923	Ga0111758_11417	Ga0111758_11922		Ga0111758_11382	Ga0111758_11386							Ga0111758_11389	Ga0111758_11447	Ga0111758_11525		Ga0111758_11721	Ga0111758_11311	Ga0111758_11384	Ga0111758_11388	Ga0111758_11924	Ga0111758_11390	Ga0111758_11385		Ga0111758_11541	Ga0111758_11475		Ga0111758_11430	Ga0111758_11252
Chlamydia trachomatis J6276tet1		CTJTET1_01390	CTJTET1_02920	CTJTET1_04235		CTJTET1_00200		CTJTET1_01400	CTJTET1_03950	CTJTET1_01405		CTJTET1_04245	CTJTET1_04225							CTJTET1_04210	CTJTET1_03795	CTJTET1_03395		CTJTET1_02400	CTJTET1_04610	CTJTET1_04235	CTJTET1_04215	CTJTET1_01395	CTJTET1_04205	CTJTET1_04230		CTJTET1_03315	CTJTET1_03645		CTJTET1_03885	CTJTET1_00050
Chlamydia trachomatis K/SotonK1		SOTONK1_00277	SOTONK1_00583	SOTONK1_00815		SOTONK1_00040		SOTONK1_00279	SOTONK1_00784	SOTONK1_00280		SOTONK1_00817	SOTONK1_00813							SOTONK1_00810	SOTONK1_00754	SOTONK1_00676		SOTONK1_00479	SOTONK1_00887	SOTONK1_00815	SOTONK1_00811	SOTONK1_00278	SOTONK1_00809	SOTONK1_00814		SOTONK1_00660	SOTONK1_00726		SOTONK1_00771	SOTONK1_00010
Chlamydia trachomatis L1/115		L1115_00274	L1115_00579	L1115_00811		L1115_00040		L1115_00276	L1115_00780	L1115_00277		L1115_00813	L1115_00809							L1115_00806	L1115_00750	L1115_00671		L1115_00475	L1115_00884	L1115_00811	L1115_00807	L1115_00275	L1115_00805	L1115_00810		L1115_00655	L1115_00722		L1115_00767	L1115_00010
Chlamydia trachomatis L1/1322/p2		L11322_00274	L11322_00579	L11322_00811		L11322_00040		L11322_00276	L11322_00780	L11322_00277		L11322_00813	L11322_00809							L11322_00806	L11322_00750	L11322_00671		L11322_00475	L11322_00884	L11322_00811	L11322_00807	L11322_00275	L11322_00805	L11322_00810		L11322_00655	L11322_00722		L11322_00767	L11322_00010
Chlamydia trachomatis L1/224		L1224_00273	L1224_00579	L1224_00811		L1224_00040		L1224_00275	L1224_00780	L1224_00276		L1224_00813	L1224_00809							L1224_00806	L1224_00750	L1224_00671		L1224_00475	L1224_00885	L1224_00811	L1224_00807	L1224_00274	L1224_00805	L1224_00810		L1224_00655	L1224_00722		L1224_00767	L1224_00010
Chlamydia trachomatis L2/25667R		L225667R_00274	L225667R_00581	L225667R_00812		L225667R_00040		L225667R_00276	L225667R_00781	L225667R_00277		L225667R_00814	L225667R_00810							L225667R_00807	L225667R_00751	L225667R_00673		L225667R_00477	L225667R_00885	L225667R_00812	L225667R_00808	L225667R_00275	L225667R_00806	L225667R_00811		L225667R_00657	L225667R_00723		L225667R_00768	L225667R_00010
Chlamydia trachomatis L2/434/Bu(f)		CTLFINAL_02730	CTLFINAL_04245	CTLFINAL_00705		CTLFINAL_01545		CTLFINAL_02740	CTLFINAL_00575	CTLFINAL_02745		CTLFINAL_00715	CTLFINAL_00695							CTLFINAL_00680	CTLFINAL_00415	CTLFINAL_00030		CTLFINAL_03735	CTLFINAL_01090	CTLFINAL_00705	CTLFINAL_00685	CTLFINAL_02735	CTLFINAL_00675	CTLFINAL_00700		CTLFINAL_04640	CTLFINAL_00270		CTLFINAL_00510	CTLFINAL_01400
Chlamydia trachomatis L2b/795		L2B795_00274	L2B795_00579	L2B795_00810		L2B795_00040		L2B795_00276	L2B795_00779	L2B795_00277		L2B795_00812	L2B795_00808							L2B795_00805	L2B795_00749	L2B795_00671		L2B795_00475	L2B795_00884	L2B795_00810	L2B795_00806	L2B795_00275	L2B795_00804	L2B795_00809		L2B795_00655	L2B795_00721		L2B795_00766	L2B795_00010
Chlamydia trachomatis L2b/8200/07		L2B8200_00273	L2B8200_00578	L2B8200_00810		L2B8200_00040		L2B8200_00275	L2B8200_00779	L2B8200_00276		L2B8200_00812	L2B8200_00808							L2B8200_00805	L2B8200_00749	L2B8200_00670		L2B8200_00474	L2B8200_00884	L2B8200_00810	L2B8200_00806	L2B8200_00274	L2B8200_00804	L2B8200_00809		L2B8200_00654	L2B8200_00721		L2B8200_00766	L2B8200_00010
Chlamydia trachomatis L2b/Ams1		L2BAMS1_00273	L2BAMS1_00578	L2BAMS1_00810		L2BAMS1_00040		L2BAMS1_00275	L2BAMS1_00779	L2BAMS1_00276		L2BAMS1_00812	L2BAMS1_00808							L2BAMS1_00805	L2BAMS1_00749	L2BAMS1_00670		L2BAMS1_00474	L2BAMS1_00884	L2BAMS1_00810	L2BAMS1_00806	L2BAMS1_00274	L2BAMS1_00804	L2BAMS1_00809		L2BAMS1_00654	L2BAMS1_00721		L2BAMS1_00766	L2BAMS1_00010
Chlamydia trachomatis L2b/Ams3		L2BAMS3_00273	L2BAMS3_00578	L2BAMS3_00810		L2BAMS3_00040		L2BAMS3_00275	L2BAMS3_00779	L2BAMS3_00276		L2BAMS3_00812	L2BAMS3_00808							L2BAMS3_00805	L2BAMS3_00749	L2BAMS3_00670		L2BAMS3_00474	L2BAMS3_00884	L2BAMS3_00810	L2BAMS3_00806	L2BAMS3_00274	L2BAMS3_00804	L2BAMS3_00809		L2BAMS3_00654	L2BAMS3_00721		L2BAMS3_00766	L2BAMS3_00010
Chlamydia trachomatis L2b/Canada1		L2BCAN1_00275	L2BCAN1_00579	L2BCAN1_00812		L2BCAN1_00040		L2BCAN1_00277	L2BCAN1_00781	L2BCAN1_00278		L2BCAN1_00814	L2BCAN1_00810							L2BCAN1_00807	L2BCAN1_00751	L2BCAN1_00672		L2BCAN1_00475	L2BCAN1_00886	L2BCAN1_00812	L2BCAN1_00808	L2BCAN1_00276	L2BCAN1_00806	L2BCAN1_00811		L2BCAN1_00655	L2BCAN1_00723		L2BCAN1_00768	L2BCAN1_00010
Chlamydia trachomatis L2b/CS19/08		Ga0078266_12920	Ga0078266_12614	Ga0078266_12381		Ga0078266_12217		Ga0078266_12918	Ga0078266_12414	Ga0078266_12917		Ga0078266_12379	Ga0078266_12383							Ga0078266_12386	Ga0078266_12444	Ga0078266_12522		Ga0078266_12718	Ga0078266_12307	Ga0078266_12381	Ga0078266_12385	Ga0078266_12919	Ga0078266_12387	Ga0078266_12382		Ga0078266_12538	Ga0078266_12472		Ga0078266_12427	Ga0078266_12247
Chlamydia trachomatis L2b/CS784/08		Ga0078271_11920	Ga0078271_11614	Ga0078271_11381		Ga0078271_11217		Ga0078271_11918	Ga0078271_11414	Ga0078271_11917		Ga0078271_11379	Ga0078271_11383							Ga0078271_11386	Ga0078271_11444	Ga0078271_11522		Ga0078271_11718	Ga0078271_11307	Ga0078271_11381	Ga0078271_11385	Ga0078271_11919	Ga0078271_11387	Ga0078271_11382		Ga0078271_11538	Ga0078271_11472		Ga0078271_11427	Ga0078271_11247
Chlamydia trachomatis L2b/CV204		L2BCV204_00273	L2BCV204_00578	L2BCV204_00810		L2BCV204_00040		L2BCV204_00275	L2BCV204_00779	L2BCV204_00276		L2BCV204_00812	L2BCV204_00808							L2BCV204_00805	L2BCV204_00749	L2BCV204_00670		L2BCV204_00474	L2BCV204_00884	L2BCV204_00810	L2BCV204_00806	L2BCV204_00274	L2BCV204_00804	L2BCV204_00809		L2BCV204_00654	L2BCV204_00721		L2BCV204_00766	L2BCV204_00010
Chlamydia trachomatis L2b/LST		L2BLST_00273	L2BLST_00578	L2BLST_00810		L2BLST_00040		L2BLST_00275	L2BLST_00779	L2BLST_00276		L2BLST_00812	L2BLST_00808							L2BLST_00805	L2BLST_00749	L2BLST_00670		L2BLST_00474	L2BLST_00884	L2BLST_00810	L2BLST_00806	L2BLST_00274	L2BLST_00804	L2BLST_00809		L2BLST_00654	L2BLST_00721		L2BLST_00766	L2BLST_00010
Chlamydia trachomatis L2b/UCH-2		L2BUCH2_00273	L2BUCH2_00578	L2BUCH2_00810		L2BUCH2_00040		L2BUCH2_00275	L2BUCH2_00779	L2BUCH2_00276		L2BUCH2_00812	L2BUCH2_00808							L2BUCH2_00805	L2BUCH2_00749	L2BUCH2_00670		L2BUCH2_00474	L2BUCH2_00884	L2BUCH2_00810	L2BUCH2_00806	L2BUCH2_00274	L2BUCH2_00804	L2BUCH2_00809		L2BUCH2_00654	L2BUCH2_00721		L2BUCH2_00766	L2BUCH2_00010
Chlamydia trachomatis L2c			CTL2C_717	CTL2C_47		CTL2C_779		CTL2C_769	CTL2C_584	CTL2C_302		CTL2C_496	CTL2C_918							CTL2C_478	CTL2C_246	CTL2C_781		CTL2C_863	CTL2C_450	CTL2C_47	CTL2C_873	CTL2C_756	CTL2C_278	CTL2C_84		CTL2C_546	CTL2C_319		CTL2C_489	CTL2C_230
Chlamydia trachomatis L2tet1		Ga0248308_01_655563_656342	Ga0248308_01_976415_977728	Ga0248308_01_212577_214988		Ga0248308_01_402822_403166		Ga0248308_01_658031_659974	Ga0248308_01_130786_133185	Ga0248308_01_659961_660248		Ga0248308_01_215602_216219	Ga0248308_01_210448_211605							Ga0248308_01_207489_208436	Ga0248308_01_98128_99228	Ga0248308_01_6522_7532		Ga0248308_01_885729_887063	Ga0248308_01_297787_298662	Ga0248308_01_212577_214988	Ga0248308_01_208448_209698	Ga0248308_01_656257_657708	Ga0248308_01_205928_207280	Ga0248308_01_211514_212572		Ga0248308_01_1067025_1068635	Ga0248308_01_60428_63670		Ga0248308_01_116602_117741	Ga0248308_01_369403_369834
Chlamydia trachomatis L3/404/LN		L3404_00273	L3404_00579	L3404_00810		L3404_00040		L3404_00275	L3404_00779	L3404_00276		L3404_00812	L3404_00808							L3404_00805	L3404_00749	L3404_00671		L3404_00475	L3404_00883	L3404_00810	L3404_00806	L3404_00274	L3404_00804	L3404_00809		L3404_00655	L3404_00721		L3404_00766	L3404_00010
Chlamydia trachomatis QH111L		Ga0175597_12918	Ga0175597_12609	Ga0175597_12390		Ga0175597_12229		Ga0175597_12916	Ga0175597_12409	Ga0175597_12915		Ga0175597_12388	Ga0175597_12392							Ga0175597_12395	Ga0175597_12439	Ga0175597_12518		Ga0175597_12713	Ga0175597_12316	Ga0175597_12390	Ga0175597_12394	Ga0175597_12917	Ga0175597_12396	Ga0175597_12391		Ga0175597_12534	Ga0175597_12467		Ga0175597_12422	Ga0175597_12259
Chlamydia trachomatis RC-F69		CTRC69_01400	CTRC69_02925	CTRC69_04070		CTRC69_00195		CTRC69_01410	CTRC69_03940	CTRC69_01415		CTRC69_04080	CTRC69_04060							CTRC69_04045	CTRC69_03780	CTRC69_03390		CTRC69_02420	CTRC69_04455	CTRC69_04070	CTRC69_04050	CTRC69_01405	CTRC69_04040	CTRC69_04065		CTRC69_03310	CTRC69_03635		CTRC69_03875	CTRC69_00050
Chlamydia trachomatis RC-Fs342		CTRC342_01420	CTRC342_02945	CTRC342_04265		CTRC342_00200		CTRC342_01430	CTRC342_03975	CTRC342_01435		CTRC342_04275	CTRC342_04255							CTRC342_04240	CTRC342_03815	CTRC342_03415		CTRC342_02430	CTRC342_04640	CTRC342_04265	CTRC342_04245	CTRC342_01425	CTRC342_04235	CTRC342_04260		CTRC342_03335	CTRC342_03665		CTRC342_03910	CTRC342_00055
Chlamydia trachomatis RC-J/971		CTRC971_01375	CTRC971_02900	CTRC971_04045		CTRC971_00200		CTRC971_01385	CTRC971_03915	CTRC971_01390		CTRC971_04055	CTRC971_04035							CTRC971_04020	CTRC971_03755	CTRC971_03375		CTRC971_02385	CTRC971_04435	CTRC971_04045	CTRC971_04025	CTRC971_01380	CTRC971_04015	CTRC971_04040		CTRC971_03295	CTRC971_03610		CTRC971_03850	CTRC971_00055
Chlamydia trachomatis RC-J953		CTRC953_01375	CTRC953_02890	CTRC953_04025		CTRC953_00195		CTRC953_01385	CTRC953_03895	CTRC953_01390		CTRC953_04035	CTRC953_04015							CTRC953_04000	CTRC953_03740	CTRC953_03355		CTRC953_02380	CTRC953_04410	CTRC953_04025	CTRC953_04005	CTRC953_01380	CTRC953_03995	CTRC953_04020		CTRC953_03275	CTRC953_03595		CTRC953_03830	CTRC953_00050
Chlamydia trachomatis RC-J966		CTRC966_01390	CTRC966_02900	CTRC966_04045		CTRC966_00200		CTRC966_01400	CTRC966_03910	CTRC966_01405		CTRC966_04055	CTRC966_04035							CTRC966_04020	CTRC966_03750	CTRC966_03365		CTRC966_02395	CTRC966_04435	CTRC966_04045	CTRC966_04025	CTRC966_01395	CTRC966_04015	CTRC966_04040		CTRC966_03285	CTRC966_03605		CTRC966_03845	CTRC966_00055
Chlamydia trachomatis RC-JL2s3		CTRC3_01400	CTRC3_02930	CTRC3_04080		CTRC3_00195		CTRC3_01410	CTRC3_03945	CTRC3_01415		CTRC3_04090	CTRC3_04070							CTRC3_04055	CTRC3_03785	CTRC3_03395		CTRC3_02420	CTRC3_04465	CTRC3_04080	CTRC3_04060	CTRC3_01405	CTRC3_04050	CTRC3_04075		CTRC3_03320	CTRC3_03640		CTRC3_03880	CTRC3_00050
Chlamydia trachomatis RC-Js122		CTRC122_01400	CTRC122_02925	CTRC122_04185		CTRC122_00195		CTRC122_01410	CTRC122_03955	CTRC122_01415		CTRC122_04195	CTRC122_04175							CTRC122_04160	CTRC122_03800	CTRC122_03400		CTRC122_02415	CTRC122_04560	CTRC122_04185	CTRC122_04165	CTRC122_01405	CTRC122_04155	CTRC122_04180		CTRC122_03320	CTRC122_03650		CTRC122_03890	CTRC122_00055
Chlamydia trachomatis RC-L2/55		CTRC55_01385	CTRC55_02900	CTRC55_04045		CTRC55_00200		CTRC55_01395	CTRC55_03915	CTRC55_01400		CTRC55_04055	CTRC55_04035							CTRC55_04020	CTRC55_03755	CTRC55_03365		CTRC55_02395	CTRC55_04435	CTRC55_04045	CTRC55_04025	CTRC55_01390	CTRC55_04015	CTRC55_04040		CTRC55_03290	CTRC55_03610		CTRC55_03850	CTRC55_00055
Chlamydia trachomatis RC-L2s46		CTRC46_01380	CTRC46_02905	CTRC46_04050		CTRC46_00195		CTRC46_01390	CTRC46_03920	CTRC46_01395		CTRC46_04060	CTRC46_04040							CTRC46_04025	CTRC46_03755	CTRC46_03365		CTRC46_02395	CTRC46_04440	CTRC46_04050	CTRC46_04030	CTRC46_01385	CTRC46_04020	CTRC46_04045		CTRC46_03295	CTRC46_03610		CTRC46_03855	CTRC46_00055
Chlamydia trachomatis SB006930		Ga0175752_12939	Ga0175752_12628	Ga0175752_12394		Ga0175752_12229		Ga0175752_12937	Ga0175752_12427	Ga0175752_12936		Ga0175752_12392	Ga0175752_12396							Ga0175752_12399	Ga0175752_12457	Ga0175752_12535		Ga0175752_12732	Ga0175752_12319	Ga0175752_12394	Ga0175752_12398	Ga0175752_12938	Ga0175752_12400	Ga0175752_12395		Ga0175752_12551	Ga0175752_12485		Ga0175752_12440	Ga0175752_12260
Chlamydia trachomatis SB013321		Ga0175418_11940	Ga0175418_11629	Ga0175418_11395		Ga0175418_11229		Ga0175418_11938	Ga0175418_11428	Ga0175418_11937		Ga0175418_11393	Ga0175418_11397							Ga0175418_11400	Ga0175418_11458	Ga0175418_11536		Ga0175418_11733	Ga0175418_11320	Ga0175418_11395	Ga0175418_11399	Ga0175418_11939	Ga0175418_11401	Ga0175418_11396		Ga0175418_11552	Ga0175418_11486		Ga0175418_11441	Ga0175418_11260
Chlamydia trachomatis sv. A HAR-13		CTA_0290	CTA_0601	CTA_0832		CTA_0041		CTA_0292	CTA_0801	CTA_0293		CTA_0834	CTA_0830							CTA_0827	CTA_0771	CTA_0693		CTA_0497	CTA_0906	CTA_0832	CTA_0828	CTA_0291	CTA_0826	CTA_0831		CTA_0677	CTA_0743		CTA_0788	CTA_0010
Chlamydia trachomatis sv. B B/TZ1A828/OT		CTB_2631	CTB_5541	CTB_7671		CTB_0371		CTB_2651	CTB_7441	CTB_2661		CTB_7691	CTB_7651							CTB_7621	CTB_7141	CTB_6421		CTB_4571	CTB_8391	CTB_7671	CTB_7631	CTB_2641	CTB_7611	CTB_7661		CTB_6281	CTB_6871		CTB_7311	CTB_0091
Chlamydia trachomatis sv. B Jali20/OT		JALI_2631	JALI_5541	JALI_7671		JALI_0371		JALI_2651	JALI_7441	JALI_2661		JALI_7691	JALI_7651							JALI_7621	JALI_7141	JALI_6421		JALI_4571	JALI_8391	JALI_7671	JALI_7631	JALI_2641	JALI_7611	JALI_7661		JALI_6281	JALI_6871		JALI_7311	JALI_0091
Chlamydia trachomatis sv. D D/UW-3/CX		CT268	CT551	CT762		CT038		CT270	CT739	CT271		CT764	CT760							CT757	CT709	CT638		CT455	CT831	CT762	CT758	CT269	CT756	CT761		CT624	CT682		CT726	CT009
Chlamydia trachomatis sv. D- SQ29		Ga0263453_01_304645_305364	Ga0263453_01_625175_626488	Ga0263453_01_900158_902569		Ga0263453_01_42865_43209		Ga0263453_01_307113_309056	Ga0263453_01_856180_858579	Ga0263453_01_309043_309330		Ga0263453_01_903183_903989	Ga0263453_01_898029_899186							Ga0263453_01_895013_896023	Ga0263453_01_823521_824621	Ga0263453_01_731939_732949		Ga0263453_01_534884_536218	Ga0263453_01_985430_986305	Ga0263453_01_900158_902569	Ga0263453_01_896035_897285	Ga0263453_01_305339_306790	Ga0263453_01_893515_894867	Ga0263453_01_899095_900153		Ga0263453_01_715822_717432	Ga0263453_01_785831_789073		Ga0263453_01_841996_843135	Ga0263453_01_9374_9805
Chlamydia trachomatis sv. D- SQ32		Ga0261007_01_304645_305364	Ga0261007_01_625175_626488	Ga0261007_01_900158_902569		Ga0261007_01_42865_43209		Ga0261007_01_307113_309056	Ga0261007_01_856180_858579	Ga0261007_01_309043_309330		Ga0261007_01_903183_903989	Ga0261007_01_898029_899186							Ga0261007_01_895013_896023	Ga0261007_01_823521_824621	Ga0261007_01_731939_732949		Ga0261007_01_534884_536218	Ga0261007_01_985430_986305	Ga0261007_01_900158_902569	Ga0261007_01_896035_897285	Ga0261007_01_305339_306790	Ga0261007_01_893515_894867	Ga0261007_01_899095_900153		Ga0261007_01_715822_717432	Ga0261007_01_785831_789073		Ga0261007_01_841996_843135	Ga0261007_01_9374_9805
Chlamydia trachomatis sv. E Sweden2		SW2_2701	SW2_5611	SW2_7741		SW2_0381		SW2_2721	SW2_7511	SW2_2731		SW2_7761	SW2_7721							SW2_7691	SW2_7211	SW2_6491		SW2_4641	SW2_8461	SW2_7741	SW2_7701	SW2_2711	SW2_7681	SW2_7731		SW2_6351	SW2_6941		SW2_7381	SW2_0091
Chlamydia trachomatis sv. F 70		Ctra70_010100001410	Ctra70_010100002935	Ctra70_010100004110		Ctra70_010100000195		Ctra70_010100001420	Ctra70_010100003975	Ctra70_010100001425		Ctra70_010100004120	Ctra70_010100004100							Ctra70_010100004085	Ctra70_010100003815	Ctra70_010100003415		Ctra70_010100002425	Ctra70_010100004490	Ctra70_010100004110	Ctra70_010100004090	Ctra70_010100001415	Ctra70_010100004080	Ctra70_010100004105		Ctra70_010100003335	Ctra70_010100003665		Ctra70_010100003910	Ctra70_010100000050
Chlamydia trachomatis sv. F 70s		Ctra7_010100001420	Ctra7_010100002945	Ctra7_010100004105		Ctra7_010100000200		Ctra7_010100001430	Ctra7_010100003970	Ctra7_010100001435		Ctra7_010100004115	Ctra7_010100004095							Ctra7_010100004080	Ctra7_010100003810	Ctra7_010100003420		Ctra7_010100002435	Ctra7_010100004485	Ctra7_010100004105	Ctra7_010100004085	Ctra7_010100001425	Ctra7_010100004075	Ctra7_010100004100		Ctra7_010100003340	Ctra7_010100003665		Ctra7_010100003905	Ctra7_010100000055
Chlamydia trachomatis sv. G G/11222		G11222_01375	G11222_02895	G11222_04060		G11222_00200		G11222_01385	G11222_03930	G11222_01390		G11222_04070	G11222_04050							G11222_04035	G11222_03775	G11222_03375		G11222_02380	G11222_04445	G11222_04060	G11222_04040	G11222_01380	G11222_04030	G11222_04055		G11222_03295	G11222_03625		G11222_03865	G11222_00050
Chlamydia trachomatis sv. H SQ20		Ga0263455_01_305341_306060	Ga0263455_01_626045_627358	Ga0263455_01_900968_903376		Ga0263455_01_42865_43209		Ga0263455_01_307809_309752	Ga0263455_01_856987_859386	Ga0263455_01_309739_310026		Ga0263455_01_903990_904796	Ga0263455_01_898836_899993							Ga0263455_01_895814_896824	Ga0263455_01_824370_825470	Ga0263455_01_732780_733790		Ga0263455_01_535370_536704	Ga0263455_01_986238_987113	Ga0263455_01_900968_903376	Ga0263455_01_896836_898086	Ga0263455_01_306035_307486	Ga0263455_01_894316_895668	Ga0263455_01_899902_900960		Ga0263455_01_716660_718270	Ga0263455_01_786679_789921		Ga0263455_01_842803_843942	Ga0263455_01_9373_9804
Chlamydia trachomatis sv. H SQ24		Ga0263337_01_305342_306061	Ga0263337_01_626046_627359	Ga0263337_01_900976_903384		Ga0263337_01_42865_43209		Ga0263337_01_307810_309753	Ga0263337_01_856995_859394	Ga0263337_01_309740_310027		Ga0263337_01_903998_904804	Ga0263337_01_898844_900001							Ga0263337_01_895822_896832	Ga0263337_01_824378_825478	Ga0263337_01_732781_733791		Ga0263337_01_535371_536705	Ga0263337_01_986246_987121	Ga0263337_01_900976_903384	Ga0263337_01_896844_898094	Ga0263337_01_306036_307487	Ga0263337_01_894324_895676	Ga0263337_01_899910_900968		Ga0263337_01_716661_718271	Ga0263337_01_786687_789929		Ga0263337_01_842811_843950	Ga0263337_01_9373_9804
Chlamydia trachomatis sv. Ia SQ06		Ga0263842_01_299847_300566	Ga0263842_01_620483_621796	Ga0263842_01_895444_897852		Ga0263842_01_42863_43207		Ga0263842_01_302315_304258	Ga0263842_01_851462_853861	Ga0263842_01_304245_304532		Ga0263842_01_898466_899083	Ga0263842_01_893312_894469							Ga0263842_01_890350_891300	Ga0263842_01_818845_819945	Ga0263842_01_727249_728259		Ga0263842_01_529843_531177	Ga0263842_01_980709_981584	Ga0263842_01_895444_897852	Ga0263842_01_891312_892562	Ga0263842_01_300541_301992	Ga0263842_01_888792_890144	Ga0263842_01_894378_895436		Ga0263842_01_711129_712739	Ga0263842_01_781154_784396		Ga0263842_01_837278_838417	Ga0263842_01_9373_9804
Chlamydia trachomatis sv. Ia SQ07		Ga0264182_01_299846_300565	Ga0264182_01_620527_621840	Ga0264182_01_895488_897896		Ga0264182_01_42863_43207		Ga0264182_01_302314_304257	Ga0264182_01_851506_853905	Ga0264182_01_304244_304531		Ga0264182_01_898510_899127	Ga0264182_01_893356_894513							Ga0264182_01_890334_891344	Ga0264182_01_818889_819989	Ga0264182_01_727293_728303		Ga0264182_01_529845_531179	Ga0264182_01_980753_981628	Ga0264182_01_895488_897896	Ga0264182_01_891356_892606	Ga0264182_01_300540_301991	Ga0264182_01_888836_890188	Ga0264182_01_894422_895480		Ga0264182_01_711173_712783	Ga0264182_01_781198_784440		Ga0264182_01_837322_838461	Ga0264182_01_9373_9804
Chlamydia trachomatis sv. Ia SQ09		Ga0263456_01_299709_300488	Ga0263456_01_620066_621379	Ga0263456_01_895016_897427		Ga0263456_01_42863_43207		Ga0263456_01_302177_304120	Ga0263456_01_851038_853437	Ga0263456_01_304107_304394		Ga0263456_01_898041_898847	Ga0263456_01_892887_894044							Ga0263456_01_889865_890875	Ga0263456_01_818423_819523	Ga0263456_01_726838_727848		Ga0263456_01_529693_531027	Ga0263456_01_980281_981156	Ga0263456_01_895016_897427	Ga0263456_01_890887_892137	Ga0263456_01_300403_301854	Ga0263456_01_888367_889719	Ga0263456_01_893953_895011		Ga0263456_01_710718_712328	Ga0263456_01_780733_783975		Ga0263456_01_836855_837994	Ga0263456_01_9373_9804
Chlamydia trachomatis sv. Ia SQ10		Ga0263836_01_299708_300427	Ga0263836_01_620074_621387	Ga0263836_01_895024_897435		Ga0263836_01_42863_43207		Ga0263836_01_302176_304119	Ga0263836_01_851046_853445	Ga0263836_01_304106_304393		Ga0263836_01_898049_898855	Ga0263836_01_892895_894052							Ga0263836_01_889873_890883	Ga0263836_01_818431_819531	Ga0263836_01_726846_727856		Ga0263836_01_529701_531035	Ga0263836_01_980289_981164	Ga0263836_01_895024_897435	Ga0263836_01_890895_892145	Ga0263836_01_300402_301853	Ga0263836_01_888375_889727	Ga0263836_01_893961_895019		Ga0263836_01_710726_712336	Ga0263836_01_780741_783983		Ga0263836_01_836863_838002	Ga0263836_01_9373_9804
Chlamydia trachomatis sv. Ia SQ12		Ga0264165_01_299710_300429	Ga0264165_01_620076_621389	Ga0264165_01_895029_897437		Ga0264165_01_42863_43207		Ga0264165_01_302178_304121	Ga0264165_01_851048_853447	Ga0264165_01_304108_304395		Ga0264165_01_898051_898668	Ga0264165_01_892897_894054							Ga0264165_01_889938_890885	Ga0264165_01_818432_819532	Ga0264165_01_726847_727857		Ga0264165_01_529703_531037	Ga0264165_01_980291_981166	Ga0264165_01_895029_897437	Ga0264165_01_890897_892147	Ga0264165_01_300404_301855	Ga0264165_01_888377_889729	Ga0264165_01_893963_895021		Ga0264165_01_710727_712337	Ga0264165_01_780742_783984		Ga0264165_01_836864_838003	Ga0264165_01_9373_9804
Chlamydia trachomatis sv. Ia SQ14		Ga0263941_01_299709_300428	Ga0263941_01_620078_621391	Ga0263941_01_895030_897438		Ga0263941_01_42863_43207		Ga0263941_01_302177_304120	Ga0263941_01_851049_853448	Ga0263941_01_304107_304394		Ga0263941_01_898052_898669	Ga0263941_01_892898_894055							Ga0263941_01_889939_890886	Ga0263941_01_818434_819534	Ga0263941_01_726849_727859		Ga0263941_01_529705_531039	Ga0263941_01_980292_981167	Ga0263941_01_895030_897438	Ga0263941_01_890898_892148	Ga0263941_01_300403_301854	Ga0263941_01_888378_889730	Ga0263941_01_893988_895022		Ga0263941_01_710729_712339	Ga0263941_01_780744_783986		Ga0263941_01_836866_838005	Ga0263941_01_9373_9804
Chlamydia trachomatis sv. J 6276		Ctra62_010100001380	Ctra62_010100002890	Ctra62_010100004040		Ctra62_010100000200		Ctra62_010100001390	Ctra62_010100003910	Ctra62_010100001395		Ctra62_010100004050	Ctra62_010100004030							Ctra62_010100004015	Ctra62_010100003755	Ctra62_010100003365		Ctra62_010100002375	Ctra62_010100004415	Ctra62_010100004040	Ctra62_010100004020	Ctra62_010100001385	Ctra62_010100004010	Ctra62_010100004035		Ctra62_010100003285	Ctra62_010100003605		Ctra62_010100003845	Ctra62_010100000050
Chlamydia trachomatis sv. J 6276s		Ctra6_010100001375	Ctra6_010100002880	Ctra6_010100004035		Ctra6_010100000200		Ctra6_010100001385	Ctra6_010100003905	Ctra6_010100001390		Ctra6_010100004045	Ctra6_010100004025							Ctra6_010100004010	Ctra6_010100003750	Ctra6_010100003355		Ctra6_010100002370	Ctra6_010100004410	Ctra6_010100004035	Ctra6_010100004015	Ctra6_010100001380	Ctra6_010100004005	Ctra6_010100004030		Ctra6_010100003275	Ctra6_010100003605		Ctra6_010100003840	Ctra6_010100000050
Chlamydia trachomatis sv. J SQ01		Ga0263718_01_305761_306480	Ga0263718_01_626193_627506	Ga0263718_01_901129_903540		Ga0263718_01_42860_43204		Ga0263718_01_308229_310172	Ga0263718_01_857152_859551	Ga0263718_01_310159_310446		Ga0263718_01_904154_904960	Ga0263718_01_899000_900157							Ga0263718_01_895978_896988	Ga0263718_01_824537_825637	Ga0263718_01_732947_733957		Ga0263718_01_535816_537150	Ga0263718_01_986404_987279	Ga0263718_01_901129_903540	Ga0263718_01_897000_898250	Ga0263718_01_306455_307906	Ga0263718_01_894480_895832	Ga0263718_01_900066_901124		Ga0263718_01_716828_718438	Ga0263718_01_786846_790088		Ga0263718_01_842970_844109	Ga0263718_01_9371_9802
Chlamydia trachomatis sv. J SQ02		Ga0264160_01_305761_306480	Ga0264160_01_626193_627506	Ga0264160_01_901129_903540		Ga0264160_01_42860_43204		Ga0264160_01_308229_310172	Ga0264160_01_857152_859551	Ga0264160_01_310159_310446		Ga0264160_01_904154_904960	Ga0264160_01_899000_900157							Ga0264160_01_895978_896988	Ga0264160_01_824537_825637	Ga0264160_01_732947_733957		Ga0264160_01_535816_537150	Ga0264160_01_986404_987279	Ga0264160_01_901129_903540	Ga0264160_01_897000_898250	Ga0264160_01_306455_307906	Ga0264160_01_894480_895832	Ga0264160_01_900066_901124		Ga0264160_01_716828_718438	Ga0264160_01_786846_790088		Ga0264160_01_842970_844109	Ga0264160_01_9371_9802
Chlamydia trachomatis sv. J SQ05		Ga0264163_01_305761_306480	Ga0264163_01_626193_627506	Ga0264163_01_901129_903540		Ga0264163_01_42860_43204		Ga0264163_01_308229_310172	Ga0264163_01_857152_859551	Ga0264163_01_310159_310446		Ga0264163_01_904154_904960	Ga0264163_01_899000_900157							Ga0264163_01_895978_896988	Ga0264163_01_824537_825637	Ga0264163_01_732947_733957		Ga0264163_01_535816_537150	Ga0264163_01_986404_987279	Ga0264163_01_901129_903540	Ga0264163_01_897000_898250	Ga0264163_01_306455_307906	Ga0264163_01_894480_895832	Ga0264163_01_900066_901124		Ga0264163_01_716828_718438	Ga0264163_01_786846_790088		Ga0264163_01_842970_844109	Ga0264163_01_9371_9802
Chlamydia trachomatis sv. Ja SQ25		Ga0263833_01_299623_300342	Ga0263833_01_620615_621928	Ga0263833_01_895688_898099		Ga0263833_01_42865_43209		Ga0263833_01_302091_304034	Ga0263833_01_851710_854109	Ga0263833_01_304021_304308		Ga0263833_01_898713_899330	Ga0263833_01_893559_894716							Ga0263833_01_890606_891553	Ga0263833_01_819051_820151	Ga0263833_01_727454_728464		Ga0263833_01_529859_531193	Ga0263833_01_980960_981835	Ga0263833_01_895688_898099	Ga0263833_01_891565_892815	Ga0263833_01_300317_301768	Ga0263833_01_889045_890397	Ga0263833_01_894625_895683		Ga0263833_01_711261_712871	Ga0263833_01_781361_784603		Ga0263833_01_837526_838665	Ga0263833_01_9374_9805
Chlamydia trachomatis sv. Ja SQ28		Ga0263522_01_299623_300342	Ga0263522_01_620615_621928	Ga0263522_01_895663_898026		Ga0263522_01_42865_43209		Ga0263522_01_302091_304034	Ga0263522_01_851637_854036	Ga0263522_01_304021_304308		Ga0263522_01_898640_899200	Ga0263522_01_893486_894643							Ga0263522_01_890533_891480	Ga0263522_01_818978_820078	Ga0263522_01_727381_728391		Ga0263522_01_529859_531193	Ga0263522_01_980887_981762	Ga0263522_01_895663_898026	Ga0263522_01_891492_892742	Ga0263522_01_300317_301768	Ga0263522_01_888972_890324	Ga0263522_01_894552_895610		Ga0263522_01_711261_712871	Ga0263522_01_781288_784530		Ga0263522_01_837453_838592	Ga0263522_01_9374_9805
Chlamydia trachomatis sv. K SQ15		Ga0263460_01_305010_305729	Ga0263460_01_625799_627112	Ga0263460_01_900748_903159		Ga0263460_01_42865_43209		Ga0263460_01_307478_309421	Ga0263460_01_856769_859168	Ga0263460_01_309408_309695		Ga0263460_01_903773_904579	Ga0263460_01_898619_899776							Ga0263460_01_895657_896607	Ga0263460_01_824155_825255	Ga0263460_01_732566_733576		Ga0263460_01_535163_536497	Ga0263460_01_986014_986889	Ga0263460_01_900748_903159	Ga0263460_01_896619_897869	Ga0263460_01_305704_307155	Ga0263460_01_894099_895451	Ga0263460_01_899685_900743		Ga0263460_01_716447_718057	Ga0263460_01_786464_789706		Ga0263460_01_842587_843726	Ga0263460_01_9373_9804
Chlamydia trachomatis sv. K SQ19		Ga0263461_01_305009_305728	Ga0263461_01_625798_627111	Ga0263461_01_900795_903158		Ga0263461_01_42865_43209		Ga0263461_01_307477_309420	Ga0263461_01_856768_859167	Ga0263461_01_309407_309694		Ga0263461_01_903772_904578	Ga0263461_01_898618_899775							Ga0263461_01_895596_896606	Ga0263461_01_824154_825254	Ga0263461_01_732565_733575		Ga0263461_01_535162_536496	Ga0263461_01_986013_986888	Ga0263461_01_900795_903158	Ga0263461_01_896618_897868	Ga0263461_01_305703_307154	Ga0263461_01_894098_895450	Ga0263461_01_899684_900742		Ga0263461_01_716446_718056	Ga0263461_01_786463_789705		Ga0263461_01_842586_843725	Ga0263461_01_9373_9804
Chlamydia trachomatis sv. L2 434/BU		CTL0520	CTL0813	CTL0131		CTL0293		CTL0522	CTL0108	CTL0523		CTL0133	CTL0129							CTL0126	CTL0078	CTL0006		CTL0715	CTL0203	CTL0131	CTL0127	CTL0521	CTL0125	CTL0130		CTL0888	CTL0051		CTL0095	CTL0264
Chlamydia trachomatis sv. L2 L2b/UCH-1/proctitis		CTLon_0516	CTLon_0808	CTLon_0131		CTLon_0288		CTLon_0518	CTLon_0108	CTLon_0519		CTLon_0133	CTLon_0129							CTLon_0126	CTLon_0078	CTLon_0006		CTLon_0711	CTLon_0203	CTLon_0131	CTLon_0127	CTLon_0517	CTLon_0125	CTLon_0130		CTLon_0882	CTLon_0051		CTLon_0095	CTLon_0259
Chlamydia trachomatis sv. L2 tet9		Ga0399493_01_633506_634225	Ga0399493_01_954358_955671	Ga0399493_01_190520_192931		Ga0399493_01_380765_381109		Ga0399493_01_635974_637917	Ga0399493_01_130786_133185	Ga0399493_01_637904_638191		Ga0399493_01_193545_194351	Ga0399493_01_188391_189548							Ga0399493_01_185369_186379	Ga0399493_01_98128_99228	Ga0399493_01_6522_7532		Ga0399493_01_863672_865006	Ga0399493_01_275730_276605	Ga0399493_01_190520_192931	Ga0399493_01_186391_187641	Ga0399493_01_634200_635651	Ga0399493_01_183871_185223	Ga0399493_01_189457_190515		Ga0399493_01_1044968_1046578	Ga0399493_01_60428_63670		Ga0399493_01_116602_117741	Ga0399493_01_347346_347777
Chlamydia trachomatis sv. LGV2 434Bu 383/384 IGR::Tn		Ga0226246_01_617769_618488	Ga0226246_01_940041_941354	Ga0226246_01_174783_177194		Ga0226246_01_365028_365372		Ga0226246_01_620237_622180	Ga0226246_01_130774_133173	Ga0226246_01_622167_622454		Ga0226246_01_177808_178425	Ga0226246_01_172654_173811							Ga0226246_01_169692_170642	Ga0226246_01_98128_99228	Ga0226246_01_6522_7532		Ga0226246_01_849358_850692	Ga0226246_01_259993_260868	Ga0226246_01_174783_177194	Ga0226246_01_170654_171904	Ga0226246_01_618463_619914	Ga0226246_01_168134_169486	Ga0226246_01_173720_174778		Ga0226246_01_1030651_1032261	Ga0226246_01_60428_63670		Ga0226246_01_116602_117741	Ga0226246_01_331609_332040
Chlamydia trachomatis sv. LGV2 434Bu cdu1::Tn		Ga0226358_01_619192_619911	Ga0226358_01_940041_941354	Ga0226358_01_174783_177194		Ga0226358_01_366451_366795		Ga0226358_01_621660_623603	Ga0226358_01_130774_133173	Ga0226358_01_623590_623877		Ga0226358_01_177808_178425	Ga0226358_01_172654_173811							Ga0226358_01_169695_170642	Ga0226358_01_98128_99228	Ga0226358_01_6522_7532		Ga0226358_01_849358_850692	Ga0226358_01_259993_260868	Ga0226358_01_174783_177194	Ga0226358_01_170654_171904	Ga0226358_01_619886_621337	Ga0226358_01_168134_169486	Ga0226358_01_173720_174778		Ga0226358_01_1030651_1032261	Ga0226358_01_60428_63670		Ga0226358_01_116602_117741	Ga0226358_01_333032_333463

## Sheet: Table S5
Table S3 BuchneraA and BuchneraL Host Taxonomy
	Genome Name	Family	Subfamily	Tribe	Genus	Species
BuchneraA	Buchnera aphidicola (Aphis fabae) Afa-UT1	Aphididae	Aphidinae	Aphidini	Aphis	fabae
	Buchnera aphidicola (Aphis glycines) BAg	Aphididae	Aphidinae	Aphidini	Aphis	glycines
	Buchnera aphidicola (Aphis gossypii) Ago-UT1	Aphididae	Aphidinae	Aphidini	Aphis	gossypii
	Buchnera aphidicola (Diuraphis noxia)	Aphididae	Aphidinae	Macrosiphini	Diuraphis	noxia
	Buchnera aphidicola 5A	Aphididae	Aphidinae	Macrosiphini	Acyrthosiphon	pisum
	Buchnera aphidicola Aar	Aphididae	Aphidinae	Macrosiphini	Artemisaphis	artemisicola
	Buchnera aphidicola Acr	Aphididae	Aphidinae	Aphidini	Aphis	craccivora
	Buchnera aphidicola Ahe	Aphididae	Aphidinae	Aphidini	Aphis	helianthi
	Buchnera aphidicola Ak	Aphididae	Aphidinae	Macrosiphini	Acyrthosiphon	kondoi
	Buchnera aphidicola Ala	Aphididae	Aphidinae	Macrosiphini	Acyrthosiphon	lactucae
	Buchnera aphidicola Ana	Aphididae	Aphidinae	Aphidini	Aphis	nasturtii
	Buchnera aphidicola Ane	Aphididae	Aphidinae	Aphidini	Aphis	nerii
	Buchnera aphidicola APS	Aphididae	Aphidinae	Macrosiphini	Acyrthosiphon	pisum
	Buchnera aphidicola Bbr	Aphididae	Aphidinae	Macrosiphini	Brevicoryne	brassicae
	Buchnera aphidicola Bca	Aphididae	Aphidinae	Macrosiphini	Brachycaudus	cardui
	Buchnera aphidicola BTI	Aphididae	Aphidinae	Aphidini	Rhopalosiphum	maidis
	Buchnera aphidicola F009	Aphididae	Aphidinae	Macrosiphini	Myzus	persicae
	Buchnera aphidicola G002	Aphididae	Aphidinae	Macrosiphini	Myzus	persicae
	Buchnera aphidicola Hla	Aphididae	Aphidinae	Macrosiphini	Hyperomyzus	lactucae
	Buchnera aphidicola Hta	Aphididae	Aphidinae	Macrosiphini	Hyadaphis	tataricae
	Buchnera aphidicola JF99	Aphididae	Aphidinae	Macrosiphini	Acyrthosiphon	pisum
	Buchnera aphidicola LL01	Aphididae	Aphidinae	Macrosiphini	Acyrthosiphon	pisum
	Buchnera aphidicola LNK	Aphididae	Aphidinae	Aphidini	Schizaphis	graminum
	Buchnera aphidicola Lps	Aphididae	Aphidinae	Macrosiphini	Lipaphis	pseudobrassicae
	Buchnera aphidicola LSR1	Aphididae	Aphidinae	Macrosiphini	Acyrthosiphon	pisum
	Buchnera aphidicola LSU	Aphididae	Aphidinae	Aphidini	Melanaphis	sacchari
	Buchnera aphidicola Meu	Aphididae	Aphidinae	Macrosiphini	Macrosiphum	euphorbiae
	Buchnera aphidicola Mga	Aphididae	Aphidinae	Macrosiphini	Macrosiphum	gaurae
	Buchnera aphidicola Msa	Aphididae	Aphidinae	Macrosiphini	Macrosiphoniella	sanborni
	Buchnera aphidicola Mst	Aphididae	Aphidinae	Macrosiphini	Muscaphis	stroyani
	Buchnera aphidicola Rpa	Aphididae	Aphidinae	Aphidini	Rhopalosiphum	padi
	Buchnera aphidicola Sav	Aphididae	Aphidinae	Macrosiphini	Sitobion	avenae
	Buchnera aphidicola Sg	Aphididae	Aphidinae	Aphidini	Schizaphis	graminum
	Buchnera aphidicola TLW03	Aphididae	Aphidinae	Macrosiphini	Acyrthosiphon	pisum
	Buchnera aphidicola Tuc7	Aphididae	Aphidinae	Macrosiphini	Acyrthosiphon	pisum
	Buchnera aphidicola Ua	Aphididae	Aphidinae	Macrosiphini	Uroleucon	ambrosiae
	Buchnera aphidicola USDA	Aphididae	Aphidinae	Macrosiphini	Myzus	persicae
	Buchnera aphidicola W106	Aphididae	Aphidinae	Macrosiphini	Myzus	persicae
BuchneraL	Buchnera aphidicola (Cinara pseudotaxifoliae) BCipseudotaxifoliae/3056	Aphididae	Lachninae	Lachnini	Cinara	pseudotaxifoliae
	Buchnera aphidicola Bciconfinis 2801	Aphididae	Lachninae	Lachnini	Cinara	confinis
	Buchnera aphidicola Bcifornacula 2912	Aphididae	Lachninae	Lachnini	Cinara	fornacula
	Buchnera aphidicola BTs Pazieg	Aphididae	Lachninae	Lachnini	Tuberolachnus	salignus
	Buchnera aphidicola BuCicuneomaculata/2628	Aphididae	Lachninae	Lachnini	Cinara	cuneomaculata
	Buchnera aphidicola BuCicurtihirsuta/3053	Aphididae	Lachninae	Lachnini	Cinara	curtihirsuta
	Buchnera aphidicola BuCicurvipes/3402	Aphididae	Lachninae	Lachnini	Cinara	curvipes
	Buchnera aphidicola BuCikochiana/2762	Aphididae	Lachninae	Lachnini	Cinara	kochiana
	Buchnera aphidicola BuCilaricifoliae/3058	Aphididae	Lachninae	Lachnini	Cinara	laricifoliae
	Buchnera aphidicola BuCipiceae/3303	Aphididae	Lachninae	Lachnini	Cinara	piceae
	Buchnera aphidicola BuCisplendens/3004	Aphididae	Lachninae	Lachnini	Cinara	splendens
	Buchnera aphidicola BuCisplendens/pseudotsugae/3390	Aphididae	Lachninae	Lachnini	Cinara	splendens/pseudotsugae 3390
	Buchnera aphidicola BuCistrobi/3249	Aphididae	Lachninae	Lachnini	Cinara	strobi
	Buchnera aphidicola Cc	Aphididae	Lachninae	Lachnini	Cinara	cedri
	Buchnera aphidicola Ct	Aphididae	Lachninae	Lachnini	Cinara	tujafilina

## Sheet: Table S6
Table S4 WolbachiaAEF, WolbachiaBCD and WolbachiaJ Host Taxonomy
	Genome Name	Supergroup	Phylum	Class	Order	Family	Genus	Species
WolbachiaAEF	Wolbachia endosymbiont of Carposina sasakii wCauA	A	Arthropoda	Insecta	Lepidoptera	Carposinidae	Carposina	sasakii
	Wolbachia endosymbiont of Drosophila incompta wInc_Cu	A	Arthropoda	Insecta	Diptera	Drosophilidae	Drosophila	incompta
	Wolbachia endosymbiont of Drosophila melanogaster	A	Arthropoda	Insecta	Diptera	Drosophilidae	Drosophila	simulans
	Wolbachia endosymbiont of Drosophila simulans wAu	A	Arthropoda	Insecta	Diptera	Drosophilidae	Drosophila	simulans
	Wolbachia endosymbiont of Drosophila simulans wHa	A	Arthropoda	Insecta	Diptera	Drosophilidae	Drosophila	simulans
	Wolbachia pipientis wAu	A	Arthropoda	Insecta	Diptera	Culicidae	Aedes	aegypti
	Wolbachia sp. wRi	A	Arthropoda	Insecta	Diptera	Drosophilidae	Drosophila	simulans
	Wolbachia endosymbiont of Ctenocephalides felis wCfeJ	E	Arthropoda	Insecta	Siphonaptera	Pulicidae	Ctenocephalides	felis
	Wolbachia endosymbiont of Ctenocephalides felis wCfeT	E	Arthropoda	Insecta	Siphonaptera	Pulicidae	Ctenocephalides	felis
	Wolbachia endosymbiont of Folsomia candida Berlin	E	Arthropoda	Collembola	Entomobryomorpha	Isotomidae	Folsomia	candida
	Wolbachia endosymbiont of Cimex lectularius wCle	F	Arthropoda	Insecta	Hemiptera	Cimicidae	Cimex	lectularius
WolbachiaBCD	Wolbachia endosymbiont of Chrysomya megacephala wMeg	B	Arthropoda	Insecta	Diptera	Calliphoridae	Chrysomya	megacephala
	Wolbachia endosymbiont of Culex quinquefasciatus Pel	B	Arthropoda	Insecta	Diptera	Culicidae	Culex	quinquefasciatus
	Wolbachia endosymbiont of Drosophila mauritiana wMau	B	Arthropoda	Insecta	Diptera	Drosophilidae	Drosophila	mauritiana
	Wolbachia endosymbiont of Drosophila simulans wNo	B	Arthropoda	Insecta	Diptera	Drosophilidae	Drosophila	simulans
	Wolbachia endosymbiont wPip_Mol of Culex molestus	B	Arthropoda	Insecta	Diptera	Culicidae	Culex	molestus
	Wolbachia pipientis wAlbB	B	Arthropoda	Insecta	Diptera	Culicidae	Aedes	albopictus
	Wolbachia endosymbiont Cameroon of Onchocerca volvulus	C	Nematoda	Chromadorea;	Rhabditida	Onchocercidae	Onchocerca	volvulus
	Wolbachia endosymbiont of Dirofilaria (Dirofilaria) immitis FR3	C	Nematoda	Chromadorea;	Rhabditida	Onchocercidae	Dirofilaria	immitis
	Wolbachia sp. wOo	C	Nematoda	Chromadorea;	Rhabditida	Onchocercidae	Onchocerca	ochengi
	Wolbachia endosymbiont of Brugia pahangi FR3	D	Nematoda	Chromadorea;	Rhabditida	Onchocercidae	Brugia	pahangi
	Wolbachia endosymbiont of Litomosoides sigmodontis wLsig	D	Nematoda	Chromadorea;	Rhabditida	Onchocercidae	Litomosoides	sigmodontis
	Wolbachia endosymbiont TRS of Brugia malayi	D	Nematoda	Chromadorea;	Rhabditida	Onchocercidae	Brugia	malayi
WolbachiaJ	Wolbachia endosymbiont of Cruorifilaria tuberocauda 55YT	J	Nematoda	Chromadorea;	Rhabditida	Onchocercidae	Cruorifilaria	tuberocauda
	Wolbachia endosymbiont of Dipetalonema caudispina 362YU	J	Nematoda	Chromadorea;	Rhabditida	Onchocercidae	Dipetalonema	caudispina
